# Supplementary material for: Report on the complete mitochondrial genome of the critically endangered and endemic Lauraceae plant Syndiclis anlungensis in China
Source: Research Square preprint supplement (doi:10.21203/rs.3.rs-6835863/v1), 2025-07-01
Supplement: Supplementary file 1 [file 5f6b8dad22994af1e55ff859.pdf]

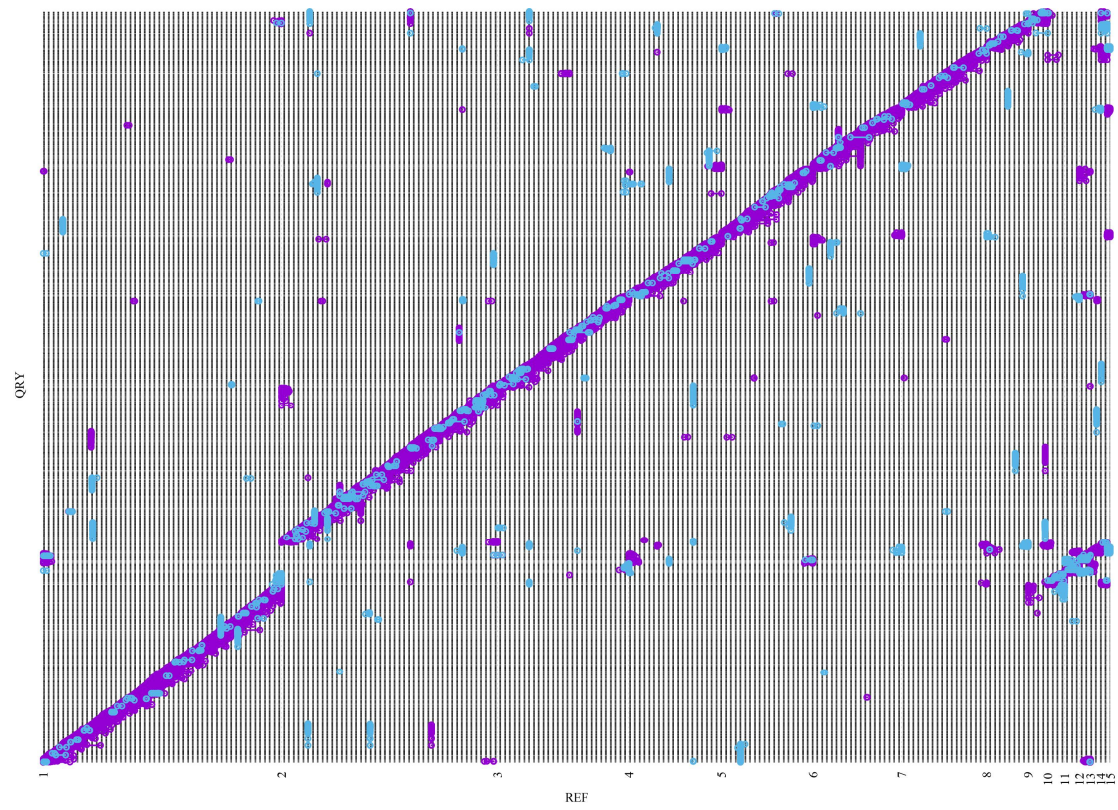

Fig. S2: The coverage validation map aligned to the assembly results of long reads (specifically filtering sequences with overlaps greater than 5k).
