# Supplementary material for: Report on the complete mitochondrial genome of the critically endangered and endemic Lauraceae plant Syndiclis anlungensis in China
Source: Research Square preprint supplement (doi:10.21203/rs.3.rs-6835863/v1), 2025-07-01
Supplement: Supplementary file 1 [file 353c7d5f4b23a773b14e9f9f.xlsx]

## Sheet: Table S5
Table S5. Nucleotide diversity mitochondrial genomes of S. anlungensis, C. henryi, C. camphora, and C. chekiangense
#No.	Region	Pi	Total Number of mutations	Region length
1	gene1.atp8	0.01146	11	486
2	gene10.atp6	0.01852	25	873
3	gene11.rps7	0.0063	5	450
4	gene12.nad9	0.00262	3	573
5	gene13.rps1	0.0143	16	606
6	gene14.rps4	0.00487	7	1053
7	gene15.ccmC	0.01519	20	875
8	gene16.nad4	0.00314	9	1488
9	gene17.nad6	0.0235	24	748
10	gene18.cox2	0.00264	4	765
11	gene19.sdh3	0.02626	14	552
12	gene2.cox3	0.00125	2	798
13	gene20.ccmFn	0.0071	23	1841
14	gene21.rpl10	0.00686	6	486
15	gene22.rpl5	0.00627	7	558
16	gene23.rps14	0.00605	3	303
17	gene24.cob	0.00522	11	1182
18	gene25.rpl2	0.0045	14	1668
19	gene26.atp1	0.00741	19	1530
20	gene27.nad1	0.00257	4	978
21	gene28.rps10	0.02709	16	369
22	gene29.ccmB	0.00805	9	621
23	gene3.sdh4	0.01543	10	378
24	gene30.rrn5	0	0	119
25	gene31.rrn18	0.00717	29	2362
26	gene32.nad2	0.00329	9	1467
27	gene33.ccmFc	0.00522	13	1347
28	gene34.atp4	0.01476	14	600
29	gene35.nad4L	0.011	6	303
30	gene36.nad7	0.00394	9	1185
31	gene37.rps11	0.00291	3	552
32	gene38.nad5	0.00317	12	2001
33	gene39.nad3	0.007	5	357
34	gene4.atp9	0.00519	2	255
35	gene40.rps12	0.00529	3	378
36	gene41.rps2	0.0051	6	621
37	gene42.rrn26	0.00808	57	3777
38	gene43.cox1	0.00389	11	1584
39	gene5.rps13	0.00332	2	351
40	gene6.rpl16	0.00711	7	540
41	gene7.rps3	0.00857	26	1692
42	gene8.rps19	0.01596	8	327
43	gene9.mttB	0.00718	5	801
