# Supplementary material for: Report on the complete mitochondrial genome of the critically endangered and endemic Lauraceae plant Syndiclis anlungensis in China
Source: Research Square preprint supplement (doi:10.21203/rs.3.rs-6835863/v1), 2025-07-01
Supplement: Supplementary file 2 [file 4f753e17480d8a4f9d0daa37.xlsx]

## Sheet: Sheet1
Table S4. List for the chloroplast-to-mitochondrial sequences transfer of Syndiclis anlungensis
No	Length (bp)	subject-mt	Cp-Gene	Cp-Sequence position（bp）	Mt-Gene	Mt-Sequence position（bp）	Identity
							(%)
1	7937	2	rps7(partical:57.69%);rps12(trans_splicing);trnV-GAC;rrn16;trnI-GAU;ycf68;trnA-UGC;rrn23(partical:31.39%)	101240-109176	trnA-TGC;trnI-GAT;trnV-GAC	195997-188069	99.836
2	3716	2	rpl16(partical:18.96%);rps3;rpl22;rps19;rpl23;trnI-CAU;ycf2(partical:17.01%)	87447-91147	trnL-CAA	168065-171755	98.009
3	1777	2	ycf2(partical:17.01%);trnI-CAU;rpl23(trans_splicing)(partical:98.64%)	156801-158567	trnL-CAA	171755-169983	98.537
4	1116	2	rpoC1(partical:8.73%);rpoB(partical:25.95%)	25395-26509		125517-124409	98.566
5	165	2		112706-112870		172028-171871	94.545
6	221	2	ndhD(partical:12.79%)	122521-122741		61023-60813	85.52
7	109	2	rpoC2(partical:2.56%)	18839-18945		178919-178811	97.248
8	79	2	trnK-UUU(partical:3.06%);matK(partical:5.18%)	5038-5116		165750-165672	94.937
9	68	2		158109-158175		173619-173552	92.647
10	97	2	rrn23(partical:3.48%)	108722-108818	rrn26(partical:2.58%)	39275-39179	82.474
11	73	2	trnM-CAU	56817-56889	trnM-CAT	201716-201788	84.932
12	32	2	ndhF(partical:1.44%)	116329-116360		199971-199940	100
13	34	2	rrn23(partical:1.22%)	109369-109402		92487-92454	97.059
14	7937	1	rps7(partical:57.69%);rps12(trans_splicing);trnV-GAC;rrn16;trnI-GAU;ycf68;trnA-UGC;rrn23(partical:31.39%)	101240-109176	trnA-TGC;trnI-GAT;trnV-GAC	1387655-1379727	99.836
15	7101	1	trnH-GUG;psbA;trnK-UUU;matK;rps16	1541-8640	trnH-GTG	344646-337561	99.62
16	5143	1	rps7(partical:43.38%);ndhB;trnL-CAA;ycf2(partical:10.63%)	146704-151844	trnL-CAA	1746591-1741450	99.786
17	4265	1	ycf3(partical:85.34%);trnS-GGA;rps4;trnT-UGU	46345-50607	trnT-TGT;trnS-GGA	1741458-1737218	98.968
18	3099	1	trnN-GUU;trnR-ACG;rrn5;rrn4.5;rrn23(partical:52.60%)	135226-138324	trnR-ACG;trnN-GTT	224407-221314	99.322
19	2551	1	psaB(partical:33.51%);psaA(partical:79.32%)	42396-44946		2135163-2132617	99.804
20	3013	1	rbcL;accD(partical:13.03%)	59110-62093		796948-793978	94.623
21	2218	1	trnL-UAA(partical:41.91%);trnF-GAA;ndhJ;ndhK(partical:41.98%)	51177-53386	trnF-GAA	1481263-1479064	98.016
22	2099	1	atpE;atpB	57001-59099		1280675-1282768	97.523
23	2050	1	psbD(partical:52.73%);psbC	36957-39004		1405983-1407997	94.39
24	1481	1	psaB(partical:66.49%)	40915-42395		759849-758369	99.797
25	1722	1	trnG-UCC(partical:5.74%);trnR-UCU;atpA(partical:87.60%)	11832-13534	trnR-TCT	786259-784545	94.135
26	1014	1	trnG-GCC;trnfM-CAU;rps14	39801-40812	trnM-CAT;trnG-GCC	1766327-1765315	99.606
27	500	1	atpI(partical:63.44%)	16662-17161		427309-427808	99.6
28	498	1	rpl16(partical:35.55%)	86934-87430		1748910-1749407	99.598
29	1414	1	trnD-GUC;trnY-GUA;trnE-UUC	32939-34312	trnE-TTC;trnY-GTA;trnD-GTC	486835-485537	78.642
30	341	1	clpP(partical:16.58%)	76380-76720		628213-627873	99.707
31	647	1	petN	30734-31368		486871-487502	83.771
32	321	1	psbA(partical:30.23%)	2160-2480		1003291-1003611	94.704
33	314	1	atpF(partical:24.32%)	14151-14462		883269-882958	94.904
34	263	1	rrn16(partical:17.64%)	142642-142904		158295-158033	99.62
35	254	1	ycf2(partical:3.71%)	153014-153267		1715041-1714788	100
36	276	1		74288-74563		838581-838855	96.739
37	399	1	trnW-CCA;trnP-UGG	71566-71956	trnW-CCA;trnP-TGG	943198-943585	86.717
38	204	1		45525-45728		959794-959591	99.02
39	237	1	rpoB(partical:7.41%)	27088-27324		655464-655228	92.405
40	889	1	rrn16(partical:57.95%)	104668-105531	rrn18(partical:38.97%)	1434686-1433828	73.903
41	557	1	rpoC2(partical:12.83%)	18980-19515		915519-916051	77.199
42	146	1	rrn16(partical:9.79%)	143304-143449		1722595-1722450	98.63
43	122	1	trnM-CAU(partical:75.34%)	56835-56956	trnM-CAT(partical:75.34%)	2086198-2086077	95.082
44	241	1		52006-52236		1134662-1134901	81.328
45	152	1	psbC(partical:5.49%)	38808-38957		1895599-1895743	85.526
46	88	1	trnI-GAU(partical:8.66%)	140841-140928		1781812-1781725	96.591
47	83	1	trnH-GUG	1573-1655	trnH-GTG	512810-512892	97.59
48	84	1	trnN-GUU	112537-112620	trnN-GTT	309927-309844	96.429
49	72	1	trnN-GUU(partical:95.83%)	112547-112617	trnN-GTT(partical:95.95%)	1757007-1756936	95.833
50	79	1	trnM-CAU	56815-56893	trnM-CAT	513460-513382	92.405
51	57	1	ndhC(partical:15.70%)	53953-54009		206962-206906	100
52	90	1	psbB(partical:5.89%)	78101-78190		246582-246498	88.889
53	66	1	trnN-GUU(partical:84.72%)	135328-135393	trnN-GTT(partical:87.50%)	1502247-1502182	95.455
54	85	1		52050-52131		397867-397783	89.412
55	58	1	petB(partical:4.02%)	80904-80961		1830147-1830204	94.828
56	61	1	trnP-UGG(partical:50.00%)	71841-71900		117862-117922	91.803
57	41	1	ycf2(partical:0.60%)	95581-95621		821538-821498	100
58	41	1	ycf2(partical:0.60%)	95581-95621		1172469-1172509	100
59	37	1	ycf2(partical:0.54%)	156597-156633		787525-787489	100
60	33	1	ndhB(partical:1.51%)	148891-148923		1520720-1520688	100
61	33	1		103572-103604		650052-650020	96.97
