# Supplementary material for: Report on the complete mitochondrial genome of the critically endangered and endemic Lauraceae plant Syndiclis anlungensis in China
Source: Research Square preprint supplement (doi:10.21203/rs.3.rs-6835863/v1), 2025-07-01
Supplement: Supplementary file 3 [file 550ac255b11fb21b43e16a5b.xlsx]

## Sheet: Table S1A
Table S1A. Statistics of simple sequence repeats
ID	SSR nr.	SSR type	SSR	size	start	end
chr1	1	p3	(CTT)5	15	1114	1128
chr1	2	p2	(TC)5	10	3769	3778
chr1	3	p2	(GA)5	10	13365	13374
chr1	4	p2	(GA)6	12	13437	13448
chr1	5	p2	(GA)5	10	16665	16674
chr1	6	p4	(GAAA)4	16	17366	17381
chr1	7	p1	(G)11	11	23098	23108
chr1	8	p2	(CA)5	10	23470	23479
chr1	9	p1	(G)11	11	25377	25387
chr1	10	p2	(TA)5	10	31163	31172
chr1	11	p4	(CAAC)3	12	31279	31290
chr1	12	p1	(A)11	11	37997	38007
chr1	13	p1	(A)11	11	40986	40996
chr1	14	p1	(A)11	11	41264	41274
chr1	15	p1	(A)10	10	42102	42111
chr1	16	p4	(TCAA)3	12	42379	42390
chr1	17	p2	(CT)6	12	48283	48294
chr1	18	p3	(AGC)4	12	55495	55506
chr1	19	p4	(GGAT)3	12	57012	57023
chr1	20	p4	(ATAC)3	12	57066	57077
chr1	21	p4	(AATG)3	12	59428	59439
chr1	22	p5	(CCTAA)3	15	60064	60078
chr1	23	p6	(CCTCAG)3	18	65788	65805
chr1	24	p3	(CTT)5	15	70148	70162
chr1	25	p1	(A)10	10	90795	90804
chr1	26	p2	(AT)8	16	93490	93505
chr1	27	p3	(GTC)4	12	100091	100102
chr1	28	p6	(AAAGGC)3	18	107774	107791
chr1	29	p1	(A)12	12	112383	112394
chr1	30	p4	(ACCA)3	12	113727	113738
chr1	31	p4	(AGCA)3	12	116619	116630
chr1	32	p5	(GGTAA)3	15	118193	118207
chr1	33	p3	(TGT)4	12	118791	118802
chr1	34	p1	(T)10	10	118956	118965
chr1	35	p3	(TCT)4	12	119157	119168
chr1	36	p1	(T)12	12	120575	120586
chr1	37	p4	(GAAT)3	12	125585	125596
chr1	38	p1	(A)10	10	126073	126082
chr1	39	p4	(TGGG)3	12	127771	127782
chr1	40	p1	(A)11	11	130533	130543
chr1	41	p4	(TTGA)3	12	131924	131935
chr1	42	p4	(GATG)3	12	143875	143886
chr1	43	p2	(TA)5	10	148333	148342
chr1	44	p4	(GAAA)3	12	152022	152033
chr1	45	p1	(T)12	12	152993	153004
chr1	46	p2	(AG)5	10	155460	155469
chr1	47	p2	(TC)5	10	159393	159402
chr1	48	p1	(T)10	10	169139	169148
chr1	49	p3	(AAG)4	12	172161	172172
chr1	50	p5	(CTTTG)3	15	173602	173616
chr1	51	p4	(ATTA)3	12	181374	181385
chr1	52	p5	(AAGAA)3	15	181423	181437
chr1	53	p3	(GAT)5	15	183220	183234
chr1	54	p1	(A)11	11	186195	186205
chr1	55	p2	(TA)7	14	188745	188758
chr1	56	p4	(ATTC)3	12	189115	189126
chr1	57	p4	(GGAT)3	12	191546	191557
chr1	58	p4	(TTAC)3	12	197182	197193
chr1	59	p4	(TCTT)3	12	202280	202291
chr1	60	p4	(TTCT)3	12	203523	203534
chr1	61	p1	(T)15	15	207169	207183
chr1	62	p4	(AAAG)3	12	209381	209392
chr1	63	p1	(A)10	10	210083	210092
chr1	64	p4	(CTTG)4	16	214719	214734
chr1	65	p3	(AGA)4	12	218526	218537
chr1	66	p2	(AG)5	10	219669	219678
chr1	67	p1	(A)18	18	236869	236886
chr1	68	p1	(A)16	16	239804	239819
chr1	69	p4	(AAAG)3	12	248311	248322
chr1	70	p4	(TTTA)5	20	250810	250829
chr1	71	p4	(CCTA)3	12	252060	252071
chr1	72	p4	(ATCT)5	20	259444	259463
chr1	73	p1	(T)10	10	266632	266641
chr1	74	p1	(A)17	17	269115	269131
chr1	75	p4	(TTCC)3	12	270768	270779
chr1	76	p4	(AATG)3	12	274469	274480
chr1	77	p2	(TC)5	10	275766	275775
chr1	78	p1	(T)11	11	275819	275829
chr1	79	p1	(T)10	10	277911	277920
chr1	80	p4	(TTTC)3	12	277918	277929
chr1	81	p3	(TGA)4	12	278596	278607
chr1	82	p3	(CTT)4	12	279310	279321
chr1	83	p4	(GGCC)3	12	280949	280960
chr1	84	p1	(A)12	12	285664	285675
chr1	85	p4	(TTTG)3	12	286610	286621
chr1	86	p5	(TCTAG)3	15	288869	288883
chr1	87	p6	(GAGATT)3	18	294073	294090
chr1	88	p4	(TTTC)3	12	296338	296349
chr1	89	p4	(CAAG)3	12	298302	298313
chr1	90	p1	(T)12	12	301813	301824
chr1	91	p4	(TGAC)3	12	305153	305164
chr1	92	p4	(GGAT)3	12	310203	310214
chr1	93	p1	(T)12	12	310921	310932
chr1	94	p1	(G)10	10	313104	313113
chr1	95	p4	(ATCA)3	12	317213	317224
chr1	96	p3	(GTT)4	12	319233	319244
chr1	97	p3	(ATA)4	12	321285	321296
chr1	98	p1	(G)11	11	323860	323870
chr1	99	p4	(AGAC)3	12	330736	330747
chr1	100	p4	(GGGC)3	12	331717	331728
chr1	101	p4	(ATAG)3	12	332289	332300
chr1	102	p4	(CCTT)3	12	333104	333115
chr1	103	p1	(T)17	17	334395	334411
chr1	104	p1	(A)20	20	337556	337575
chr1	105	p1	(A)10	10	338634	338643
chr1	106	p1	(T)10	10	339001	339010
chr1	107	p1	(A)10	10	339025	339034
chr1	108	p1	(A)10	10	339400	339409
chr1	109	p1	(A)10	10	339547	339556
chr1	110	p1	(A)10	10	339964	339973
chr1	111	p1	(T)11	11	340643	340653
chr1	112	p1	(A)13	13	342841	342853
chr1	113	p1	(T)11	11	342880	342890
chr1	114	p4	(TATC)3	12	342937	342948
chr1	115	p1	(A)15	15	344637	344651
chr1	116	p2	(AG)5	10	344666	344675
chr1	117	p4	(GACT)3	12	348393	348404
chr1	118	p2	(AT)6	12	348993	349004
chr1	119	p4	(AAGA)3	12	349372	349383
chr1	120	p4	(CAAT)3	12	354012	354023
chr1	121	p4	(AGAA)3	12	355069	355080
chr1	122	p2	(AG)6	12	355658	355669
chr1	123	p2	(GA)6	12	355742	355753
chr1	124	p2	(CT)5	10	358139	358148
chr1	125	p2	(TA)6	12	359075	359086
chr1	126	p4	(AATA)3	12	363244	363255
chr1	127	p4	(ACTG)3	12	366045	366056
chr1	128	p4	(CTTT)3	12	367260	367271
chr1	129	p2	(GA)8	16	368931	368946
chr1	130	p4	(ACCA)3	12	369555	369566
chr1	131	p2	(CT)6	12	378760	378771
chr1	132	p3	(AAG)4	12	381806	381817
chr1	133	p1	(T)12	12	385411	385422
chr1	134	p2	(AC)5	10	390204	390213
chr1	135	p4	(GGAA)3	12	391195	391206
chr1	136	p4	(GATT)3	12	392685	392696
chr1	137	p3	(AAG)4	12	394146	394157
chr1	138	p4	(GAAA)3	12	397741	397752
chr1	139	p5	(CTAGA)3	15	397833	397847
chr1	140	p4	(TTGA)3	12	414088	414099
chr1	141	p1	(A)10	10	427309	427318
chr1	142	p1	(A)10	10	436411	436420
chr1	143	p1	(T)10	10	439445	439454
chr1	144	p1	(A)11	11	443705	443715
chr1	145	p4	(AGCC)3	12	445023	445034
chr1	146	p4	(ACTA)3	12	446541	446552
chr1	147	p1	(T)10	10	448321	448330
chr1	148	p2	(TA)5	10	449303	449312
chr1	149	p1	(A)15	15	457556	457570
chr1	150	p2	(TC)5	10	457790	457799
chr1	151	p5	(TCGAG)3	15	462405	462419
chr1	152	p1	(T)11	11	472353	472363
chr1	153	p2	(TC)5	10	475816	475825
chr1	154	p2	(AG)6	12	475841	475852
chr1	155	p3	(GCA)4	12	477049	477060
chr1	156	p3	(TGT)4	12	477515	477526
chr1	157	p1	(G)10	10	480903	480912
chr1	158	p1	(A)10	10	485533	485542
chr1	159	p1	(A)15	15	485961	485975
chr1	160	p4	(GAAA)3	12	485993	486004
chr1	161	p4	(ATCT)3	12	486717	486728
chr1	162	p1	(A)17	17	486840	486856
chr1	163	p1	(A)11	11	487462	487472
chr1	164	p2	(AG)5	10	487950	487959
chr1	165	p4	(TCAG)3	12	496005	496016
chr1	166	p4	(TTCC)3	12	496028	496039
chr1	167	p4	(AAGT)3	12	499436	499447
chr1	168	p4	(CTTT)3	12	499791	499802
chr1	169	p4	(TAGC)3	12	499857	499868
chr1	170	p4	(GAAT)3	12	513955	513966
chr1	171	p2	(GA)5	10	522507	522516
chr1	172	p4	(TCGT)3	12	522822	522833
chr1	173	p5	(GGCAA)3	15	523817	523831
chr1	174	p4	(ATAG)3	12	524388	524399
chr1	175	p2	(AG)5	10	525520	525529
chr1	176	p2	(CT)6	12	529830	529841
chr1	177	p5	(TATAC)3	15	530252	530266
chr1	178	p4	(TGAA)3	12	533271	533282
chr1	179	p1	(T)12	12	534551	534562
chr1	180	p4	(AAGA)3	12	534753	534764
chr1	181	p4	(TCTT)3	12	536431	536442
chr1	182	p4	(AAGG)3	12	538739	538750
chr1	183	p1	(A)11	11	541951	541961
chr1	184	p4	(GAGC)3	12	542576	542587
chr1	185	p4	(GCTA)3	12	543153	543164
chr1	186	p4	(GGCC)3	12	545468	545479
chr1	187	p1	(A)10	10	546339	546348
chr1	188	p4	(ACTG)3	12	548765	548776
chr1	189	p4	(TGAC)3	12	548870	548881
chr1	190	p2	(TA)5	10	552790	552799
chr1	191	p2	(AT)13	26	552801	552826
chr1	192	p3	(TCT)4	12	560856	560867
chr1	193	p1	(T)10	10	565556	565565
chr1	194	p1	(T)10	10	566149	566158
chr1	195	p4	(AATC)3	12	568761	568772
chr1	196	p4	(AAGA)3	12	577323	577334
chr1	197	p4	(GATA)3	12	577517	577528
chr1	198	p5	(GAAAT)3	15	579088	579102
chr1	199	p4	(AAGG)3	12	583703	583714
chr1	200	p4	(AATC)3	12	588667	588678
chr1	201	p4	(ATCG)3	12	596731	596742
chr1	202	p2	(AG)5	10	605923	605932
chr1	203	p1	(T)10	10	608264	608273
chr1	204	p4	(GGAA)3	12	615361	615372
chr1	205	p4	(CTTT)3	12	619928	619939
chr1	206	p4	(GAAA)3	12	620985	620996
chr1	207	p1	(T)11	11	628203	628213
chr1	208	p4	(TCTT)3	12	629182	629193
chr1	209	p4	(TTTC)3	12	629369	629380
chr1	210	p2	(AT)7	14	630059	630072
chr1	211	p4	(CAAG)3	12	631434	631445
chr1	212	p3	(ATA)4	12	634946	634957
chr1	213	p2	(CT)5	10	637587	637596
chr1	214	p6	(AAATAG)3	18	639780	639797
chr1	215	p4	(TCTT)4	16	641159	641174
chr1	216	p2	(CT)6	12	644593	644604
chr1	217	p3	(TTC)5	15	649009	649023
chr1	218	p1	(A)10	10	652719	652728
chr1	219	p4	(GCTT)3	12	652867	652878
chr1	220	p1	(A)13	13	657774	657786
chr1	221	p4	(TAAG)3	12	662073	662084
chr1	222	p4	(TATC)3	12	664734	664745
chr1	223	p2	(AG)5	10	669853	669862
chr1	224	p4	(ATAA)3	12	670104	670115
chr1	225	p1	(A)12	12	670178	670189
chr1	226	p4	(CAAG)3	12	678044	678055
chr1	227	p3	(TAA)4	12	685734	685745
chr1	228	p2	(CT)5	10	688865	688874
chr1	229	p1	(G)10	10	689471	689480
chr1	230	p2	(TC)6	12	693307	693318
chr1	231	p4	(ATCT)3	12	693470	693481
chr1	232	p2	(TC)6	12	696362	696373
chr1	233	p4	(AGCA)3	12	698928	698939
chr1	234	p1	(A)13	13	702755	702767
chr1	235	p6	(GATGGG)3	18	707820	707837
chr1	236	p5	(CTAAC)3	15	710770	710784
chr1	237	p2	(GA)6	12	711638	711649
chr1	238	p3	(GAA)4	12	715809	715820
chr1	239	p5	(AAGAA)3	15	717644	717658
chr1	240	p1	(T)12	12	719501	719512
chr1	241	p1	(A)10	10	721650	721659
chr1	242	p4	(GGAG)3	12	721982	721993
chr1	243	p4	(GGGA)3	12	723432	723443
chr1	244	p4	(GATA)3	12	725543	725554
chr1	245	p2	(AG)7	14	736153	736166
chr1	246	p2	(TC)5	10	747128	747137
chr1	247	p3	(TCT)4	12	749947	749958
chr1	248	p4	(CTTT)3	12	753314	753325
chr1	249	p1	(T)12	12	759838	759849
chr1	250	p1	(C)10	10	759902	759911
chr1	251	p4	(CTTG)3	12	763364	763375
chr1	252	p3	(ACT)4	12	763777	763788
chr1	253	p1	(T)13	13	764223	764235
chr1	254	p4	(ATTC)3	12	779207	779218
chr1	255	p4	(AATC)3	12	779876	779887
chr1	256	p1	(A)10	10	782429	782438
chr1	257	p2	(TA)5	10	789623	789632
chr1	258	p2	(TC)5	10	795807	795816
chr1	259	p1	(T)18	18	796943	796960
chr1	260	p4	(GAAA)4	16	800294	800309
chr1	261	p4	(CTAT)3	12	800827	800838
chr1	262	p4	(CAGA)3	12	803313	803324
chr1	263	p4	(GAAA)3	12	808890	808901
chr1	264	p1	(A)10	10	822721	822730
chr1	265	p1	(T)13	13	824096	824108
chr1	266	p2	(AG)5	10	826988	826997
chr1	267	p3	(TCA)4	12	828118	828129
chr1	268	p3	(TTG)4	12	830068	830079
chr1	269	p2	(TA)6	12	835357	835368
chr1	270	p4	(AGCT)3	12	836336	836347
chr1	271	p4	(TCAT)3	12	839444	839455
chr1	272	p3	(CTT)4	12	849225	849236
chr1	273	p4	(TTCT)3	12	856472	856483
chr1	274	p2	(AG)5	10	856941	856950
chr1	275	p4	(CTTA)3	12	856965	856976
chr1	276	p4	(CTTT)3	12	857282	857293
chr1	277	p4	(CCAT)3	12	858316	858327
chr1	278	p4	(CTGA)3	12	859255	859266
chr1	279	p3	(CTT)4	12	861560	861571
chr1	280	p3	(TTC)4	12	864266	864277
chr1	281	p2	(TC)5	10	865121	865130
chr1	282	p1	(T)11	11	866334	866344
chr1	283	p1	(A)11	11	866768	866778
chr1	284	p4	(TCGA)3	12	875386	875397
chr1	285	p3	(ATC)4	12	875607	875618
chr1	286	p5	(ATTCC)3	15	875744	875758
chr1	287	p4	(GATT)3	12	876546	876557
chr1	288	p4	(TATC)3	12	876740	876751
chr1	289	p4	(ATCT)3	12	876789	876800
chr1	290	p2	(CT)5	10	884007	884016
chr1	291	p4	(GATT)3	12	885930	885941
chr1	292	p5	(ATAGA)3	15	890561	890575
chr1	293	p3	(CTT)4	12	890646	890657
chr1	294	p6	(TATACC)4	24	894017	894040
chr1	295	p4	(TTTC)3	12	903445	903456
chr1	296	p5	(TGGAA)3	15	905836	905850
chr1	297	p2	(AG)5	10	910019	910028
chr1	298	p4	(GTTG)3	12	911167	911178
chr1	299	p2	(TA)5	10	914918	914927
chr1	300	p4	(GGCT)3	12	920436	920447
chr1	301	p4	(GTAA)3	12	923167	923178
chr1	302	p3	(CTT)4	12	929040	929051
chr1	303	p2	(AT)5	10	941529	941538
chr1	304	p2	(TA)5	10	943627	943636
chr1	305	p4	(CAGC)3	12	945619	945630
chr1	306	p3	(ATT)4	12	949838	949849
chr1	307	p4	(CTAT)5	20	953350	953369
chr1	308	p4	(CATC)3	12	954252	954263
chr1	309	p3	(GTT)4	12	957950	957961
chr1	310	p4	(CTCC)3	12	968525	968536
chr1	311	p5	(TGGCT)3	15	974917	974931
chr1	312	p4	(ATCT)4	16	976245	976260
chr1	313	p1	(G)11	11	977933	977943
chr1	314	p4	(GCCC)3	12	979941	979952
chr1	315	p4	(ATAA)3	12	980381	980392
chr1	316	p4	(AAAG)3	12	984582	984593
chr1	317	p1	(T)12	12	985833	985844
chr1	318	p1	(G)11	11	987869	987879
chr1	319	p1	(A)11	11	989006	989016
chr1	320	p3	(ACT)4	12	989932	989943
chr1	321	p4	(TTCC)3	12	990540	990551
chr1	322	p4	(AGTC)3	12	991216	991227
chr1	323	p1	(T)10	10	993107	993116
chr1	324	p4	(AAGC)3	12	998639	998650
chr1	325	p3	(GCT)4	12	1000271	1000282
chr1	326	p3	(AAG)4	12	1003191	1003202
chr1	327	p4	(GATT)3	12	1007462	1007473
chr1	328	p3	(CTT)4	12	1008190	1008201
chr1	329	p4	(AAGA)3	12	1009250	1009261
chr1	330	p5	(AAGAG)3	15	1009890	1009904
chr1	331	p1	(T)12	12	1011618	1011629
chr1	332	p3	(AAG)4	12	1017117	1017128
chr1	333	p3	(AAG)4	12	1017651	1017662
chr1	334	p4	(AGAT)3	12	1019025	1019036
chr1	335	p2	(TC)5	10	1019169	1019178
chr1	336	p1	(A)10	10	1019443	1019452
chr1	337	p5	(CTCTA)3	15	1021595	1021609
chr1	338	p5	(TTAGT)3	15	1029809	1029823
chr1	339	p1	(A)12	12	1031307	1031318
chr1	340	p4	(ACCG)3	12	1037968	1037979
chr1	341	p4	(AAGA)3	12	1044979	1044990
chr1	342	p1	(T)12	12	1045190	1045201
chr1	343	p1	(C)11	11	1047390	1047400
chr1	344	p1	(T)10	10	1047458	1047467
chr1	345	p2	(GA)5	10	1050932	1050941
chr1	346	p3	(TCC)4	12	1050987	1050998
chr1	347	p2	(CT)5	10	1054550	1054559
chr1	348	p4	(GCTT)3	12	1056459	1056470
chr1	349	p2	(AT)5	10	1057685	1057694
chr1	350	p4	(CTTT)3	12	1059788	1059799
chr1	351	p4	(GGAA)3	12	1064805	1064816
chr1	352	p4	(GATT)3	12	1065109	1065120
chr1	353	p3	(CAA)4	12	1065226	1065237
chr1	354	p4	(AGAA)3	12	1068464	1068475
chr1	355	p4	(AAGC)3	12	1071753	1071764
chr1	356	p5	(GCAAA)3	15	1078599	1078613
chr1	357	p1	(A)10	10	1079850	1079859
chr1	358	p1	(C)10	10	1080930	1080939
chr1	359	p4	(GCTT)3	12	1091215	1091226
chr1	360	p3	(TTA)4	12	1094690	1094701
chr1	361	p4	(CCCG)3	12	1100470	1100481
chr1	362	p1	(T)12	12	1104288	1104299
chr1	363	p2	(AC)5	10	1109421	1109430
chr1	364	p2	(CT)6	12	1115346	1115357
chr1	365	p4	(CCCA)3	12	1116783	1116794
chr1	366	p2	(AG)5	10	1118992	1119001
chr1	367	p2	(AG)5	10	1121283	1121292
chr1	368	p2	(CA)5	10	1132582	1132591
chr1	369	p3	(GCT)4	12	1136368	1136379
chr1	370	p1	(T)14	14	1138061	1138074
chr1	371	p2	(CT)5	10	1152027	1152036
chr1	372	p2	(AG)5	10	1152995	1153004
chr1	373	p2	(AT)6	12	1154240	1154251
chr1	374	p2	(CT)5	10	1156063	1156072
chr1	375	p3	(AGC)4	12	1157709	1157720
chr1	376	p1	(T)12	12	1164404	1164415
chr1	377	p3	(TTA)4	12	1164680	1164691
chr1	378	p5	(TTGGG)3	15	1171511	1171525
chr1	379	p2	(CT)5	10	1175018	1175027
chr1	380	p2	(GA)5	10	1182059	1182068
chr1	381	p2	(TA)5	10	1190811	1190820
chr1	382	p4	(GTAA)3	12	1198060	1198071
chr1	383	p4	(ATAG)3	12	1199833	1199844
chr1	384	p1	(A)14	14	1200093	1200106
chr1	385	p4	(CCTT)3	12	1200181	1200192
chr1	386	p4	(AAAG)3	12	1200217	1200228
chr1	387	p3	(TTC)4	12	1203028	1203039
chr1	388	p4	(ATAG)3	12	1207814	1207825
chr1	389	p3	(CTT)5	15	1212056	1212070
chr1	390	p2	(AG)5	10	1214596	1214605
chr1	391	p4	(TCCC)3	12	1223204	1223215
chr1	392	p4	(TGAA)3	12	1224738	1224749
chr1	393	p4	(GGAT)3	12	1231841	1231852
chr1	394	p4	(AAAG)4	16	1234993	1235008
chr1	395	p2	(GA)6	12	1237408	1237419
chr1	396	p4	(CTTT)3	12	1241261	1241272
chr1	397	p2	(AT)5	10	1246485	1246494
chr1	398	p4	(AGGA)3	12	1251399	1251410
chr1	399	p4	(AAAG)4	16	1251665	1251680
chr1	400	p2	(CT)5	10	1253435	1253444
chr1	401	p2	(AG)5	10	1268194	1268203
chr1	402	p6	(TTATAA)3	18	1271325	1271342
chr1	403	p3	(TCT)4	12	1272713	1272724
chr1	404	p3	(AAG)5	15	1273396	1273410
chr1	405	p1	(T)14	14	1280684	1280697
chr1	406	p1	(A)13	13	1282775	1282787
chr1	407	p4	(TGAA)3	12	1284670	1284681
chr1	408	p2	(CT)5	10	1302386	1302395
chr1	409	p3	(CTG)4	12	1305601	1305612
chr1	410	p4	(CACG)3	12	1307744	1307755
chr1	411	p1	(T)10	10	1308451	1308460
chr1	412	p1	(T)14	14	1312613	1312626
chr1	413	p4	(TCAA)3	12	1313836	1313847
chr1	414	p4	(ATCT)3	12	1316544	1316555
chr1	415	p4	(TCCT)3	12	1316638	1316649
chr1	416	p3	(TAT)4	12	1317554	1317565
chr1	417	p2	(TC)5	10	1317896	1317905
chr1	418	p4	(TCTT)3	12	1319875	1319886
chr1	419	p4	(GGAT)3	12	1324171	1324182
chr1	420	p1	(T)13	13	1325145	1325157
chr1	421	p1	(T)11	11	1328480	1328490
chr1	422	p3	(AGA)4	12	1338430	1338441
chr1	423	p4	(TCTG)3	12	1348509	1348520
chr1	424	p1	(T)10	10	1349465	1349474
chr1	425	p4	(GAAA)3	12	1353415	1353426
chr1	426	p1	(T)11	11	1354329	1354339
chr1	427	p4	(CTTT)3	12	1354743	1354754
chr1	428	p3	(TGA)4	12	1356595	1356606
chr1	429	p4	(TAAG)3	12	1359135	1359146
chr1	430	p4	(AAAG)3	12	1360621	1360632
chr1	431	p4	(AAGA)3	12	1361129	1361140
chr1	432	p2	(CT)5	10	1362888	1362897
chr1	433	p2	(TA)9	18	1363382	1363399
chr1	434	p3	(AAG)4	12	1366116	1366127
chr1	435	p5	(TAGAG)3	15	1367074	1367088
chr1	436	p3	(AGG)5	15	1367800	1367814
chr1	437	p4	(GTCA)3	12	1392600	1392611
chr1	438	p4	(AGCA)3	12	1397233	1397244
chr1	439	p1	(T)12	12	1407985	1407996
chr1	440	p4	(AAGC)3	12	1411188	1411199
chr1	441	p3	(GTT)4	12	1415128	1415139
chr1	442	p1	(A)11	11	1425118	1425128
chr1	443	p4	(AAGG)3	12	1428178	1428189
chr1	444	p4	(GTTT)4	16	1430660	1430675
chr1	445	p4	(TTTG)3	12	1435224	1435235
chr1	446	p4	(ATTG)3	12	1442734	1442745
chr1	447	p4	(GATA)4	16	1443170	1443185
chr1	448	p4	(ATCT)3	12	1448625	1448636
chr1	449	p5	(GGTTG)3	15	1448942	1448956
chr1	450	p1	(A)10	10	1454969	1454978
chr1	451	p4	(GATA)3	12	1464156	1464167
chr1	452	p4	(ATGA)3	12	1466631	1466642
chr1	453	p6	(TATCTA)4	24	1471909	1471932
chr1	454	p1	(C)11	11	1472731	1472741
chr1	455	p5	(GGATA)3	15	1474887	1474901
chr1	456	p1	(A)12	12	1481252	1481263
chr1	457	p4	(CTTA)4	16	1487122	1487137
chr1	458	p4	(GACT)3	12	1487819	1487830
chr1	459	p5	(CAGAG)3	15	1488563	1488577
chr1	460	p4	(ACCG)3	12	1493482	1493493
chr1	461	p1	(T)10	10	1493729	1493738
chr1	462	p5	(CCCCT)3	15	1494438	1494452
chr1	463	p2	(TC)6	12	1495610	1495621
chr1	464	p4	(AGAA)4	16	1496191	1496206
chr1	465	p4	(ATGA)3	12	1496381	1496392
chr1	466	p3	(TAC)4	12	1501685	1501696
chr1	467	p4	(CAGA)3	12	1504707	1504718
chr1	468	p2	(TC)5	10	1512652	1512661
chr1	469	p3	(AGG)4	12	1527063	1527074
chr1	470	p4	(TAAG)3	12	1528694	1528705
chr1	471	p1	(T)10	10	1530693	1530702
chr1	472	p2	(TA)5	10	1530798	1530807
chr1	473	p2	(TA)6	12	1539031	1539042
chr1	474	p4	(GAAA)3	12	1544957	1544968
chr1	475	p4	(AGAA)4	16	1548719	1548734
chr1	476	p2	(CT)5	10	1550581	1550590
chr1	477	p1	(A)12	12	1557414	1557425
chr1	478	p1	(T)10	10	1557429	1557438
chr1	479	p2	(TC)6	12	1557506	1557517
chr1	480	p2	(TA)5	10	1563095	1563104
chr1	481	p2	(AT)6	12	1572103	1572114
chr1	482	p4	(CCTA)3	12	1575390	1575401
chr1	483	p4	(TGCT)3	12	1578117	1578128
chr1	484	p2	(TC)5	10	1579451	1579460
chr1	485	p2	(TG)5	10	1580959	1580968
chr1	486	p5	(TTAGA)3	15	1589017	1589031
chr1	487	p2	(AG)6	12	1589913	1589924
chr1	488	p4	(GGCC)3	12	1590581	1590592
chr1	489	p3	(TAA)4	12	1594462	1594473
chr1	490	p3	(ATG)4	12	1597958	1597969
chr1	491	p2	(GA)6	12	1603705	1603716
chr1	492	p4	(TGCA)3	12	1609822	1609833
chr1	493	p3	(AAT)4	12	1612410	1612421
chr1	494	p4	(ATAG)3	12	1612586	1612597
chr1	495	p2	(TC)5	10	1613589	1613598
chr1	496	p4	(CAAT)4	16	1615084	1615099
chr1	497	p2	(AT)5	10	1622717	1622726
chr1	498	p1	(T)11	11	1628233	1628243
chr1	499	p4	(CAGT)3	12	1629217	1629228
chr1	500	p1	(A)10	10	1631076	1631085
chr1	501	p4	(TTAA)3	12	1631850	1631861
chr1	502	p4	(GATA)4	16	1633096	1633111
chr1	503	p1	(T)10	10	1633339	1633348
chr1	504	p1	(A)11	11	1640515	1640525
chr1	505	p4	(TTCA)3	12	1652499	1652510
chr1	506	p4	(TGAA)4	16	1652822	1652837
chr1	507	p4	(TACT)5	20	1655868	1655887
chr1	508	p3	(CAA)5	15	1656779	1656793
chr1	509	p2	(TC)5	10	1658040	1658049
chr1	510	p4	(AGAA)3	12	1676114	1676125
chr1	511	p2	(TC)5	10	1682664	1682673
chr1	512	p2	(CT)5	10	1684352	1684361
chr1	513	p2	(TC)5	10	1691041	1691050
chr1	514	p1	(T)18	18	1692177	1692194
chr1	515	p4	(GAAA)4	16	1695528	1695543
chr1	516	p4	(CTAT)3	12	1696061	1696072
chr1	517	p4	(CAGA)3	12	1698547	1698558
chr1	518	p4	(GAAA)3	12	1704124	1704135
chr1	519	p2	(GA)6	12	1715750	1715761
chr1	520	p5	(TGGAG)3	15	1732624	1732638
chr1	521	p1	(T)12	12	1737275	1737286
chr1	522	p1	(C)10	10	1737295	1737304
chr1	523	p4	(AGTT)3	12	1737570	1737581
chr1	524	p1	(T)14	14	1739664	1739677
chr1	525	p1	(A)12	12	1741446	1741457
chr1	526	p4	(TGGG)3	12	1747131	1747142
chr1	527	p5	(TGTCT)3	15	1748312	1748326
chr1	528	p1	(G)10	10	1751216	1751225
chr1	529	p4	(GAAA)4	16	1751748	1751763
chr1	530	p2	(AT)6	12	1766173	1766184
chr1	531	p1	(T)10	10	1766260	1766269
chr1	532	p1	(T)14	14	1766307	1766320
chr1	533	p2	(AT)6	12	1767083	1767094
chr1	534	p4	(CAAA)3	12	1776487	1776498
chr1	535	p4	(TCTT)3	12	1788627	1788638
chr1	536	p3	(AGA)4	12	1794034	1794045
chr1	537	p4	(AGGA)3	12	1794362	1794373
chr1	538	p4	(TTCT)3	12	1794799	1794810
chr1	539	p4	(AGAA)3	12	1794893	1794904
chr1	540	p4	(AAAG)3	12	1805510	1805521
chr1	541	p4	(AAGA)3	12	1815975	1815986
chr1	542	p2	(TC)5	10	1817365	1817374
chr1	543	p4	(CATT)3	12	1819606	1819617
chr1	544	p4	(AATG)3	12	1821021	1821032
chr1	545	p2	(AT)6	12	1821896	1821907
chr1	546	p4	(AGAT)3	12	1825848	1825859
chr1	547	p4	(TCCT)3	12	1826708	1826719
chr1	548	p4	(AATG)3	12	1828039	1828050
chr1	549	p4	(TAGA)3	12	1831433	1831444
chr1	550	p1	(A)13	13	1831966	1831978
chr1	551	p4	(GACT)3	12	1834359	1834370
chr1	552	p5	(CTCGA)3	15	1849911	1849925
chr1	553	p1	(T)10	10	1850990	1850999
chr1	554	p2	(AG)5	10	1851643	1851652
chr1	555	p5	(AGCCC)3	15	1857125	1857139
chr1	556	p2	(AT)5	10	1857463	1857472
chr1	557	p3	(GAA)4	12	1858264	1858275
chr1	558	p4	(AAGG)3	12	1864156	1864167
chr1	559	p3	(TTG)4	12	1867664	1867675
chr1	560	p2	(AG)5	10	1872152	1872161
chr1	561	p4	(CTTT)3	12	1881162	1881173
chr1	562	p4	(CTTG)3	12	1882001	1882012
chr1	563	p2	(AT)5	10	1882465	1882474
chr1	564	p2	(AG)5	10	1882550	1882559
chr1	565	p4	(GAAA)3	12	1886519	1886530
chr1	566	p4	(TCTT)3	12	1886589	1886600
chr1	567	p2	(AG)5	10	1894840	1894849
chr1	568	p2	(TA)6	12	1895777	1895788
chr1	569	p2	(CT)5	10	1896838	1896847
chr1	570	p4	(TTCA)3	12	1901592	1901603
chr1	571	p4	(TTTC)3	12	1902204	1902215
chr1	572	p4	(TCAA)3	12	1903764	1903775
chr1	573	p3	(AAG)4	12	1909279	1909290
chr1	574	p4	(GAAC)3	12	1912582	1912593
chr1	575	p3	(ATA)4	12	1914197	1914208
chr1	576	p4	(CTCA)4	16	1918843	1918858
chr1	577	p2	(TC)7	14	1920793	1920806
chr1	578	p4	(CTAG)3	12	1924288	1924299
chr1	579	p1	(T)16	16	1930593	1930608
chr1	580	p4	(AGAA)3	12	1949483	1949494
chr1	581	p4	(GCTT)3	12	1949665	1949676
chr1	582	p4	(GACT)3	12	1952392	1952403
chr1	583	p1	(T)10	10	1953008	1953017
chr1	584	p4	(ATCT)3	12	1958525	1958536
chr1	585	p2	(AG)5	10	1960930	1960939
chr1	586	p1	(A)11	11	1967272	1967282
chr1	587	p4	(CATC)3	12	1982581	1982592
chr1	588	p1	(A)11	11	1985288	1985298
chr1	589	p2	(AT)12	24	1988644	1988667
chr1	590	p4	(TTTG)3	12	1989120	1989131
chr1	591	p4	(TTGT)3	12	1989453	1989464
chr1	592	p4	(CAAG)3	12	1989485	1989496
chr1	593	p3	(ATT)4	12	1994122	1994133
chr1	594	p3	(AAT)4	12	1995894	1995905
chr1	595	p4	(TAGA)3	12	1997194	1997205
chr1	596	p3	(TGT)4	12	2010548	2010559
chr1	597	p4	(CTTA)3	12	2015116	2015127
chr1	598	p1	(T)11	11	2016017	2016027
chr1	599	p2	(CT)6	12	2022407	2022418
chr1	600	p2	(CA)5	10	2025455	2025464
chr1	601	p1	(T)10	10	2025987	2025996
chr1	602	p1	(T)10	10	2026388	2026397
chr1	603	p1	(A)10	10	2026516	2026525
chr1	604	p4	(ATCT)3	12	2037308	2037319
chr1	605	p3	(AAG)4	12	2043798	2043809
chr1	606	p4	(AGGA)3	12	2046978	2046989
chr1	607	p5	(ATTAT)3	15	2047211	2047225
chr1	608	p4	(CTTG)3	12	2052917	2052928
chr1	609	p4	(TTAC)3	12	2054222	2054233
chr1	610	p4	(ATTC)3	12	2063061	2063072
chr1	611	p3	(TCT)4	12	2064254	2064265
chr1	612	p3	(AAG)4	12	2066634	2066645
chr1	613	p1	(T)10	10	2069836	2069845
chr1	614	p4	(CTTT)3	12	2069972	2069983
chr1	615	p1	(A)12	12	2071561	2071572
chr1	616	p1	(C)12	12	2081812	2081823
chr1	617	p1	(T)11	11	2082242	2082252
chr1	618	p1	(A)12	12	2086072	2086083
chr1	619	p1	(A)11	11	2087841	2087851
chr1	620	p6	(ATAGAA)3	18	2089084	2089101
chr1	621	p3	(GAA)4	12	2089954	2089965
chr1	622	p1	(A)11	11	2091295	2091305
chr1	623	p1	(C)11	11	2105905	2105915
chr1	624	p1	(A)12	12	2105916	2105927
chr1	625	p4	(CTTA)4	16	2111786	2111801
chr1	626	p3	(TAT)4	12	2114524	2114535
chr1	627	p1	(G)10	10	2115069	2115078
chr1	628	p3	(TTA)5	15	2115208	2115222
chr1	629	p3	(GTT)4	12	2117788	2117799
chr2	1	p2	(TA)7	14	958	971
chr2	2	p3	(TCT)4	12	7886	7897
chr2	3	p4	(AATA)4	16	9803	9818
chr2	4	p2	(CT)5	10	11476	11485
chr2	5	p2	(AG)5	10	12507	12516
chr2	6	p2	(TA)8	16	20651	20666
chr2	7	p4	(CGAA)3	12	20706	20717
chr2	8	p4	(ATCG)3	12	21142	21153
chr2	9	p2	(TC)5	10	28360	28369
chr2	10	p4	(CAAG)3	12	28894	28905
chr2	11	p1	(C)10	10	36903	36912
chr2	12	p4	(TTTG)3	12	40221	40232
chr2	13	p2	(CT)5	10	41237	41246
chr2	14	p4	(GATA)3	12	44549	44560
chr2	15	p4	(CCAA)3	12	46358	46369
chr2	16	p2	(GA)5	10	52057	52066
chr2	17	p2	(AC)6	12	53455	53466
chr2	18	p5	(TCTTA)3	15	54662	54676
chr2	19	p4	(CTTG)3	12	55796	55807
chr2	20	p3	(TCC)4	12	56221	56232
chr2	21	p4	(TGCT)3	12	56799	56810
chr2	22	p1	(T)11	11	57849	57859
chr2	23	p3	(ACT)4	12	59953	59964
chr2	24	p4	(CTTC)3	12	61224	61235
chr2	25	p1	(T)12	12	65660	65671
chr2	26	p1	(T)14	14	71783	71796
chr2	27	p3	(CTA)4	12	74857	74868
chr2	28	p5	(CTAGA)3	15	84796	84810
chr2	29	p4	(CTGA)3	12	87191	87202
chr2	30	p3	(TTA)4	12	94155	94166
chr2	31	p2	(AG)5	10	106273	106282
chr2	32	p2	(AT)5	10	109791	109800
chr2	33	p4	(GCAT)3	12	114111	114122
chr2	34	p1	(T)10	10	117148	117157
chr2	35	p1	(T)10	10	117226	117235
chr2	36	p4	(TGAT)3	12	121066	121077
chr2	37	p3	(AAT)4	12	123335	123346
chr2	38	p4	(AAAG)3	12	127583	127594
chr2	39	p4	(CTTC)3	12	128370	128381
chr2	40	p4	(GGCT)3	12	128418	128429
chr2	41	p2	(AG)5	10	134022	134031
chr2	42	p4	(TTCT)3	12	135567	135578
chr2	43	p5	(TGGAT)3	15	144443	144457
chr2	44	p1	(A)12	12	146123	146134
chr2	45	p2	(TC)5	10	150971	150980
chr2	46	p2	(TA)14	28	157073	157100
chr2	47	p3	(TCC)4	12	159404	159415
chr2	48	p1	(A)13	13	161303	161315
chr2	49	p1	(T)15	15	168268	168282
chr2	50	p1	(T)11	11	168397	168407
chr2	51	p1	(T)10	10	168932	168941
chr2	52	p2	(TC)5	10	169152	169161
chr2	53	p1	(T)11	11	169206	169216
chr2	54	p6	(GTAGTC)3	18	173458	173475
chr2	55	p1	(A)12	12	177278	177289
chr2	56	p3	(CTC)4	12	177471	177482
chr2	57	p4	(CTTT)3	12	177645	177656
chr2	58	p1	(T)11	11	180022	180032
chr2	59	p1	(T)10	10	180534	180543
chr2	60	p2	(CT)5	10	180702	180711
chr2	61	p1	(T)10	10	182056	182065
chr2	62	p4	(AGAA)3	12	183222	183233
chr2	63	p5	(CTAGT)3	15	185237	185251
chr2	64	p4	(TTTC)3	12	208602	208613
chr2	65	p1	(T)11	11	209948	209958
chr2	66	p2	(CT)5	10	214180	214189
chr2	67	p3	(ATA)4	12	214939	214950
chr2	68	p2	(AT)6	12	214948	214959
chr2	69	p1	(G)10	10	224604	224613
chr2	70	p1	(C)11	11	224732	224742
chr2	71	p4	(AGAT)4	16	224980	224995
chr2	72	p2	(TC)5	10	225017	225026
chr2	73	p2	(AT)5	10	233990	233999
chr2	74	p4	(GGAA)3	12	235302	235313

## Sheet: Table S1B
Table S1B. Statistics of tandem repeats
NO.	Chr	Size	Copy	Repeat sequence	Percent Matches	Start	End
1	chr1	28	2.3	GCGAACAAAACTCCAGTCGCGCTACCT	83	9803	9864
2	chr1	24	2	AATAAACAACTCCGGTTAGCAACG	91	13649	13696
3	chr1	14	2.1	ATTCCATTCATTAG	100	13876	13904
4	chr1	23	1.9	ACGGGAGCTTGAGAATAGGGGCG	90	15542	15585
5	chr1	28	2.8	AAAACTCCAGTGCGCCCTAGCTGCGAAC	94	38632	38708
6	chr1	22	2	TTACTATACCTTCACTCGCTCG	81	42464	42506
7	chr1	17	2.2	CATCATTAGGCTCGACT	100	86551	86588
8	chr1	21	2.6	TAAGCTGTAGTCTATTGACTTG	74	109239	109293
9	chr1	21	3	TAGTAGCTCCTCTGATAGTAGC	77	161030	161094
10	chr1	24	1.9	TCTTCTAGTGAAAAACTAGCCTCT	100	170466	170511
11	chr1	24	2.2	CTTCTAGTGAAAAACTAGCCTCTA	90	170467	170520
12	chr1	15	2	GCAGATAGATAAAAG	100	170669	170698
13	chr1	13	2.3	AAAAAAGAGGAAG	100	208383	208412
14	chr1	17	2.4	TAGCTATAAAGAATAAT	86	220682	220721
15	chr1	28	2.3	ACGACAGTTTCGACAGTTGGAACGATT	81	236038	236101
16	chr1	17	2	TCTCACAACTCTCATAC	88	247390	247423
17	chr1	25	1.9	ACTTTGAGGCCAAATCAAGGGCAT	86	248857	248903
18	chr1	13	2.2	AGATAGACTGGAA	100	258278	258305
19	chr1	70	1.9	CTTTTCCACTAATAAGACGGAGATCCAAATGATCACTTTATGAAACCCCGTCTTTTTCATTAAATTGG	80	288279	288413
20	chr1	24	2.7	CTAGGAGAAGGCTATTGATCTAGT	88	288574	288637
21	chr1	23	2	TACCGTCTTACTTGACTTGCTTG	95	305256	305302
22	chr1	18	2	ACTTGCTTCATTAACTGC	94	305337	305372
23	chr1	11	3.5	CTTATCTCTTC	96	315142	315179
24	chr1	21	3.1	GTGGCAGAGAAATACAAAGAT	75	318657	318720
25	chr1	16	2	TTCAGTGCTAGTGATG	93	361726	361757
26	chr1	21	1.9	TATCACAACCAAGAAAGCCCT	84	361921	361960
27	chr1	21	2.8	CAGCCTCGCCGAGTACACTC	78	382169	382228
28	chr1	22	2	AGCGCATTCTAGCAAAGAGAAGA	87	390989	391034
29	chr1	16	1.9	GGATTCCATCTTATGGA	93	399554	399585
30	chr1	18	2	TTCCCACTGCACTTCTTG	100	400723	400758
31	chr1	19	2.2	AATGGCTAAGGACCGAATC	90	411616	411655
32	chr1	14	2.2	AGGCGATCGTAGTG	100	421831	421861
33	chr1	16	2.4	GGGAATCAAAGCGGAA	91	421874	421911
34	chr1	27	2.1	AAACTAAGGAAGTTGGCCTTCAAAACA	87	426232	426289
35	chr1	30	3.8	CTCGCCCTTTAGGGAGAGGGGAGAAAAAAA	100	466977	467089
36	chr1	18	2.1	GCGGCCTTCTTCCCAATC	90	492140	492177
37	chr1	13	3	CAACTCATTCAGT	76	515206	515244
38	chr1	14	2.3	GCTTACTCAACCACC	89	521322	521354
39	chr1	16	2.9	CACTGCTTTCTGCAC	86	528947	528990
40	chr1	14	2.6	GCTTTCTGCACGCACG	84	528951	528990
41	chr1	2	24	TA	86	552790	552837
42	chr1	13	2.1	TATAGGCATTCAT	100	604384	604410
43	chr1	16	2	CTGCCCATTGATTCAG	93	671890	671921
44	chr1	26	2.7	CCCCCTATACAAATAGTAGGCGCACA	86	684080	684149
45	chr1	13	1.9	ATAAGGCCCTTTC	100	688003	688027
46	chr1	20	2.8	GCCTACTATTACCTGCTATT	97	689413	689467
47	chr1	10	4.6	GCCTACTATT	77	689413	689458
48	chr1	17	2.1	TAGTAGGCCAACCTATC	94	693349	693383
49	chr1	19	2	CTAGGGAGAGGGGAAAGAG	94	708198	708235
50	chr1	26	2.5	AGAAAGAAAGGTTGTCAGTGCGGGTA	100	711395	711458
51	chr1	20	2.2	GCTTCACGTAAGTGCTTCTA	92	717903	717947
52	chr1	12	3.5	GAAGAAAAAAAA	100	722029	722070
53	chr1	21	2	TTAGTACCAGCCCTTACCCCC	86	724069	724111
54	chr1	21	1.9	GTATCAGGTTCTCTCCCCTA	89	724147	724185
55	chr1	18	2.6	CTACTCCTACTCCTAACC	86	797096	797142
56	chr1	16	1.9	ATCTATCAATCCATCG	93	800829	800859
57	chr1	16	2.5	AGAGATCTTATTTGAT	95	805014	805052
58	chr1	21	2	GTTGGGTTTTCCCTCTCTCAT	100	806948	806989
59	chr1	16	2	TGAGCTATTTCCAAAA	100	811570	811601
60	chr1	18	2.2	CTGGCATCCAATCCATAC	95	889239	889277
61	chr1	15	2	CTTTACCCAATAGAA	93	890868	890897
62	chr1	15	2.3	TAGAAGACCCAGACC	89	893013	893046
63	chr1	6	17.8	ACCTAG	77	894020	894126
64	chr1	24	3.7	ACCTAGACCTGGACCTAGAGCTTG	92	894038	894126
65	chr1	21	2.7	ATCCAGATGGGGAAGGTGGCT	100	894500	894556
66	chr1	48	2	TCCAGATGGAGACAGCTATCCACCAGATGAAGAAGGTACATATCCAAC	81	895486	895581
67	chr1	24	2.1	GCTTAAACAGCCTTGAGATAAGAA	96	898812	898862
68	chr1	12	2.2	GATCCAATAGTA	100	900968	900994
69	chr1	18	2	CCAGACTTATTAGATATC	100	909223	909258
70	chr1	13	2.6	TTTAGTTTTCTGA	90	948155	948188
71	chr1	43	2	ACCGATCCCTCCAACATAATATGACTCGTATAGGCTGTCCCAC	95	953863	953948
72	chr1	18	2.1	TGCAGCTTACTATTCCTA	100	954029	954065
73	chr1	46	1.9	TTCTTGTTTGTAGCTTACACCATGGAATTAAAGTGATTATCTACCCT	84	956698	956788
74	chr1	15	2.7	CTAGCTGACAGGGGA	84	983105	983144
75	chr1	30	2.1	AGACCCTCTCCCTTTCGGTCGAGATCTTGA	96	986377	986439
76	chr1	16	1.9	AGTAAGAGACGAAGCC	93	986648	986678
77	chr1	20	2	CTCGATTCCTATTATTTATA	100	1014648	1014687
78	chr1	35	1.9	CCCTTAAACAGTAGGCGGTCTAACCTCTCCCCGT	90	1063487	1063552
79	chr1	30	2.6	CAACGGGAGAGGAAGGAGCAGATGCTCGAC	97	1078128	1078205
80	chr1	22	2.2	CGGCGCCCTATTATTTCAGGGG	92	1082211	1082258
81	chr1	27	2.6	GGGGTTTAGCTACTGACCGATAGGTCA	97	1088637	1088705
82	chr1	13	2.2	CGTAGCTCTCTTAC	94	1093202	1093231
83	chr1	14	2	TATTGCAAGCAACC	100	1125561	1125588
84	chr1	30	2	CTGTTGTTTGATCAGCAGGGAAAGTCGTTC	93	1128846	1128906
85	chr1	15	2	TTCCTATCCCAGTAG	93	1131420	1131449
86	chr1	15	2.8	AGGTACCGGCTGAGA	81	1175142	1175183
87	chr1	13	2	ACAGTTAAGAAAG	100	1244680	1244705
88	chr1	24	1.9	ATTGGATTGTGCCAAGCGGAACTC	95	1263465	1263510
89	chr1	17	2.5	AGGAAATCTTTATTTAT	84	1278866	1278908
90	chr1	33	2.4	TTATCCCTAAAGAGTCACACTATAGTAGGGGTA	93	1302613	1302690
91	chr1	14	2.7	CAGACAATCTTATG	87	1319048	1319084
92	chr1	19	2.1	ATATACGTGAACACTACTC	100	1344915	1344953
93	chr1	21	2	CTGTAGGGTATGCTGGACAAG	95	1348286	1348327
94	chr1	16	2.7	AGGGAATCAAAGCAAA	85	1355073	1355115
95	chr1	13	2.1	TCCGAAACACCTA	100	1355754	1355780
96	chr1	44	2	AATATCAGGATCGGGTCGACCAGGTCAGGCCAGATCATGAGTGA	95	1374047	1374135
97	chr1	13	2.7	TCGCTTGCTGCCT	90	1377438	1377472
98	chr1	16	2.1	GCTAGCAGTTGCTTAGTA	90	1415793	1415828
99	chr1	17	2.1	ATGGCAAGCGCTACCTC	94	1419432	1419466
100	chr1	22	2	CGTGAACAACATGCGAAGTTGG	85	1423131	1423173
101	chr1	14	2.4	GATAAGCTAGATTA	90	1428657	1428690
102	chr1	24	1.9	CTAAGATGATCATATGTAGTTTG	90	1431219	1431262
103	chr1	43	2	ATATATAAGAGAAGAGAAGCATTCTCTTGTAGCTTGATTTTG	95	1431368	1431450
104	chr1	25	2.2	CTTATTGTAGTTCTTCTCTTGCTTGC	84	1465827	1465881
105	chr1	6	9.3	TATCTA	84	1471909	1471960
106	chr1	10	5.7	TATCTATCTA	76	1471905	1471959
107	chr1	16	3.5	TATCTATATCTATCTA	95	1471905	1471960
108	chr1	13	2.2	ATAGTCACTGCCA	100	1473655	1473683
109	chr1	17	2.9	TAGTAAAGGCCAATTGA	87	1474919	1474965
110	chr1	15	2.1	CTTCAGAGATACCTT	100	1479342	1479373
111	chr1	17	2	TCAAAGTCGACTACCCT	88	1483618	1483651
112	chr1	15	2.1	AACTACTCGCTCTGG	93	1490443	1490473
113	chr1	18	2.3	TGAACAGAGGCACCAAAA	87	1522036	1522077
114	chr1	17	1.9	AGTTGAAGACCCTTTAGA	88	1544146	1544179
115	chr1	25	2	ATTCCAACCCCTACCATTAGAAT	84	1546433	1546480
116	chr1	20	2.1	CTCCTTAATGACCAGACTTCG	82	1547861	1547903
117	chr1	15	2.1	TCATAGCCGCGAGAGC	88	1549760	1549792
118	chr1	15	3	CTAGCTATAGGAAGG	84	1564667	1564711
119	chr1	15	3.5	GACATGCTCCTGAAC	80	1608875	1608928
120	chr1	15	2.7	AAGAATAGCTACCG	80	1611081	1611119
121	chr1	15	2	AGATAGATTGCCAAC	93	1611606	1611635
122	chr1	18	2.2	TAGAAAGAAGTTCTTGAT	100	1612741	1612779
123	chr1	28	2.8	AAAACTCCAGTGCGCCCTAGCTGCGAAC	94	1622968	1623044
124	chr1	22	2	AGGCAGCATTTTACTGCGGCTC	86	1646083	1646126
125	chr1	12	2.6	GGGAAGATCATT	100	1677704	1677734
126	chr1	16	1.9	TATCCCGATATCATGA	93	1679171	1679201
127	chr1	16	2	TTCCTTATAAGAACTA	100	1679676	1679707
128	chr1	16	2.1	TTTGTCCTGTTAGCGCC	94	1684477	1684510
129	chr1	18	2.6	CTACTCCTACTCCTAACC	86	1692330	1692376
130	chr1	16	1.9	ATCTATCAATCCATCG	93	1696063	1696093
131	chr1	16	2.5	AGAGATCTTATTTGAT	95	1700248	1700286
132	chr1	21	2	GTTGGGTTTTCCCTCTCTCAT	100	1702182	1702223
133	chr1	16	2	TGAGCTATTTCCAAAA	100	1706804	1706835
134	chr1	19	2.7	AACCTCTCTTTCCTGCGAG	72	1713765	1713816
135	chr1	16	3.1	TATAATTATATTAT	82	1737431	1737475
136	chr1	16	3.7	TATATTATTATAATTA	88	1737437	1737496
137	chr1	12	6.1	TATAAATATAA	76	1737461	1737530
138	chr1	9	5.7	ATAATATAA	77	1737478	1737528
139	chr1	23	2.8	ATAATATTATTAATATAATATAA	86	1737462	1737530
140	chr1	36	2.8	TATAATATATTAATATAATATAAATAATATTATAA	80	1737431	1737528
141	chr1	13	2.2	ATAAAAATTCTAT	100	1737536	1737564
142	chr1	26	2.8	AAAGAGGCTATTATCTCATTCTAGAG	100	1752821	1752893
143	chr1	20	3	AAGTGATGATATGCGCTATT	97	1753260	1753319
144	chr1	14	2	TTGGTAAGGATAAA	100	1765633	1765660
145	chr1	23	2.1	GGGATGGGAGCCAAAGCAGTATG	88	1800976	1801023
146	chr1	17	2	CGAGATTGGTTTAGTTA	88	1815112	1815145
147	chr1	17	2	AGTGAATGAAGGAACGA	88	1816780	1816813
148	chr1	15	2.1	TGGGATCCAGTCCCT	100	1831799	1831830
149	chr1	25	1.9	TCGACTGTTAAGGACACAGAGGGGA	86	1853981	1854028
150	chr1	22	2	AGCTAATTACCTGCAAGATAGTT	81	1896594	1896637
151	chr1	23	2.6	TAGACTGGTGCGATCCCTAAGTT	83	1914905	1914963
152	chr1	30	3	TTGGAAGCTCGAATCAACTAGCCTTGATGG	96	1915437	1915525
153	chr1	24	3.6	CCTATCTCTTAAAGGCTTCTTAGC	92	1924709	1924796
154	chr1	54	1.9	GCTGAGCACTTTCATTATCTTTCTTGTCAAGCTGCTCCTGCAGATACTTCATAC	96	1924965	1925069
155	chr1	9	4.1	TTCATATTT	96	1927637	1927673
156	chr1	18	2.1	TTGTTCTTATCCCGATCT	95	1929830	1929867
157	chr1	21	8.8	CGTAGCATGCCAACGGAAGAA	81	1930763	1930952
158	chr1	68	3.2	CCGTACCATGCCAACGGAAGAACGTAGCATGCCAACGGAAGAACGTAGCATGCCAACGGAATAAGCTA	78	1930762	1930976
159	chr1	21	2.1	CATAATCGAACTCGGAAGCAA	83	1939718	1939761
160	chr1	27	2.7	AGGACCAGCACCATAAGCTGGGGTTGC	93	1940333	1940404
161	chr1	17	2	ATATCCACTATACCTCT	100	1955201	1955234
162	chr1	21	1.9	GGAAGAGGTGGTCAACAACAGG	95	1978962	1979002
163	chr1	21	2	TTGGAGGAACTCACTCGGAAG	90	1997750	1997790
164	chr1	14	2.5	TCTGTCATAACTTA	100	2000160	2000194
165	chr1	21	2.6	TTAGTGTATCGATATACAGCA	88	2001648	2001702
166	chr1	21	2	GTTCATAACGATGGCTAACCT	90	2003191	2003232
167	chr1	15	2.8	GATCGCTTACCAGTAAAG	75	2003535	2003581
168	chr1	23	1.9	GTAAACAGGAGATGCAGGGACGA	90	2003640	2003683
169	chr1	21	4.9	GTGGTCAAGTTTGACAGAGGG	73	2005057	2005164
170	chr1	37	2	GGGATTGAAATAGAGGAATTGGATGGTTCCTGCGTAG	91	2006650	2006723
171	chr1	41	1.9	TAAACAGGTAATGCTGGTTGCGAAGATCGAGCATGATGCCAT	97	2006770	2006848
172	chr1	47	2	CTCTTCTCTCCCTTGCAATCTGCGCCTTTACCAGGCATTCCATCCAA	95	2006945	2007040
173	chr1	53	2	TGAATCTAGCCCTTGGCTTATTGATTGGTAGCACCCTTCCAATTCAATGGGTGGGCGG	85	2007058	2007171
174	chr1	20	2.5	GCATCTGTCACTCGAGAGTC	96	2007706	2007755
175	chr1	20	2.9	GCATCTGTCAATCGAGAGTC	92	2007706	2007763
176	chr1	20	2.9	GAGAGTCGCATCTGTCACTC	76	2007794	2007850
177	chr1	15	3.2	CACCGTCGCATCTGT	75	2007833	2007884
178	chr1	19	3.5	TGTCATCCCCGTCGCATC	75	2007826	2007888
179	chr1	21	2.1	GGGTGGGAGCCAAAGCAATAT	82	2010997	2011040
180	chr1	15	2.1	TGATACTATTACGTA	94	2012670	2012701
181	chr1	18	2.1	CTTCAGTTGATTCCGTTT	94	2047565	2047601
182	chr1	33	2.2	GTGAGTGAGATTCAAATAAGTAACTACGTTC	81	2055208	2055279
183	chr1	17	2	TCAAAGTCGACTACCCT	88	2108282	2108315
184	chr2	21	2.4	GTGGTCAAAAGTGTAATAGAG	89	8979	9028
185	chr2	18	2.6	AAGTGGTCAATTGTGTCA	86	9090	9135
186	chr2	13	2.6	GGAAGTCAAGAAT	90	11750	11783
187	chr2	11	2.5	GATAGAAGATCG	88	13524	13552
188	chr2	13	1.9	ACCACAAACAAAT	100	26174	26198
189	chr2	18	2.4	GACTATGAAACAGATCGC	81	37556	37598
190	chr2	20	2	AAAGTCTGATCCTATAAGCG	100	47035	47074
191	chr2	70	2.5	TTTATGCCAAAAATACGGGGTTTCCTAAACGATTCCACTTTTGAACGAACTCTTATGAGTGGAAAAGCAC	85	71921	72095
192	chr2	27	2.1	TATTATTAGAAGCCCTTTTCCCCTTAT	96	94132	94188
193	chr2	30	2	CTATTATTAGAGATGTCTCAATTCATTAGG	93	107916	107975
194	chr2	42	2.2	TCACGATCACGACTGCGATCTCTTTCATCGTCTCGATCACGA	84	119017	119108
195	chr2	14	2.5	AGGACGGTATTCGT	90	128573	128606
196	chr2	40	1.9	CGCTCGGGTCACATACCTATCCCTTCTCTCAATTGAATGA	97	140283	140358
197	chr2	2	17	TA	93	157073	157106
198	chr2	18	2.4	ATCTTTCTTTCTCTATCT	80	169142	169184
199	chr2	13	2.7	TCGCTTGCTGCCT	90	185780	185814
200	chr2	22	2	CGGAGGCTAATCGGACACGCAAT	86	206922	206966
201	chr2	28	2	TGGAAGTAGTATAGTCAATTGCTCCGTAG	83	217448	217505
202	chr2	17	2	AGCGTAGGTCCTTCTAT	94	218669	218702
203	chr2	15	3	CTATCGTGAGCAGC	80	224656	224697
204	chr2	21	2.1	GGGCAAGCAAGTGATTAGAGA	95	225820	225863

## Sheet: Table S1C
Table S1C. Statistics of dispersed repetitive sequences
#Chr1	Chr2	type	alignment length	similarity	start1	end1	start2	end2	evalue
chr1	chr1	F	23862	100	1686251	1710112	791017	814878	0
chr1	chr1	F	6183	100	2105915	2112097	1481251	1487433	0
chr1	chr1	P	630	99.365	1796916	1797545	1677716	1678345	0
chr1	chr1	P	595	100	1950177	1950771	1884321	1884915	0
chr1	chr1	F	858	88.811	2015559	2016377	1967444	1968282	0
chr1	chr1	F	623	94.864	919092	919714	326749	327369	0
chr1	chr1	F	605	95.537	172524	173126	126862	127463	0
chr1	chr1	P	473	100	1528038	1528510	857382	857854	0
chr1	chr1	P	459	97.168	1849658	1850110	462215	462672	0
chr1	chr1	P	465	96.344	922591	923055	57518	57982	0
chr1	chr1	P	429	98.601	1238856	1239284	1201803	1202231	0
chr1	chr1	F	448	96.875	645434	645879	387200	387644	0
chr1	chr1	P	401	99.751	1371013	1371413	61322	61722	0
chr1	chr1	F	361	100	1771114	1771474	1402870	1403230	0
chr1	chr1	P	468	92.094	1078727	1079193	126831	127295	0
chr1	chr1	P	474	91.772	126831	127301	1078721	1079193	0
chr1	chr1	F	576	87.5	2039945	2040502	228224	228787	3.83e-180
chr1	chr1	F	1275	75.765	490889	492153	394231	395495	2.98e-176
chr1	chr1	P	336	100	1638543	1638878	77793	78128	3.85e-175
chr1	chr1	P	333	100	921229	921561	192982	193314	1.79e-173
chr1	chr1	P	436	91.972	1078727	1079162	172524	172959	2.32e-172
chr1	chr1	P	442	91.629	172524	172965	1078721	1079162	2.32e-172
chr1	chr1	F	723	82.296	2112387	2113100	82277	82990	8.34e-172
chr1	chr1	F	468	90.385	1837022	1837478	141562	142025	5.02e-169
chr1	chr1	F	471	89.809	1822547	1823011	111726	112188	3.02e-166
chr1	chr1	F	444	91.216	1866763	1867206	174081	174508	1.09e-165
chr1	chr1	F	941	78.002	2121230	2122165	490273	491209	1.82e-163
chr1	chr1	F	335	97.612	1371401	1371735	280608	280942	3.04e-161
chr1	chr1	F	323	98.762	2121842	2122164	394228	394550	3.04e-161
chr1	chr1	F	606	84.818	1823005	1823573	112238	112836	1.42e-159
chr1	chr1	F	497	88.33	1418595	1419079	265155	265627	6.58e-158
chr1	chr1	P	527	87.476	1354255	1354748	1252555	1253067	6.58e-158
chr1	chr1	P	521	87.716	1252561	1253067	1354255	1354742	6.58e-158
chr1	chr1	P	307	99.674	1377091	1377397	540184	540490	2.37e-157
chr1	chr1	P	346	96.243	100214	100557	71977	72317	8.52e-157
chr1	chr1	P	309	99.353	1258078	1258386	192251	192559	8.52e-157
chr1	chr1	P	336	96.429	1150381	1150716	441125	441460	3.96e-155
chr1	chr1	F	288	100	814742	815029	462435	462722	1.86e-148
chr1	chr1	P	429	89.51	1736034	1736453	527945	528365	8.64e-147
chr1	chr1	P	397	89.924	824964	825359	670881	671270	4.05e-140
chr1	chr1	P	302	97.02	878607	878908	97107	97400	5.24e-139
chr1	chr1	P	305	96.721	97107	97403	878604	878908	5.24e-139
chr1	chr1	P	334	93.713	1003291	1003624	343696	344027	1.88e-138
chr1	chr1	P	321	94.704	343707	344027	1003291	1003611	1.88e-138
chr1	chr1	F	278	98.561	1622960	1623237	38624	38901	3.15e-136
chr1	chr1	P	263	99.62	1383591	1383853	158033	158295	6.82e-133
chr1	chr1	P	282	97.163	1359558	1359839	174584	174865	8.82e-132
chr1	chr1	F	252	100	1828710	1828961	89747	89998	1.91e-128
chr1	chr1	F	251	100	1626154	1626404	736401	736651	6.87e-128
chr1	chr1	P	244	100	2046934	2047177	1826520	1826763	5.35e-124
chr1	chr1	P	255	98.039	194938	195192	34057	34308	1.16e-120
chr1	chr1	P	252	98.413	34060	34308	194938	195189	1.16e-120
chr1	chr1	F	315	92.698	1273537	1273835	648195	648509	1.16e-120
chr1	chr1	P	238	100	1849658	1849895	814742	814979	1.16e-120
chr1	chr1	P	259	96.911	1497333	1497591	140605	140863	5.39e-119
chr1	chr1	P	245	98.776	276841	277085	206650	206892	5.39e-119
chr1	chr1	F	238	99.58	738125	738361	29047	29284	1.94e-118
chr1	chr1	F	244	97.951	1367855	1368098	280514	280757	1.17e-115
chr1	chr1	P	290	92.759	1209498	1209781	858954	859243	7.02e-113
chr1	chr1	P	287	93.031	858957	859243	1209498	1209778	7.02e-113
chr1	chr1	P	292	92.466	1304825	1305102	732143	732434	4.22e-110
chr1	chr1	P	220	99.091	1591472	1591691	41001	41220	2.54e-107
chr1	chr1	F	292	92.123	1956276	1956550	1360212	1360503	2.54e-107
chr1	chr1	P	324	89.198	2045095	2045418	1228698	1229008	3.29e-106
chr1	chr1	F	232	96.983	1639628	1639858	540710	540941	4.25e-105
chr1	chr1	F	210	99.524	1079229	1079437	1063202	1063411	7.12e-103
chr1	chr1	F	205	100	543285	543489	35238	35442	2.56e-102
chr1	chr1	F	298	90.268	1146602	1146891	444062	444355	2.56e-102
chr1	chr1	P	228	96.053	1817584	1817811	1365933	1366160	4.28e-100
chr1	chr1	P	210	98.571	1376547	1376755	1131813	1132022	1.54e-99
chr1	chr1	P	200	99.5	1602502	1602701	1357600	1357799	7.17e-98
chr1	chr1	F	196	100	1095510	1095705	520530	520725	2.58e-97
chr1	chr1	F	213	97.653	2014161	2014373	1212627	1212835	2.58e-97
chr1	chr1	F	1248	72.436	1557619	1558843	739315	740542	3.33e-96
chr1	chr1	P	192	100	1003604	1003795	625810	626001	4.31e-95
chr1	chr1	P	195	99.487	625810	626004	1003601	1003795	4.31e-95
chr1	chr1	F	312	87.821	1140916	1141217	631140	631445	5.58e-94
chr1	chr1	F	333	86.486	1891197	1891516	1672758	1673083	7.22e-93
chr1	chr1	P	187	100	472224	472410	41217	41403	2.60e-92
chr1	chr1	P	503	80.517	1749439	1749919	1111519	1111996	3.36e-91
chr1	chr1	P	411	83.212	1821361	1821766	1185724	1186097	4.34e-90
chr1	chr1	P	414	83.092	1185724	1186100	1821358	1821766	4.34e-90
chr1	chr1	F	179	100	989322	989500	33835	34013	7.27e-88
chr1	chr1	F	214	94.86	980641	980851	91264	91477	7.27e-88
chr1	chr1	F	181	99.448	1000921	1001101	876209	876389	2.61e-87
chr1	chr1	P	230	92.609	1528500	1528717	856954	857182	5.66e-84
chr1	chr1	P	194	96.392	1369441	1369633	479051	479242	2.04e-83
chr1	chr1	F	228	92.544	2030852	2031074	1002127	1002347	2.04e-83
chr1	chr1	F	274	87.956	1813612	1813881	554875	555139	9.47e-82
chr1	chr1	P	170	99.412	1269583	1269752	2244	2413	3.41e-81
chr1	chr1	F	888	73.874	1433828	1434686	1383366	1384229	4.41e-80
chr1	chr1	P	354	83.898	2025437	2025780	1580657	1580984	4.41e-80
chr1	chr1	F	216	91.667	1751235	1751449	34082	34297	7.37e-78
chr1	chr1	F	202	93.069	592410	592611	188527	188728	2.65e-77
chr1	chr1	F	193	94.301	1595799	1595991	1160507	1160699	2.65e-77
chr1	chr1	P	216	91.667	2043794	2044008	61452	61662	9.54e-77
chr1	chr1	P	229	90.393	61457	61682	2043778	2044001	9.54e-77
chr1	chr1	P	157	100	1497330	1497486	1183107	1183263	1.23e-75
chr1	chr1	P	179	96.089	2025804	2025982	1591310	1591487	1.23e-75
chr1	chr1	F	229	89.956	2043778	2044001	1371053	1371278	4.44e-75
chr1	chr1	F	216	91.204	1993516	1993725	193316	193530	1.60e-74
chr1	chr1	F	155	100	2056622	2056776	420785	420939	1.60e-74
chr1	chr1	P	155	100	1641607	1641761	751717	751871	1.60e-74
chr1	chr1	P	225	89.778	1842371	1842591	196396	196619	2.06e-73
chr1	chr1	P	173	95.954	1372158	1372330	17004	17176	7.43e-73
chr1	chr1	P	216	90.278	1751241	1751452	194946	195161	2.67e-72
chr1	chr1	P	219	89.954	194949	195167	1751235	1751449	2.67e-72
chr1	chr1	P	182	94.505	722372	722551	638579	638758	9.61e-72
chr1	chr1	P	273	85.714	1646304	1646570	1163456	1163722	9.61e-72
chr1	chr1	P	264	86.364	1163465	1163722	1646304	1646561	9.61e-72
chr1	chr1	P	153	99.346	480203	480355	38799	38950	3.45e-71
chr1	chr1	F	293	85.324	1954707	1954975	1164819	1165101	4.47e-70
chr1	chr1	P	163	96.933	989167	989329	540941	541099	1.61e-69
chr1	chr1	P	173	95.376	540941	541107	989157	989329	1.61e-69
chr1	chr1	F	181	93.923	1362038	1362218	1206762	1206939	1.61e-69
chr1	chr1	F	215	90.233	2081386	2081591	1433255	1433464	5.78e-69
chr1	chr1	F	150	98.667	1371401	1371550	1367949	1368098	2.08e-68
chr1	chr1	F	143	100	1421387	1421529	391749	391891	7.48e-68
chr1	chr1	P	143	100	1766311	1766453	427176	427318	7.48e-68
chr1	chr1	P	191	92.147	1222605	1222789	1018601	1018791	7.48e-68
chr1	chr1	P	146	99.315	1722450	1722595	1384253	1384398	7.48e-68
chr1	chr1	P	184	91.848	825466	825649	670623	670806	1.25e-65
chr1	chr1	F	137	100	1709976	1710112	462435	462571	1.62e-64
chr1	chr1	P	137	100	1849759	1849895	1709976	1710112	1.62e-64
chr1	chr1	F	140	99.286	2054669	2054808	569482	569620	5.82e-64
chr1	chr1	F	140	99.286	1830533	1830672	1509999	1510137	5.82e-64
chr1	chr1	P	135	99.259	926741	926875	199802	199936	9.74e-62
chr1	chr1	P	148	96.622	1045213	1045360	547593	547739	9.74e-62
chr1	chr1	F	154	94.805	1183107	1183260	140710	140863	1.26e-60
chr1	chr1	F	186	90.323	2054095	2054279	197057	197239	1.26e-60
chr1	chr1	F	130	100	2082303	2082432	1045781	1045910	1.26e-60
chr1	chr1	P	356	79.494	1990235	1990574	399133	399488	4.53e-60
chr1	chr1	F	148	95.946	1904466	1904612	1249563	1249710	4.53e-60
chr1	chr1	F	151	94.702	1212256	1212406	198950	199100	5.86e-59
chr1	chr1	F	221	86.425	1879369	1879580	152032	152252	2.11e-58
chr1	chr1	F	129	99.225	485359	485487	480265	480393	2.11e-58
chr1	chr1	F	124	100	420672	420795	391747	391870	2.73e-57
chr1	chr1	F	748	72.594	750859	751596	503400	504139	2.73e-57
chr1	chr1	P	221	85.52	1973497	1973715	840699	840917	9.81e-57
chr1	chr1	P	227	85.022	840699	840923	1973491	1973715	9.81e-57
chr1	chr1	F	122	100	1421387	1421508	420674	420795	3.53e-56
chr1	chr1	F	155	93.548	1984806	1984954	1868322	1868476	3.53e-56
chr1	chr1	P	123	99.187	2111885	2112007	264834	264956	4.57e-55
chr1	chr1	P	123	99.187	1487221	1487343	264834	264956	4.57e-55
chr1	chr1	P	196	87.755	580090	580283	536133	536323	4.57e-55
chr1	chr1	F	127	96.85	1433290	1433416	485358	485484	2.75e-52
chr1	chr1	P	123	97.561	618686	618808	137281	137403	9.88e-52
chr1	chr1	F	120	98.333	1751478	1751597	280167	280286	9.88e-52
chr1	chr1	P	143	93.706	1157136	1157278	281380	281518	9.88e-52
chr1	chr1	P	120	98.333	137284	137403	618686	618805	9.88e-52
chr1	chr1	F	166	90.361	1357888	1358053	1189686	1189841	3.55e-51
chr1	chr1	F	158	91.139	100756	100909	72806	72958	4.60e-50
chr1	chr1	F	126	96.032	1433291	1433416	480265	480390	4.60e-50
chr1	chr1	F	136	94.118	1628091	1628226	1433291	1433421	5.95e-49
chr1	chr1	P	111	99.099	1056833	1056943	280135	280245	2.14e-48
chr1	chr1	F	129	94.574	1814550	1814678	1373362	1373490	2.14e-48
chr1	chr1	F	114	98.246	1831864	1831977	1434950	1435063	2.14e-48
chr1	chr1	P	217	84.332	1989828	1990041	575640	575840	9.95e-47
chr1	chr1	F	104	100	989254	989357	84083	84186	3.58e-46
chr1	chr1	F	104	100	1239183	1239286	108433	108536	3.58e-46
chr1	chr1	F	114	97.368	478726	478838	331990	332102	3.58e-46
chr1	chr1	F	143	91.608	1628079	1628221	480253	480390	3.58e-46
chr1	chr1	F	118	95.763	1273877	1273994	648500	648617	1.29e-45
chr1	chr1	P	121	95.041	1663495	1663615	1033329	1033449	1.29e-45
chr1	chr1	F	111	97.297	1376469	1376579	708457	708567	4.63e-45
chr1	chr1	P	137	91.971	1760159	1760293	934752	934886	4.63e-45
chr1	chr1	P	104	99.038	1153317	1153420	942955	943058	1.67e-44
chr1	chr1	P	121	95.041	1354725	1354841	1251578	1251698	1.67e-44
chr1	chr1	P	118	95.763	1251581	1251698	1354725	1354838	1.67e-44
chr1	chr1	P	112	96.429	485395	485506	38660	38771	5.99e-44
chr1	chr1	P	112	96.429	1622996	1623107	485395	485506	5.99e-44
chr1	chr1	P	100	100	982429	982528	658994	659093	5.99e-44
chr1	chr1	F	99	100	100682	100780	72590	72688	2.15e-43
chr1	chr1	P	102	99.02	1201803	1201904	108433	108534	2.15e-43
chr1	chr1	P	102	99.02	1404964	1405065	549489	549590	2.15e-43
chr1	chr1	F	99	100	1531934	1532032	1084897	1084995	2.15e-43
chr1	chr1	F	194	84.536	1194123	1194306	281535	281726	7.75e-43
chr1	chr1	F	351	76.638	492488	492826	395845	396193	7.75e-43
chr1	chr1	P	104	98.077	1696046	1696149	725471	725574	7.75e-43
chr1	chr1	P	104	98.077	800812	800915	725471	725574	7.75e-43
chr1	chr1	P	99	98.99	480301	480399	38673	38771	1.00e-41
chr1	chr1	P	134	91.791	1992454	1992586	351457	351582	1.00e-41
chr1	chr1	F	96	100	838846	838941	402875	402970	1.00e-41
chr1	chr1	P	99	98.99	1623009	1623107	480301	480399	1.00e-41
chr1	chr1	P	388	75.515	2059758	2060139	1542378	1542758	1.00e-41
chr1	chr1	P	131	92.366	351460	351582	1992454	1992583	1.00e-41
chr1	chr1	F	131	91.603	1628091	1628221	485359	485484	3.60e-41
chr1	chr1	F	235	81.277	1613093	1613311	707937	708171	3.60e-41
chr1	chr1	F	147	89.116	1946808	1946954	1219118	1219257	3.60e-41
chr1	chr1	P	112	94.643	1977810	1977920	147976	148087	4.66e-40
chr1	chr1	P	92	100	1628079	1628170	38810	38901	1.68e-39
chr1	chr1	P	246	80.081	1480214	1480451	1134662	1134901	1.68e-39
chr1	chr1	P	91	100	1433291	1433381	38799	38889	6.03e-39
chr1	chr1	P	91	100	485359	485449	38799	38889	6.03e-39
chr1	chr1	P	123	91.87	910492	910614	93399	93517	6.03e-39
chr1	chr1	P	103	96.117	1623135	1623237	480253	480355	6.03e-39
chr1	chr1	F	155	86.452	540182	540333	152424	152577	2.17e-38
chr1	chr1	F	119	92.437	1480292	1480407	397749	397867	2.17e-38
chr1	chr1	P	93	98.925	1842229	1842321	1303877	1303969	2.17e-38
chr1	chr1	P	116	93.103	1640138	1640252	1465903	1466015	2.17e-38
chr1	chr1	P	95	97.895	1502182	1502276	309815	309909	7.80e-38
chr1	chr1	F	202	83.168	2081350	2081543	480203	480390	7.80e-38
chr1	chr1	F	148	87.838	878462	878599	536454	536601	7.80e-38
chr1	chr1	P	153	86.275	1377248	1377397	152426	152577	2.81e-37
chr1	chr1	P	95	97.895	1568510	1568604	1063551	1063644	2.81e-37
chr1	chr1	F	282	77.305	1432894	1433172	1383059	1383339	2.81e-37
chr1	chr1	F	136	88.971	1988842	1988972	107825	107958	1.01e-36
chr1	chr1	F	135	88.148	2050340	2050474	1756463	1756597	1.01e-36
chr1	chr1	P	95	96.842	152423	152517	78093	78187	3.63e-36
chr1	chr1	F	99	95.96	1679848	1679946	199294	199388	1.31e-35
chr1	chr1	P	100	95	1181837	1181936	924067	924166	1.31e-35
chr1	chr1	P	93	96.774	1623135	1623227	485357	485449	4.70e-35
chr1	chr1	P	126	89.683	1975725	1975849	557020	557141	4.70e-35
chr1	chr1	P	102	94.118	1628069	1628170	1623146	1623247	4.70e-35
chr1	chr1	P	83	100	1592780	1592862	34570	34652	1.69e-34
chr1	chr1	F	83	100	467007	467089	466977	467059	1.69e-34
chr1	chr1	F	304	77.303	2134761	2135060	743541	743821	1.69e-34
chr1	chr1	P	83	100	1172467	1172549	821458	821540	1.69e-34
chr1	chr1	P	103	94.175	1550733	1550835	836072	836171	1.69e-34
chr1	chr1	P	92	96.739	1308874	1308965	1158173	1158264	1.69e-34
chr1	chr1	P	86	98.837	821458	821543	1172464	1172549	1.69e-34
chr1	chr1	F	211	81.517	1578478	1578676	1213324	1213525	1.69e-34
chr1	chr1	P	92	96.739	1623135	1623226	1433290	1433381	1.69e-34
chr1	chr1	F	83	100	1903298	1903380	1499230	1499312	1.69e-34
chr1	chr1	P	86	98.837	34570	34655	1592777	1592862	1.69e-34
chr1	chr1	P	88	97.727	1461498	1461585	40717	40804	6.07e-34
chr1	chr1	P	100	94	1270754	1270853	567665	567764	6.07e-34
chr1	chr1	P	89	97.753	1082730	1082817	768515	768603	6.07e-34
chr1	chr1	P	96	95.833	768515	768608	1082723	1082817	6.07e-34
chr1	chr1	P	88	97.727	40720	40807	1461495	1461582	6.07e-34
chr1	chr1	F	81	100	280437	280517	278883	278963	2.18e-33
chr1	chr1	P	192	81.771	1810724	1810909	1114349	1114534	2.18e-33
chr1	chr1	P	81	100	1963560	1963640	1320893	1320973	2.18e-33
chr1	chr1	F	132	88.636	2081421	2081543	485358	485484	7.86e-33
chr1	chr1	P	83	98.795	571240	571322	502051	502133	7.86e-33
chr1	chr1	P	149	85.906	1622959	1623107	1433327	1433464	7.86e-33
chr1	chr1	P	148	85.811	1433327	1433463	38624	38771	2.83e-32
chr1	chr1	F	94	94.681	1986972	1987065	60388	60481	2.83e-32
chr1	chr1	F	109	91.743	1538655	1538763	61646	61748	2.83e-32
chr1	chr1	F	136	87.5	1072681	1072804	496112	496247	2.83e-32
chr1	chr1	P	106	92.453	614408	614508	591878	591983	2.83e-32
chr1	chr1	F	79	100	1628099	1628177	850166	850244	2.83e-32
chr1	chr1	P	233	78.112	1218155	1218386	873891	874122	2.83e-32
chr1	chr1	P	79	100	1751478	1751556	1056833	1056911	2.83e-32
chr1	chr1	P	242	77.686	873891	874131	1218146	1218386	2.83e-32
chr1	chr1	P	79	100	2062130	2062208	1505480	1505558	2.83e-32
chr1	chr1	P	82	98.78	1505480	1505561	2062127	2062208	2.83e-32
chr1	chr1	F	124	88.71	989032	989155	325532	325648	1.02e-31
chr1	chr1	F	90	95.556	1530548	1530637	808021	808110	1.02e-31
chr1	chr1	P	81	98.765	1911990	1912070	1008695	1008775	1.02e-31
chr1	chr1	F	131	87.786	1222365	1222495	1018487	1018608	1.02e-31
chr1	chr1	F	90	95.556	1703255	1703344	1530548	1530637	1.02e-31
chr1	chr1	P	78	100	1008698	1008775	1911990	1912067	1.02e-31
chr1	chr1	F	107	90.654	326698	326804	97382	97488	3.66e-31
chr1	chr1	P	83	97.59	512810	512892	344532	344614	3.66e-31
chr1	chr1	P	127	88.189	612555	612672	496034	496160	3.66e-31
chr1	chr1	P	99	92.929	580255	580353	536030	536127	3.66e-31
chr1	chr1	P	86	96.512	1503803	1503888	549367	549452	3.66e-31
chr1	chr1	P	133	87.218	496034	496166	612549	612672	3.66e-31
chr1	chr1	P	108	90.741	1621641	1621744	1372365	1372472	1.31e-30
chr1	chr1	P	75	100	1593037	1593111	224560	224634	4.73e-30
chr1	chr1	F	93	93.548	1940570	1940662	568120	568212	4.73e-30
chr1	chr1	F	96	92.708	1942170	1942265	568473	568568	4.73e-30
chr1	chr1	P	78	98.718	1922599	1922676	1270395	1270472	4.73e-30
chr1	chr1	P	88	95.455	1781725	1781812	1381794	1381880	4.73e-30
chr1	chr1	P	92	94.565	944674	944760	30872	30963	1.70e-29
chr1	chr1	F	127	87.402	1205053	1205170	81210	81336	1.70e-29
chr1	chr1	F	310	74.839	2059891	2060198	89371	89678	1.70e-29
chr1	chr1	P	78	98.718	1538655	1538732	1371013	1371089	1.70e-29
chr1	chr1	P	74	100	2078210	2078283	1494441	1494514	1.70e-29
chr1	chr1	P	367	73.842	2017381	2017741	68994	69354	6.12e-29
chr1	chr1	P	76	98.684	540941	541016	84083	84158	6.12e-29
chr1	chr1	P	73	100	1193422	1193494	184444	184516	6.12e-29
chr1	chr1	F	372	74.194	2121230	2121594	873697	874054	6.12e-29
chr1	chr1	P	143	84.615	1846909	1847044	1197593	1197734	6.12e-29
chr1	chr1	P	79	97.468	2115426	2115504	2089105	2089183	6.12e-29
chr1	chr1	P	72	100	850166	850237	38810	38881	2.20e-28
chr1	chr1	P	84	95.238	309844	309927	224222	224305	2.20e-28
chr1	chr1	F	72	100	850166	850237	480273	480344	2.20e-28
chr1	chr1	F	72	100	850166	850237	485367	485438	2.20e-28
chr1	chr1	P	78	97.436	2110316	2110393	499514	499591	2.20e-28
chr1	chr1	P	78	97.436	1485652	1485729	499514	499591	2.20e-28
chr1	chr1	F	72	100	1433299	1433370	850166	850237	2.20e-28
chr1	chr1	P	92	93.478	1766428	1766516	1198252	1198342	2.20e-28
chr1	chr1	F	173	81.503	1895599	1895763	1407802	1407972	2.20e-28
chr1	chr1	F	93	93.548	1990749	1990837	1635544	1635635	2.20e-28
chr1	chr1	P	72	100	1198271	1198342	1766428	1766499	2.20e-28
chr1	chr1	P	79	97.468	2119033	2119110	2089106	2089183	2.20e-28
chr1	chr1	F	82	96.341	2119030	2119110	2115423	2115503	2.20e-28
chr1	chr1	P	193	79.275	738706	738896	22338	22528	7.91e-28
chr1	chr1	F	81	96.296	964860	964940	34395	34474	7.91e-28
chr1	chr1	P	105	89.524	666142	666245	626030	626133	7.91e-28
chr1	chr1	P	165	81.212	22377	22539	738693	738857	7.91e-28
chr1	chr1	P	82	96.341	1833063	1833141	826051	826132	7.91e-28
chr1	chr1	P	71	100	1623146	1623216	850167	850237	7.91e-28
chr1	chr1	P	75	98.667	1818796	1818869	1029507	1029581	7.91e-28
chr1	chr1	F	77	97.403	2008443	2008519	1218523	1218599	7.91e-28
chr1	chr1	F	264	78.03	414651	414888	12192	12442	2.85e-27
chr1	chr1	P	266	75.94	2024070	2024329	45356	45619	2.85e-27
chr1	chr1	P	377	73.475	1542312	1542682	89315	89683	2.85e-27
chr1	chr1	P	379	73.615	1760651	1761027	177640	178003	2.85e-27
chr1	chr1	F	210	78.571	1864351	1864558	490257	490459	2.85e-27
chr1	chr1	F	391	73.657	873761	874132	490330	490715	2.85e-27
chr1	chr1	P	135	84.444	1172518	1172648	888315	888449	2.85e-27
chr1	chr1	P	275	75.636	45356	45628	2024061	2024329	2.85e-27
chr1	chr1	F	73	98.63	1626395	1626467	38405	38476	1.02e-26
chr1	chr1	F	69	100	2119035	2119103	497686	497754	1.02e-26
chr1	chr1	P	177	80.226	2074331	2074506	729851	730022	1.02e-26
chr1	chr1	F	101	90.099	1352791	1352888	803992	804092	1.02e-26
chr1	chr1	F	101	90.099	1699226	1699326	1352791	1352888	1.02e-26
chr1	chr1	F	196	79.082	2074327	2074521	1557963	1558152	1.02e-26
chr1	chr1	P	158	81.646	729869	730022	2074331	2074488	1.02e-26
chr1	chr1	P	71	98.592	497683	497753	213896	213966	3.68e-26
chr1	chr1	F	77	96.104	2115422	2115498	497680	497756	3.68e-26
chr1	chr1	P	68	100	2089114	2089181	497686	497753	3.68e-26
chr1	chr1	P	74	97.297	1750774	1750847	1629049	1629122	3.68e-26
chr1	chr1	P	74	97.297	497686	497759	2089108	2089181	3.68e-26
chr1	chr1	P	70	98.571	2119036	2119105	213893	213962	1.32e-25
chr1	chr1	F	67	100	2089114	2089180	213896	213962	1.32e-25
chr1	chr1	P	80	95	883289	883367	274151	274230	1.32e-25
chr1	chr1	P	79	94.937	457567	457645	388663	388741	1.32e-25
chr1	chr1	P	76	96.053	388666	388741	457567	457642	1.32e-25
chr1	chr1	F	171	81.871	1724540	1724693	806347	806512	1.32e-25
chr1	chr1	F	82	93.902	1547166	1547247	847032	847113	1.32e-25
chr1	chr1	F	67	100	1544045	1544111	1073024	1073090	1.32e-25
chr1	chr1	F	67	100	1667273	1667339	1358921	1358987	1.32e-25
chr1	chr1	F	171	81.871	1724540	1724693	1701581	1701746	1.32e-25
chr1	chr1	P	67	100	213896	213962	2119036	2119102	1.32e-25
chr1	chr1	F	66	100	1372330	1372395	277937	278002	4.76e-25
chr1	chr1	P	149	81.879	1557983	1558129	729860	730006	4.76e-25
chr1	chr1	P	106	88.679	1524771	1524872	1427687	1427789	4.76e-25
chr1	chr1	F	163	80.368	2070587	2070748	82645	82804	1.71e-24
chr1	chr1	F	151	82.119	1037287	1037429	120165	120314	1.71e-24
chr1	chr1	F	68	98.529	2025362	2025429	213894	213961	1.71e-24
chr1	chr1	F	65	100	708486	708550	278742	278806	1.71e-24
chr1	chr1	F	65	100	1376498	1376562	278742	278806	1.71e-24
chr1	chr1	P	65	100	2025365	2025429	497688	497752	1.71e-24
chr1	chr1	F	91	91.209	1197736	1197823	567679	567769	1.71e-24
chr1	chr1	F	109	87.156	1596519	1596624	570708	570816	1.71e-24
chr1	chr1	P	65	100	1372266	1372330	843557	843621	1.71e-24
chr1	chr1	P	105	87.619	1334996	1335099	918555	918659	1.71e-24
chr1	chr1	F	87	91.954	1800820	1800905	1213324	1213409	1.71e-24
chr1	chr1	P	90	91.111	918570	918659	1334996	1335084	1.71e-24
chr1	chr1	P	65	100	1623166	1623230	1379661	1379725	1.71e-24
chr1	chr1	P	79	94.937	1855145	1855219	1834806	1834884	1.71e-24
chr1	chr1	P	65	100	2119037	2119101	2025365	2025429	1.71e-24
chr1	chr1	F	65	100	2089115	2089179	2025365	2025429	1.71e-24
chr1	chr1	P	144	83.333	2081342	2081485	38830	38958	6.16e-24
chr1	chr1	F	75	96	161117	161191	74083	74154	6.16e-24
chr1	chr1	P	67	98.507	2115429	2115495	213896	213962	6.16e-24
chr1	chr1	F	137	82.482	2028348	2028483	225863	225998	6.16e-24
chr1	chr1	F	71	97.183	485245	485313	308912	308982	6.16e-24
chr1	chr1	F	74	95.946	850169	850242	842599	842671	6.16e-24
chr1	chr1	F	74	95.946	1628102	1628175	842599	842671	6.16e-24
chr1	chr1	P	144	81.944	2128710	2128853	1422212	1422352	6.16e-24
chr1	chr1	P	64	100	213899	213962	2115429	2115492	6.16e-24
chr1	chr1	P	147	81.633	1422212	1422355	2128707	2128853	6.16e-24
chr1	chr1	F	118	85.593	998934	999045	31257	31372	2.22e-23
chr1	chr1	F	69	97.101	843554	843622	488578	488646	2.22e-23
chr1	chr1	F	83	92.771	2033431	2033510	715167	715249	2.22e-23
chr1	chr1	P	63	100	1648495	1648557	1037711	1037773	2.22e-23
chr1	chr1	F	94	89.362	1681580	1681673	1083989	1084080	2.22e-23
chr1	chr1	P	123	85.366	1197224	1197339	1161589	1161707	2.22e-23
chr1	chr1	P	126	84.921	1161589	1161710	1197221	1197339	2.22e-23
chr1	chr1	P	86	91.86	1270754	1270839	1197736	1197818	2.22e-23
chr1	chr1	P	63	100	2115430	2115492	2025367	2025429	2.22e-23
chr1	chr1	P	226	76.549	2072974	2073192	22707	22929	7.97e-23
chr1	chr1	P	77	93.506	1582943	1583019	50237	50313	7.97e-23
chr1	chr1	F	164	81.098	943341	943502	117748	117896	7.97e-23
chr1	chr1	F	72	95.833	1756936	1757007	309847	309917	7.97e-23
chr1	chr1	P	65	98.462	1372266	1372330	488581	488645	7.97e-23
chr1	chr1	F	78	93.59	2042905	2042981	508656	508733	7.97e-23
chr1	chr1	P	71	95.775	870579	870649	836569	836639	7.97e-23
chr1	chr1	P	116	84.483	1542642	1542757	1037061	1037176	7.97e-23
chr1	chr1	P	93	89.247	2038469	2038560	1162800	1162892	7.97e-23
chr1	chr1	P	68	97.059	488581	488648	1372263	1372330	7.97e-23
chr1	chr1	F	71	95.775	1751243	1751313	1425484	1425554	7.97e-23
chr1	chr1	P	119	84.034	1037061	1037179	1542639	1542757	7.97e-23
chr1	chr1	F	87	90.805	1831814	1831900	1818329	1818413	7.97e-23
chr1	chr1	P	275	74.909	22707	22978	2072927	2073192	7.97e-23
chr1	chr1	F	67	97.015	488579	488645	17002	17068	2.87e-22
chr1	chr1	F	61	100	2025371	2025431	38728	38788	2.87e-22
chr1	chr1	P	90	90	1978052	1978141	38830	38915	2.87e-22
chr1	chr1	P	71	95.775	1756937	1757007	224232	224301	2.87e-22
chr1	chr1	P	87	90.805	1156970	1157056	225722	225805	2.87e-22
chr1	chr1	F	72	95.833	273072	273143	271452	271520	2.87e-22
chr1	chr1	F	64	98.438	761279	761342	349500	349563	2.87e-22
chr1	chr1	F	90	90	1978052	1978141	480239	480324	2.87e-22
chr1	chr1	F	84	91.667	1612898	1612981	707570	707650	2.87e-22
chr1	chr1	F	162	79.63	2076902	2077063	739668	739825	2.87e-22
chr1	chr1	F	72	95.833	1626384	1626452	1433511	1433582	2.87e-22
chr1	chr1	F	61	100	2025371	2025431	1623064	1623124	2.87e-22
chr1	chr1	F	76	93.421	2081422	2081497	1978078	1978153	2.87e-22
chr1	chr1	F	163	79.755	462989	463149	33646	33803	1.03e-21
chr1	chr1	F	165	80.606	1658629	1658792	186523	186671	1.03e-21
chr1	chr1	F	80	92.5	1482052	1482131	206707	206782	1.03e-21
chr1	chr1	F	80	92.5	2106716	2106795	206707	206782	1.03e-21
chr1	chr1	P	67	97.015	2106729	2106795	276953	277017	1.03e-21
chr1	chr1	P	67	97.015	1482065	1482131	276953	277017	1.03e-21
chr1	chr1	P	60	100	1340668	1340727	515281	515340	1.03e-21
chr1	chr1	F	78	92.308	1755310	1755387	564912	564989	1.03e-21
chr1	chr1	F	118	83.898	1516045	1516162	1095954	1096070	1.03e-21
chr1	chr1	P	80	92.5	276953	277028	1482052	1482131	1.03e-21
chr1	chr1	P	80	92.5	276953	277028	2106716	2106795	1.03e-21
chr1	chr1	F	71	94.366	1425484	1425554	34090	34160	3.71e-21
chr1	chr1	P	95	88.421	1628127	1628221	38682	38771	3.71e-21
chr1	chr1	P	59	100	2119037	2119095	38728	38786	3.71e-21
chr1	chr1	P	59	100	2115430	2115488	38728	38786	3.71e-21
chr1	chr1	F	59	100	213903	213961	38728	38786	3.71e-21
chr1	chr1	P	59	100	497688	497746	38728	38786	3.71e-21
chr1	chr1	F	59	100	2089121	2089179	38728	38786	3.71e-21
chr1	chr1	P	69	95.652	842599	842666	38810	38878	3.71e-21
chr1	chr1	P	62	98.387	2079044	2079105	60765	60826	3.71e-21
chr1	chr1	F	65	96.923	89999	90063	85571	85635	3.71e-21
chr1	chr1	P	98	86.735	186655	186752	128164	128261	3.71e-21
chr1	chr1	P	95	87.368	128167	128261	186655	186749	3.71e-21
chr1	chr1	P	71	94.366	1425484	1425554	195089	195159	3.71e-21
chr1	chr1	P	93	89.247	850159	850245	206779	206869	3.71e-21
chr1	chr1	F	59	100	1623064	1623122	213903	213961	3.71e-21
chr1	chr1	P	59	100	391693	391751	243427	243485	3.71e-21
chr1	chr1	P	191	77.487	1386437	1386621	267842	268032	3.71e-21
chr1	chr1	F	93	89.247	850159	850245	276866	276956	3.71e-21
chr1	chr1	F	69	95.652	842599	842666	480276	480344	3.71e-21
chr1	chr1	F	69	95.652	842599	842666	485370	485438	3.71e-21
chr1	chr1	P	59	100	1623064	1623122	497688	497746	3.71e-21
chr1	chr1	P	69	95.652	1623146	1623214	842599	842666	3.71e-21
chr1	chr1	F	69	95.652	1433302	1433370	842599	842666	3.71e-21
chr1	chr1	F	59	100	963198	963256	872547	872605	3.71e-21
chr1	chr1	P	62	98.387	1498799	1498860	1183769	1183830	3.71e-21
chr1	chr1	F	62	98.387	1261820	1261881	1258693	1258754	3.71e-21
chr1	chr1	F	59	100	1355138	1355196	1349106	1349164	3.71e-21
chr1	chr1	P	188	77.66	267845	268032	1386437	1386618	3.71e-21
chr1	chr1	P	59	100	1183772	1183830	1498799	1498857	3.71e-21
chr1	chr1	P	95	88.421	1628127	1628221	1623018	1623107	3.71e-21
chr1	chr1	P	59	100	2119037	2119095	1623064	1623122	3.71e-21
chr1	chr1	P	59	100	2115430	2115488	1623064	1623122	3.71e-21
chr1	chr1	F	59	100	2089121	2089179	1623064	1623122	3.71e-21
chr1	chr1	P	76	93.421	1978066	1978141	1623166	1623237	3.71e-21
chr1	chr1	F	64	96.875	1433519	1433582	38399	38462	1.33e-20
chr1	chr1	P	96	87.5	540182	540274	78092	78186	1.33e-20
chr1	chr1	F	74	93.243	722054	722126	98716	98789	1.33e-20
chr1	chr1	P	120	84.167	1386665	1386784	267732	267841	1.33e-20
chr1	chr1	F	61	98.361	1791754	1791814	277218	277278	1.33e-20
chr1	chr1	F	67	95.522	1308595	1308661	462111	462177	1.33e-20
chr1	chr1	F	72	94.444	1434990	1435057	515390	515461	1.33e-20
chr1	chr1	F	72	94.444	1831904	1831971	515390	515461	1.33e-20
chr1	chr1	F	720	70	2073982	2074689	739317	740020	1.33e-20
chr1	chr1	F	111	85.586	2034126	2034228	803945	804053	1.33e-20
chr1	chr1	F	95	87.368	1424980	1425073	1047184	1047278	1.33e-20
chr1	chr1	P	61	98.361	1825063	1825123	1420249	1420309	1.33e-20
chr1	chr1	P	83	90.361	1859616	1859698	1655599	1655679	1.33e-20
chr1	chr1	F	111	85.586	2034126	2034228	1699179	1699287	1.33e-20
chr1	chr1	P	63	96.825	264945	265007	9768	9830	4.80e-20
chr1	chr1	F	76	92.105	843547	843621	16994	17068	4.80e-20
chr1	chr1	P	366	72.678	869578	869934	27981	28337	4.80e-20
chr1	chr1	F	63	96.825	161759	161821	107201	107263	4.80e-20
chr1	chr1	F	161	80.124	514743	514888	452392	452552	4.80e-20
chr1	chr1	P	70	94.286	1603258	1603327	1045182	1045249	4.80e-20
chr1	chr1	F	167	79.042	1606566	1606728	1606421	1606581	4.80e-20
chr1	chr1	F	66	95.455	2050878	2050943	1685720	1685785	4.80e-20
chr1	chr1	F	67	95.522	1905934	1906000	1767693	1767757	4.80e-20
chr1	chr1	F	94	87.234	1377307	1377397	78092	78184	1.73e-19
chr1	chr1	F	123	82.927	1066433	1066551	186709	186828	1.73e-19
chr1	chr1	F	84	89.286	471172	471255	220557	220638	1.73e-19
chr1	chr1	P	78	91.026	1628101	1628177	452644	452720	1.73e-19
chr1	chr1	P	78	91.026	850168	850244	452644	452720	1.73e-19
chr1	chr1	F	265	74.34	1557996	1558255	531998	532257	1.73e-19
chr1	chr1	P	60	98.333	1012146	1012204	881603	881662	1.73e-19
chr1	chr1	P	238	77.311	1313281	1313507	916823	917032	1.73e-19
chr1	chr1	F	62	96.774	1986552	1986613	1074085	1074146	1.73e-19
chr1	chr1	P	70	94.286	1668541	1668606	1359910	1359979	1.73e-19
chr1	chr1	F	70	94.286	2115429	2115495	1378309	1378378	1.73e-19
chr1	chr1	F	79	91.139	1978073	1978151	1379661	1379735	1.73e-19
chr1	chr1	F	59	98.305	1827413	1827471	1621931	1621989	1.73e-19
chr1	chr1	P	116	84.483	2081491	2081594	1622955	1623070	1.73e-19
chr1	chr1	F	150	80	1930828	1930976	1930765	1930908	1.73e-19
chr1	chr1	P	154	81.169	1622955	1623107	2081462	2081594	1.73e-19
chr1	chr1	P	115	84.348	2081491	2081594	38620	38734	6.21e-19
chr1	chr1	F	55	100	38799	38853	38717	38771	6.21e-19
chr1	chr1	F	55	100	1623135	1623189	38717	38771	6.21e-19
chr1	chr1	F	55	100	1623053	1623107	38799	38853	6.21e-19
chr1	chr1	F	136	81.618	1204793	1204924	80891	81018	6.21e-19
chr1	chr1	P	55	100	1462409	1462463	131370	131424	6.21e-19
chr1	chr1	P	79	91.139	1628100	1628175	206783	206859	6.21e-19
chr1	chr1	P	81	90.123	1378307	1378387	213887	213964	6.21e-19
chr1	chr1	F	170	78.235	280078	280245	222541	222704	6.21e-19
chr1	chr1	F	82	90.244	1628097	1628175	276873	276952	6.21e-19
chr1	chr1	P	55	100	1590551	1590605	280936	280990	6.21e-19
chr1	chr1	F	58	98.276	874106	874163	366593	366650	6.21e-19
chr1	chr1	P	62	96.774	497700	497759	452636	452697	6.21e-19
chr1	chr1	P	55	100	2119049	2119103	452643	452697	6.21e-19
chr1	chr1	P	58	98.276	1622959	1623016	485458	485515	6.21e-19
chr1	chr1	P	55	100	452643	452697	497700	497754	6.21e-19
chr1	chr1	F	172	77.907	2074360	2074530	531998	532164	6.21e-19
chr1	chr1	F	64	95.312	1879929	1879992	952451	952514	6.21e-19
chr1	chr1	P	69	94.203	213899	213964	1378307	1378375	6.21e-19
chr1	chr1	F	55	100	1623135	1623189	1623053	1623107	6.21e-19
chr1	chr1	P	82	90.244	206783	206862	1628097	1628175	6.21e-19
chr1	chr1	P	153	81.046	38620	38771	2081462	2081594	6.21e-19
chr1	chr1	P	111	84.685	1369861	1369967	38372	38475	2.23e-18
chr1	chr1	P	60	96.667	485458	485517	38621	38680	2.23e-18
chr1	chr1	P	69	92.754	851074	851142	174491	174559	2.23e-18
chr1	chr1	F	54	100	452644	452697	213896	213949	2.23e-18
chr1	chr1	F	66	93.939	1502182	1502247	224240	224305	2.23e-18
chr1	chr1	F	58	98.276	2089111	2089167	452640	452697	2.23e-18
chr1	chr1	P	57	98.246	38624	38680	485458	485514	2.23e-18
chr1	chr1	F	256	73.828	1373202	1373456	785125	785379	2.23e-18
chr1	chr1	P	63	95.238	174497	174559	851074	851136	2.23e-18
chr1	chr1	F	64	95.312	1166033	1166096	926867	926929	2.23e-18
chr1	chr1	P	71	92.958	2025367	2025433	1378305	1378375	2.23e-18
chr1	chr1	P	65	93.846	1379661	1379725	38830	38894	8.03e-18
chr1	chr1	P	53	100	1628127	1628179	213894	213946	8.03e-18
chr1	chr1	F	53	100	2025365	2025417	452645	452697	8.03e-18
chr1	chr1	F	53	100	467037	467089	466977	467029	8.03e-18
chr1	chr1	F	65	93.846	1379661	1379725	480260	480324	8.03e-18
chr1	chr1	F	62	95.161	1379664	1379725	485357	485418	8.03e-18
chr1	chr1	F	67	94.03	1378309	1378375	497687	497750	8.03e-18
chr1	chr1	P	174	77.011	739665	739837	729851	730023	8.03e-18
chr1	chr1	F	60	96.667	1378321	1378379	850186	850245	8.03e-18
chr1	chr1	P	67	94.03	2089117	2089180	1378309	1378375	8.03e-18
chr1	chr1	F	67	94.03	2119036	2119099	1378309	1378375	8.03e-18
chr1	chr1	F	65	93.846	1628086	1628150	1379661	1379725	8.03e-18
chr1	chr1	F	60	96.667	1875282	1875341	1510249	1510307	8.03e-18
chr1	chr1	F	76	90.789	1978066	1978141	1628079	1628150	8.03e-18
chr1	chr1	P	70	92.857	1378309	1378378	2089114	2089180	8.03e-18
chr1	chr1	F	52	100	206808	206859	38829	38880	2.89e-17
chr1	chr1	P	52	100	276876	276927	38829	38880	2.89e-17
chr1	chr1	F	55	98.182	858358	858412	187543	187597	2.89e-17
chr1	chr1	P	52	100	1433300	1433351	206808	206859	2.89e-17
chr1	chr1	F	52	100	1623165	1623216	206808	206859	2.89e-17
chr1	chr1	P	52	100	485368	485419	206808	206859	2.89e-17
chr1	chr1	P	52	100	480274	480325	206808	206859	2.89e-17
chr1	chr1	F	55	98.182	480271	480325	276873	276927	2.89e-17
chr1	chr1	F	55	98.182	485365	485419	276873	276927	2.89e-17
chr1	chr1	F	55	98.182	1433297	1433351	276873	276927	2.89e-17
chr1	chr1	P	55	98.182	38829	38883	276873	276927	2.89e-17
chr1	chr1	P	52	100	1623165	1623216	276876	276927	2.89e-17
chr1	chr1	F	71	91.549	2024634	2024704	279991	280059	2.89e-17
chr1	chr1	F	76	90.789	911338	911409	284203	284277	2.89e-17
chr1	chr1	P	85	87.059	1134707	1134791	397783	397867	2.89e-17
chr1	chr1	P	55	98.182	2115442	2115496	452643	452697	2.89e-17
chr1	chr1	P	55	98.182	206808	206862	480271	480325	2.89e-17
chr1	chr1	P	55	98.182	206808	206862	485365	485419	2.89e-17
chr1	chr1	P	125	81.6	884007	884130	508436	508554	2.89e-17
chr1	chr1	P	55	98.182	734317	734371	560283	560337	2.89e-17
chr1	chr1	P	59	96.61	1634483	1634541	676270	676327	2.89e-17
chr1	chr1	F	64	93.75	1628175	1628238	732478	732541	2.89e-17
chr1	chr1	P	58	96.552	560283	560340	734314	734371	2.89e-17
chr1	chr1	P	142	80.282	2034282	2034415	917149	917287	2.89e-17
chr1	chr1	F	52	100	1467563	1467614	1073784	1073835	2.89e-17
chr1	chr1	P	91	85.714	1276118	1276208	1145450	1145540	2.89e-17
chr1	chr1	P	58	96.552	1581894	1581951	1271005	1271062	2.89e-17
chr1	chr1	F	56	98.214	1628119	1628174	1378321	1378375	2.89e-17
chr1	chr1	F	61	95.082	1433290	1433350	1379665	1379725	2.89e-17
chr1	chr1	P	55	98.182	206808	206862	1433297	1433351	2.89e-17
chr1	chr1	F	65	93.846	2099062	2099124	1465335	1465399	2.89e-17
chr1	chr1	P	58	96.552	1620908	1620965	1561076	1561133	2.89e-17
chr1	chr1	F	103	83.495	2076585	2076687	2074016	2074118	2.89e-17
chr1	chr1	P	61	95.082	1379675	1379735	17011	17070	1.04e-16
chr1	chr1	F	57	96.491	886301	886357	97318	97374	1.04e-16
chr1	chr1	P	51	100	1379675	1379725	206809	206859	1.04e-16
chr1	chr1	P	51	100	850194	850244	213896	213946	1.04e-16
chr1	chr1	F	51	100	1379675	1379725	276876	276926	1.04e-16
chr1	chr1	F	57	96.491	1791799	1791855	277882	277938	1.04e-16
chr1	chr1	F	51	100	850194	850244	497703	497753	1.04e-16
chr1	chr1	F	51	100	1628127	1628177	497703	497753	1.04e-16
chr1	chr1	F	78	89.744	1941354	1941426	568220	568297	1.04e-16
chr1	chr1	F	126	80.159	2133004	2133129	758429	758554	1.04e-16
chr1	chr1	F	66	92.424	1735677	1735742	775135	775200	1.04e-16
chr1	chr1	P	75	90.667	1570991	1571062	812847	812919	1.04e-16
chr1	chr1	P	66	92.424	1130790	1130855	819419	819484	1.04e-16
chr1	chr1	P	60	95	1191621	1191680	845887	845946	1.04e-16
chr1	chr1	F	51	100	1379675	1379725	850167	850217	1.04e-16
chr1	chr1	P	51	100	2089114	2089164	850194	850244	1.04e-16
chr1	chr1	F	51	100	2119052	2119102	850194	850244	1.04e-16
chr1	chr1	P	57	96.491	886301	886357	878633	878689	1.04e-16
chr1	chr1	P	178	76.404	1331262	1331438	1246826	1247002	1.04e-16
chr1	chr1	F	72	91.667	1978087	1978158	1372264	1372330	1.04e-16
chr1	chr1	P	64	93.75	1756936	1756999	1502182	1502244	1.04e-16
chr1	chr1	P	75	90.667	1708081	1708153	1570991	1571062	1.04e-16
chr1	chr1	P	54	98.148	2025361	2025414	1628127	1628180	1.04e-16
chr1	chr1	P	51	100	2089114	2089164	1628127	1628177	1.04e-16
chr1	chr1	F	51	100	2119052	2119102	1628127	1628177	1.04e-16
chr1	chr1	F	50	100	1471425	1471474	37379	37428	3.73e-16
chr1	chr1	F	105	82.857	1979939	1980042	66597	66700	3.73e-16
chr1	chr1	P	50	100	1902862	1902911	125316	125365	3.73e-16
chr1	chr1	P	53	98.113	264951	265003	131370	131422	3.73e-16
chr1	chr1	F	53	98.113	1462411	1462463	264951	265003	3.73e-16
chr1	chr1	P	103	83.495	1229501	1229601	286870	286970	3.73e-16
chr1	chr1	F	59	94.915	1569855	1569913	357683	357741	3.73e-16
chr1	chr1	F	64	93.75	1213431	1213491	488582	488644	3.73e-16
chr1	chr1	F	59	94.915	2086140	2086198	513382	513440	3.73e-16
chr1	chr1	F	220	76.364	1941539	1941757	568290	568483	3.73e-16
chr1	chr1	F	56	96.429	1814747	1814802	722079	722134	3.73e-16
chr1	chr1	P	77	88.312	1001248	1001324	730820	730896	3.73e-16
chr1	chr1	P	50	100	2025365	2025414	850194	850243	3.73e-16
chr1	chr1	P	56	96.429	1746561	1746616	965818	965873	3.73e-16
chr1	chr1	P	77	88.312	730829	730905	1001239	1001315	3.73e-16
chr1	chr1	P	109	82.569	286870	286976	1229495	1229601	3.73e-16
chr1	chr1	F	141	80.851	2081422	2081548	1628091	1628226	3.73e-16
chr1	chr1	P	66	92.424	1704310	1704372	32934	32999	1.34e-15
chr1	chr1	P	66	92.424	809076	809138	32934	32999	1.34e-15
chr1	chr1	F	71	90.141	452651	452720	38810	38879	1.34e-15
chr1	chr1	P	49	100	842623	842671	213898	213946	1.34e-15
chr1	chr1	F	49	100	1496038	1496086	280010	280058	1.34e-15
chr1	chr1	F	59	94.915	1256421	1256478	290744	290802	1.34e-15
chr1	chr1	P	74	89.189	842599	842671	452646	452719	1.34e-15
chr1	chr1	P	71	90.141	1433301	1433370	452651	452720	1.34e-15
chr1	chr1	F	71	90.141	1623146	1623215	452651	452720	1.34e-15
chr1	chr1	P	71	90.141	485369	485438	452651	452720	1.34e-15
chr1	chr1	P	71	90.141	480275	480344	452651	452720	1.34e-15
chr1	chr1	P	59	94.915	1379677	1379735	488588	488645	1.34e-15
chr1	chr1	F	49	100	842623	842671	497703	497751	1.34e-15
chr1	chr1	F	59	94.915	1733499	1733556	513530	513588	1.34e-15
chr1	chr1	P	76	89.474	887307	887382	575523	575593	1.34e-15
chr1	chr1	P	70	90	1551828	1551897	580347	580416	1.34e-15
chr1	chr1	P	52	98.077	1782554	1782605	591494	591545	1.34e-15
chr1	chr1	P	133	79.699	2076935	2077066	729860	729987	1.34e-15
chr1	chr1	P	104	83.654	1205601	1205700	803054	803153	1.34e-15
chr1	chr1	F	55	96.364	1378321	1378375	842616	842670	1.34e-15
chr1	chr1	P	49	100	2089116	2089164	842623	842671	1.34e-15
chr1	chr1	P	49	100	2025366	2025414	842623	842671	1.34e-15
chr1	chr1	F	49	100	2119052	2119100	842623	842671	1.34e-15
chr1	chr1	P	70	91.429	1978089	1978158	843557	843621	1.34e-15
chr1	chr1	F	69	91.304	1213431	1213496	843558	843625	1.34e-15
chr1	chr1	F	70	91.429	1784536	1784600	918381	918450	1.34e-15
chr1	chr1	P	316	72.785	2067129	2067430	1037073	1037384	1.34e-15
chr1	chr1	F	91	85.714	1775847	1775937	1059900	1059984	1.34e-15
chr1	chr1	P	104	83.654	1698288	1698387	1205601	1205700	1.34e-15
chr1	chr1	F	82	87.805	1533720	1533801	1402832	1402908	1.34e-15
chr1	chr1	F	49	100	2024655	2024703	1496038	1496086	1.34e-15
chr1	chr1	F	59	94.915	1735729	1735786	1543936	1543994	1.34e-15
chr1	chr1	F	479	70.772	2076935	2077405	1558002	1558468	1.34e-15
chr1	chr1	P	62	93.548	2025301	2025360	1581018	1581079	1.34e-15
chr1	chr1	F	85	87.059	2081350	2081432	1627999	1628080	1.34e-15
chr1	chr1	P	55	96.364	591494	591548	1782551	1782605	1.34e-15
chr1	chr1	P	68	91.176	1581018	1581085	2025295	2025360	1.34e-15
chr1	chr1	F	56	96.429	2032896	2032949	2031091	2031146	1.34e-15
chr1	chr1	P	320	72.812	1037073	1037387	2067126	2067430	1.34e-15
chr1	chr1	P	148	78.378	729863	730005	2076917	2077063	1.34e-15
chr1	chr1	P	57	94.737	1378902	1378958	16293	16349	4.83e-15
chr1	chr1	F	97	85.567	223999	224092	24086	24172	4.83e-15
chr1	chr1	P	62	93.548	1378310	1378371	38728	38786	4.83e-15
chr1	chr1	P	52	98.077	1378321	1378371	38810	38861	4.83e-15
chr1	chr1	F	54	96.296	919094	919147	97435	97488	4.83e-15
chr1	chr1	F	430	71.163	712682	713101	177812	178231	4.83e-15
chr1	chr1	P	48	100	1495249	1495296	187391	187438	4.83e-15
chr1	chr1	F	54	96.296	1922624	1922677	194079	194132	4.83e-15
chr1	chr1	F	48	100	1379617	1379664	214030	214077	4.83e-15
chr1	chr1	F	48	100	710592	710639	224627	224674	4.83e-15
chr1	chr1	F	58	94.828	1792696	1792752	249229	249286	4.83e-15
chr1	chr1	F	58	94.828	412650	412706	259242	259299	4.83e-15
chr1	chr1	F	60	93.333	1626385	1626444	332083	332142	4.83e-15
chr1	chr1	P	51	98.039	1378328	1378378	452644	452694	4.83e-15
chr1	chr1	F	52	98.077	1378321	1378371	480293	480344	4.83e-15
chr1	chr1	F	52	98.077	1378321	1378371	485387	485438	4.83e-15
chr1	chr1	P	72	90.278	1978089	1978160	488579	488645	4.83e-15
chr1	chr1	P	54	96.296	1072681	1072734	612549	612602	4.83e-15
chr1	chr1	P	48	100	944209	944256	736575	736622	4.83e-15
chr1	chr1	F	48	100	2115445	2115492	842623	842670	4.83e-15
chr1	chr1	F	48	100	2115445	2115492	850194	850241	4.83e-15
chr1	chr1	P	48	100	1626328	1626375	944209	944256	4.83e-15
chr1	chr1	F	99	83.838	1906003	1906095	1034213	1034311	4.83e-15
chr1	chr1	P	48	100	612555	612602	1072681	1072728	4.83e-15
chr1	chr1	P	90	85.556	1306311	1306394	1166751	1166840	4.83e-15
chr1	chr1	F	61	93.443	1379675	1379735	1372264	1372323	4.83e-15
chr1	chr1	P	62	93.548	1623064	1623122	1378310	1378371	4.83e-15
chr1	chr1	P	52	98.077	1623146	1623197	1378321	1378371	4.83e-15
chr1	chr1	F	52	98.077	1433319	1433370	1378321	1378371	4.83e-15
chr1	chr1	P	48	100	452647	452694	1378328	1378375	4.83e-15
chr1	chr1	F	48	100	2115445	2115492	1628127	1628174	4.83e-15
chr1	chr1	P	60	93.333	1462405	1462463	9772	9831	1.74e-14
chr1	chr1	F	53	96.226	131370	131422	9772	9824	1.74e-14
chr1	chr1	F	59	93.22	38654	38712	9803	9861	1.74e-14
chr1	chr1	F	59	93.22	1622990	1623048	9803	9861	1.74e-14
chr1	chr1	P	57	94.737	850161	850217	17021	17075	1.74e-14
chr1	chr1	F	47	100	452651	452697	38728	38774	1.74e-14
chr1	chr1	F	47	100	758208	758254	38838	38884	1.74e-14
chr1	chr1	F	53	96.226	514165	514217	60399	60451	1.74e-14
chr1	chr1	P	50	98	696433	696482	227741	227790	1.74e-14
chr1	chr1	F	130	80	1839763	1839890	286844	286966	1.74e-14
chr1	chr1	F	47	100	1623064	1623110	452651	452697	1.74e-14
chr1	chr1	P	47	100	758208	758254	480270	480316	1.74e-14
chr1	chr1	P	47	100	758208	758254	485364	485410	1.74e-14
chr1	chr1	P	53	96.226	881934	881986	543044	543096	1.74e-14
chr1	chr1	P	50	98	1000249	1000298	578275	578324	1.74e-14
chr1	chr1	P	47	100	1628096	1628142	758208	758254	1.74e-14
chr1	chr1	P	47	100	1433296	1433342	758208	758254	1.74e-14
chr1	chr1	F	57	94.737	1372259	1372313	850161	850217	1.74e-14
chr1	chr1	F	50	98	1527995	1528044	922344	922393	1.74e-14
chr1	chr1	P	64	92.188	1372267	1372329	1213431	1213491	1.74e-14
chr1	chr1	P	53	96.226	1838334	1838386	1319596	1319648	1.74e-14
chr1	chr1	P	57	94.737	9775	9831	1462405	1462460	1.74e-14
chr1	chr1	P	56	94.643	1319596	1319651	1838331	1838386	1.74e-14
chr1	chr1	F	46	100	955089	955134	21089	21134	6.25e-14
chr1	chr1	F	95	83.158	1988548	1988640	107538	107632	6.25e-14
chr1	chr1	F	80	86.25	1988698	1988776	107658	107737	6.25e-14
chr1	chr1	F	133	80.451	1538916	1539046	153163	153279	6.25e-14
chr1	chr1	F	55	94.545	1538595	1538649	159706	159760	6.25e-14
chr1	chr1	F	46	100	1362940	1362985	290946	290991	6.25e-14
chr1	chr1	F	99	82.828	1972387	1972485	404849	404944	6.25e-14
chr1	chr1	P	55	94.545	1403247	1403301	445907	445961	6.25e-14
chr1	chr1	F	53	96.226	1634575	1634625	485176	485228	6.25e-14
chr1	chr1	F	128	80.469	1774455	1774574	535772	535893	6.25e-14
chr1	chr1	P	80	87.5	843557	843630	575515	575593	6.25e-14
chr1	chr1	P	121	80.992	1579701	1579821	795796	795904	6.25e-14
chr1	chr1	F	70	90	2045741	2045806	819123	819191	6.25e-14
chr1	chr1	P	74	89.189	575521	575593	843557	843624	6.25e-14
chr1	chr1	P	59	93.22	1379677	1379735	843564	843621	6.25e-14
chr1	chr1	P	49	97.959	1884908	1884956	850270	850318	6.25e-14
chr1	chr1	F	229	74.236	2059759	2059976	1037061	1037288	6.25e-14
chr1	chr1	F	46	100	1362221	1362266	1134933	1134978	6.25e-14
chr1	chr1	P	242	73.554	2070540	2070776	1280209	1280447	6.25e-14
chr1	chr1	F	49	97.959	1751760	1751808	1372155	1372203	6.25e-14
chr1	chr1	F	75	88	2081421	2081495	1379665	1379735	6.25e-14
chr1	chr1	P	121	80.992	1691030	1691138	1579701	1579821	6.25e-14
chr1	chr1	F	55	94.545	1925015	1925069	1924961	1925015	6.25e-14
chr1	chr1	P	239	73.64	1280212	1280447	2070540	2070773	6.25e-14
chr1	chr1	P	81	86.42	1978087	1978166	16995	17070	2.25e-13
chr1	chr1	F	52	96.154	38830	38881	17021	17071	2.25e-13
chr1	chr1	P	52	96.154	1628099	1628150	17021	17071	2.25e-13
chr1	chr1	P	52	96.154	1433299	1433350	17021	17071	2.25e-13
chr1	chr1	P	52	96.154	485367	485418	17021	17071	2.25e-13
chr1	chr1	P	52	96.154	480273	480324	17021	17071	2.25e-13
chr1	chr1	P	52	96.154	1372263	1372313	38830	38881	2.25e-13
chr1	chr1	F	48	97.917	1814747	1814794	98742	98789	2.25e-13
chr1	chr1	F	230	74.348	969434	969662	179751	179965	2.25e-13
chr1	chr1	F	45	100	1634678	1634722	268750	268794	2.25e-13
chr1	chr1	P	57	92.982	638725	638781	450839	450895	2.25e-13
chr1	chr1	F	137	78.102	1558414	1558547	451766	451901	2.25e-13
chr1	chr1	F	52	96.154	1372263	1372313	480273	480324	2.25e-13
chr1	chr1	F	52	96.154	1372263	1372313	485367	485418	2.25e-13
chr1	chr1	F	72	88.889	1476129	1476195	523523	523594	2.25e-13
chr1	chr1	F	61	91.803	1575665	1575723	863597	863657	2.25e-13
chr1	chr1	F	428	70.794	2059175	2059598	1036480	1036895	2.25e-13
chr1	chr1	F	48	97.917	1078158	1078205	1078128	1078175	2.25e-13
chr1	chr1	P	54	94.444	1817134	1817187	1114928	1114981	2.25e-13
chr1	chr1	F	55	94.545	1855293	1855347	1218618	1218670	2.25e-13
chr1	chr1	F	52	96.154	1433299	1433350	1372263	1372313	2.25e-13
chr1	chr1	F	52	96.154	1628099	1628150	1372263	1372313	2.25e-13
chr1	chr1	F	63	90.476	1439613	1439675	1439419	1439481	2.25e-13
chr1	chr1	P	71	88.732	1767275	1767341	1543825	1543895	2.25e-13
chr1	chr1	F	64	90.625	1213431	1213491	17005	17067	8.08e-13
chr1	chr1	P	68	89.706	2081430	2081497	17009	17071	8.08e-13
chr1	chr1	F	51	96.078	206809	206859	17021	17070	8.08e-13
chr1	chr1	F	51	96.078	1623166	1623216	17021	17070	8.08e-13
chr1	chr1	P	51	96.078	276876	276926	17021	17070	8.08e-13
chr1	chr1	F	44	100	206706	206749	24646	24689	8.08e-13
chr1	chr1	P	44	100	276986	277029	24646	24689	8.08e-13
chr1	chr1	P	44	100	850194	850237	38728	38771	8.08e-13
chr1	chr1	P	44	100	842623	842666	38728	38771	8.08e-13
chr1	chr1	P	44	100	2119052	2119095	38810	38853	8.08e-13
chr1	chr1	P	44	100	2115445	2115488	38810	38853	8.08e-13
chr1	chr1	F	44	100	213903	213946	38810	38853	8.08e-13
chr1	chr1	P	44	100	497703	497746	38810	38853	8.08e-13
chr1	chr1	F	44	100	2025371	2025414	38810	38853	8.08e-13
chr1	chr1	F	44	100	2089121	2089164	38810	38853	8.08e-13
chr1	chr1	F	54	94.444	488598	488650	38830	38883	8.08e-13
chr1	chr1	P	51	96.078	738621	738671	38957	39006	8.08e-13
chr1	chr1	P	147	77.551	176187	176331	132930	133071	8.08e-13
chr1	chr1	P	183	75.41	132930	133107	176151	176331	8.08e-13
chr1	chr1	P	47	97.872	1270401	1270447	194079	194125	8.08e-13
chr1	chr1	F	47	97.872	1057024	1057070	194686	194732	8.08e-13
chr1	chr1	P	77	87.013	842599	842671	206783	206857	8.08e-13
chr1	chr1	P	51	96.078	1372264	1372313	206809	206859	8.08e-13
chr1	chr1	P	44	100	1433327	1433370	213903	213946	8.08e-13
chr1	chr1	F	44	100	1623146	1623189	213903	213946	8.08e-13
chr1	chr1	P	44	100	485395	485438	213903	213946	8.08e-13
chr1	chr1	P	44	100	480301	480344	213903	213946	8.08e-13
chr1	chr1	P	44	100	1425613	1425656	241523	241566	8.08e-13
chr1	chr1	F	51	96.078	1372264	1372313	276876	276926	8.08e-13
chr1	chr1	F	77	87.013	842599	842671	276878	276952	8.08e-13
chr1	chr1	P	44	100	1626192	1626235	331753	331796	8.08e-13
chr1	chr1	P	44	100	736439	736482	331753	331796	8.08e-13
chr1	chr1	P	54	94.444	488598	488650	480271	480324	8.08e-13
chr1	chr1	P	44	100	2089121	2089164	480301	480344	8.08e-13
chr1	chr1	P	44	100	2025371	2025414	480301	480344	8.08e-13
chr1	chr1	F	44	100	497703	497746	480301	480344	8.08e-13
chr1	chr1	F	44	100	2115445	2115488	480301	480344	8.08e-13
chr1	chr1	F	44	100	2119052	2119095	480301	480344	8.08e-13
chr1	chr1	P	54	94.444	488598	488650	485365	485418	8.08e-13
chr1	chr1	P	44	100	2089121	2089164	485395	485438	8.08e-13
chr1	chr1	P	44	100	2025371	2025414	485395	485438	8.08e-13
chr1	chr1	F	44	100	497703	497746	485395	485438	8.08e-13
chr1	chr1	F	44	100	2115445	2115488	485395	485438	8.08e-13
chr1	chr1	F	44	100	2119052	2119095	485395	485438	8.08e-13
chr1	chr1	P	54	94.444	1628097	1628150	488598	488650	8.08e-13
chr1	chr1	P	54	94.444	1433297	1433350	488598	488650	8.08e-13
chr1	chr1	P	44	100	1623146	1623189	497703	497746	8.08e-13
chr1	chr1	F	44	100	1433327	1433370	497703	497746	8.08e-13
chr1	chr1	F	149	77.181	1557606	1557751	531609	531754	8.08e-13
chr1	chr1	F	51	96.078	1875279	1875329	545169	545218	8.08e-13
chr1	chr1	F	48	97.917	1510249	1510296	545172	545218	8.08e-13
chr1	chr1	P	44	100	850166	850209	758208	758251	8.08e-13
chr1	chr1	F	44	100	1504391	1504434	814988	815031	8.08e-13
chr1	chr1	P	44	100	1623064	1623107	842623	842666	8.08e-13
chr1	chr1	P	44	100	1623064	1623107	850194	850237	8.08e-13
chr1	chr1	F	134	79.104	956621	956746	956038	956168	8.08e-13
chr1	chr1	F	98	81.633	2076591	2076688	1001831	1001928	8.08e-13
chr1	chr1	F	89	83.146	2074030	2074118	1001839	1001927	8.08e-13
chr1	chr1	F	71	87.324	1516200	1516270	1096058	1096128	8.08e-13
chr1	chr1	P	53	94.34	194079	194131	1270395	1270447	8.08e-13
chr1	chr1	P	51	96.078	1623166	1623216	1372264	1372313	8.08e-13
chr1	chr1	P	44	100	2057665	2057708	1392653	1392696	8.08e-13
chr1	chr1	P	44	100	2089121	2089164	1433327	1433370	8.08e-13
chr1	chr1	P	44	100	2025371	2025414	1433327	1433370	8.08e-13
chr1	chr1	F	44	100	2115445	2115488	1433327	1433370	8.08e-13
chr1	chr1	F	44	100	2119052	2119095	1433327	1433370	8.08e-13
chr1	chr1	P	50	96	1722517	1722566	1465099	1465148	8.08e-13
chr1	chr1	P	82	85.366	1830391	1830470	1502306	1502385	8.08e-13
chr1	chr1	P	197	75.127	2059249	2059439	1542997	1543187	8.08e-13
chr1	chr1	P	44	100	2119052	2119095	1623146	1623189	8.08e-13
chr1	chr1	P	44	100	2115445	2115488	1623146	1623189	8.08e-13
chr1	chr1	F	44	100	2025371	2025414	1623146	1623189	8.08e-13
chr1	chr1	F	44	100	2089121	2089164	1623146	1623189	8.08e-13
chr1	chr1	F	168	76.19	2076894	2077057	2074325	2074488	8.08e-13
chr1	chr1	F	53	94.34	702765	702815	78144	78196	2.91e-12
chr1	chr1	F	64	89.062	1127358	1127421	105379	105442	2.91e-12
chr1	chr1	F	43	100	758208	758250	206817	206859	2.91e-12
chr1	chr1	P	46	97.826	758208	758253	276873	276918	2.91e-12
chr1	chr1	P	66	89.394	499626	499688	332648	332713	2.91e-12
chr1	chr1	F	54	94.444	1634663	1634713	480043	480096	2.91e-12
chr1	chr1	P	70	88.571	2081428	2081497	488586	488650	2.91e-12
chr1	chr1	F	98	82.653	2049445	2049542	567845	567935	2.91e-12
chr1	chr1	F	71	88.732	1372266	1372330	575524	575593	2.91e-12
chr1	chr1	F	43	100	650433	650475	650362	650404	2.91e-12
chr1	chr1	P	43	100	1379675	1379717	758208	758250	2.91e-12
chr1	chr1	F	43	100	1623174	1623216	758208	758250	2.91e-12
chr1	chr1	P	43	100	276876	276918	758208	758250	2.91e-12
chr1	chr1	F	89	83.146	1814557	1814644	785292	785379	2.91e-12
chr1	chr1	P	49	95.918	1313501	1313549	835253	835301	2.91e-12
chr1	chr1	P	46	97.826	1534640	1534685	1076589	1076634	2.91e-12
chr1	chr1	P	136	79.412	1433525	1433653	1369809	1369934	2.91e-12
chr1	chr1	P	142	78.873	1369809	1369940	1433519	1433653	2.91e-12
chr1	chr1	F	128	78.906	1607840	1607961	1607678	1607803	2.91e-12
chr1	chr1	F	49	95.918	2006992	2007040	2006945	2006993	2.91e-12
chr1	chr1	P	45	97.778	1391027	1391071	28441	28485	1.05e-11
chr1	chr1	F	49	95.918	843574	843621	38830	38878	1.05e-11
chr1	chr1	P	48	95.833	988727	988774	112876	112923	1.05e-11
chr1	chr1	P	157	76.433	1434131	1434284	158060	158212	1.05e-11
chr1	chr1	F	49	95.918	488598	488645	206809	206857	1.05e-11
chr1	chr1	F	49	95.918	843574	843621	206809	206857	1.05e-11
chr1	chr1	F	75	85.333	1308884	1308958	260327	260401	1.05e-11
chr1	chr1	P	49	95.918	843574	843621	276878	276926	1.05e-11
chr1	chr1	P	49	95.918	488598	488645	276878	276926	1.05e-11
chr1	chr1	F	141	78.723	1224227	1224351	286524	286663	1.05e-11
chr1	chr1	F	45	97.778	381597	381641	351187	351231	1.05e-11
chr1	chr1	P	74	86.486	2054519	2054588	417018	417091	1.05e-11
chr1	chr1	F	42	100	1504391	1504432	462681	462722	1.05e-11
chr1	chr1	P	45	97.778	1433252	1433296	471211	471255	1.05e-11
chr1	chr1	P	42	100	2081386	2081427	471211	471252	1.05e-11
chr1	chr1	P	49	95.918	843574	843621	480276	480324	1.05e-11
chr1	chr1	P	49	95.918	843574	843621	485370	485418	1.05e-11
chr1	chr1	P	73	87.671	575523	575594	488580	488646	1.05e-11
chr1	chr1	P	49	95.918	850169	850217	488598	488645	1.05e-11
chr1	chr1	F	49	95.918	1623166	1623214	488598	488645	1.05e-11
chr1	chr1	F	86	84.884	927808	927884	643131	643216	1.05e-11
chr1	chr1	F	45	97.778	1433373	1433417	732481	732525	1.05e-11
chr1	chr1	P	49	95.918	1628102	1628150	843574	843621	1.05e-11
chr1	chr1	P	49	95.918	1433302	1433350	843574	843621	1.05e-11
chr1	chr1	P	49	95.918	850169	850217	843574	843621	1.05e-11
chr1	chr1	F	49	95.918	1623166	1623214	843574	843621	1.05e-11
chr1	chr1	P	55	92.727	488598	488651	850163	850217	1.05e-11
chr1	chr1	F	56	92.857	2081430	2081485	850166	850217	1.05e-11
chr1	chr1	P	191	75.393	1037103	1037288	962149	962328	1.05e-11
chr1	chr1	P	221	74.208	962149	962358	1037073	1037288	1.05e-11
chr1	chr1	P	244	73.361	158060	158298	1434049	1434284	1.05e-11
chr1	chr1	P	48	95.833	1667299	1667346	1555399	1555446	1.05e-11
chr1	chr1	P	65	89.231	2081421	2081485	1623166	1623226	1.05e-11
chr1	chr1	P	42	100	1555405	1555446	1667299	1667340	1.05e-11
chr1	chr1	P	67	88.06	1965717	1965782	1838308	1838373	1.05e-11
chr1	chr1	P	51	94.118	1838323	1838373	1965717	1965767	1.05e-11
chr1	chr1	P	53	92.453	1530894	1530946	42457	42509	3.76e-11
chr1	chr1	P	146	76.712	1279939	1280081	82967	83109	3.76e-11
chr1	chr1	P	41	100	650044	650084	108865	108905	3.76e-11
chr1	chr1	P	344	71.221	176543	176881	132388	132725	3.76e-11
chr1	chr1	F	60	90	1256422	1256480	153010	153068	3.76e-11
chr1	chr1	P	55	92.727	2081431	2081485	206809	206859	3.76e-11
chr1	chr1	P	55	92.727	1978087	1978141	206809	206859	3.76e-11
chr1	chr1	F	58	91.379	2081428	2081485	276873	276926	3.76e-11
chr1	chr1	F	55	92.727	1978087	1978141	276876	276926	3.76e-11
chr1	chr1	P	65	87.692	1083480	1083544	287833	287897	3.76e-11
chr1	chr1	P	65	89.231	1133385	1133445	327641	327703	3.76e-11
chr1	chr1	F	70	87.143	1433505	1433574	332076	332142	3.76e-11
chr1	chr1	F	64	89.062	1978078	1978141	485359	485418	3.76e-11
chr1	chr1	P	53	92.453	1179022	1179074	550208	550260	3.76e-11
chr1	chr1	F	47	95.745	1031720	1031766	571544	571590	3.76e-11
chr1	chr1	P	44	97.727	1681091	1681134	667093	667136	3.76e-11
chr1	chr1	F	98	82.653	1612787	1612873	707430	707527	3.76e-11
chr1	chr1	P	47	95.745	1555405	1555451	758203	758249	3.76e-11
chr1	chr1	P	47	95.745	1181057	1181103	806139	806185	3.76e-11
chr1	chr1	F	55	92.727	1978087	1978141	850167	850217	3.76e-11
chr1	chr1	P	68	88.235	1077603	1077665	909656	909723	3.76e-11
chr1	chr1	F	53	92.453	1877544	1877596	944205	944257	3.76e-11
chr1	chr1	P	47	95.745	550214	550260	1179022	1179068	3.76e-11
chr1	chr1	P	41	100	1701379	1701419	1181057	1181097	3.76e-11
chr1	chr1	P	41	100	806145	806185	1181057	1181097	3.76e-11
chr1	chr1	F	61	90.164	1775806	1775865	1213344	1213401	3.76e-11
chr1	chr1	F	52	94.231	1750436	1750484	1274452	1274503	3.76e-11
chr1	chr1	P	41	100	1555406	1555446	1358947	1358987	3.76e-11
chr1	chr1	F	68	88.235	2081430	2081497	1372263	1372325	3.76e-11
chr1	chr1	F	50	94	1465099	1465148	1384282	1384331	3.76e-11
chr1	chr1	F	64	89.062	1978078	1978141	1433291	1433350	3.76e-11
chr1	chr1	F	41	100	2037568	2037608	1504488	1504528	3.76e-11
chr1	chr1	P	56	91.071	42457	42512	1530891	1530946	3.76e-11
chr1	chr1	P	47	95.745	1181057	1181103	1701373	1701419	3.76e-11
chr1	chr1	F	60	90	1814682	1814740	1751292	1751351	3.76e-11
chr1	chr1	F	66	87.879	1819950	1820014	1819881	1819945	3.76e-11
chr1	chr1	P	58	91.379	206809	206862	2081428	2081485	3.76e-11
chr1	chr1	F	105	80	731177	731279	22723	22825	1.35e-10
chr1	chr1	P	90	83.333	1751629	1751715	31034	31116	1.35e-10
chr1	chr1	F	49	93.878	1622996	1623044	38632	38680	1.35e-10
chr1	chr1	F	49	93.878	1622968	1623016	38660	38708	1.35e-10
chr1	chr1	F	40	100	1750699	1750738	39067	39106	1.35e-10
chr1	chr1	P	40	100	236640	236679	134974	135013	1.35e-10
chr1	chr1	P	89	83.146	1137926	1138007	205812	205900	1.35e-10
chr1	chr1	P	50	94	1433252	1433301	220590	220638	1.35e-10
chr1	chr1	P	47	95.745	2081386	2081432	220590	220635	1.35e-10
chr1	chr1	P	117	79.487	326239	326350	272581	272692	1.35e-10
chr1	chr1	F	56	91.071	1208334	1208389	303847	303901	1.35e-10
chr1	chr1	P	50	94	1488894	1488942	308871	308920	1.35e-10
chr1	chr1	P	49	93.878	842598	842646	488598	488646	1.35e-10
chr1	chr1	F	40	100	1352672	1352711	512523	512562	1.35e-10
chr1	chr1	F	47	95.745	676283	676328	542502	542548	1.35e-10
chr1	chr1	F	40	100	1986944	1986983	543045	543084	1.35e-10
chr1	chr1	F	58	89.655	801523	801580	683601	683658	1.35e-10
chr1	chr1	F	58	89.655	1696757	1696814	683601	683658	1.35e-10
chr1	chr1	P	53	92.453	1877544	1877595	736575	736627	1.35e-10
chr1	chr1	P	49	93.878	843574	843622	842598	842646	1.35e-10
chr1	chr1	F	50	94	1555397	1555446	850161	850209	1.35e-10
chr1	chr1	F	46	95.652	1663661	1663706	1033297	1033342	1.35e-10
chr1	chr1	P	40	100	1640063	1640102	1070137	1070176	1.35e-10
chr1	chr1	P	92	82.609	205812	205903	1137923	1138007	1.35e-10
chr1	chr1	F	70	85.714	1220064	1220133	1219720	1219789	1.35e-10
chr1	chr1	F	40	100	1525802	1525841	1280361	1280400	1.35e-10
chr1	chr1	F	89	82.022	2077715	2077801	1295177	1295265	1.35e-10
chr1	chr1	F	43	97.674	1965714	1965756	1319606	1319648	1.35e-10
chr1	chr1	P	53	92.453	1877544	1877595	1626328	1626380	1.35e-10
chr1	chr1	P	97	81.443	1830390	1830484	1678183	1678276	1.35e-10
chr1	chr1	F	97	81.443	1830390	1830484	1796985	1797078	1.35e-10
chr1	chr1	F	133	76.692	2121286	2121418	1864428	1864560	1.35e-10
chr1	chr1	F	103	80.583	1930847	1930949	1930763	1930860	1.35e-10
chr1	chr1	P	48	93.75	842599	842646	17021	17068	4.87e-10
chr1	chr1	P	49	93.878	575524	575571	17021	17068	4.87e-10
chr1	chr1	P	61	88.525	493284	493344	17196	17254	4.87e-10
chr1	chr1	F	51	92.157	772010	772060	24678	24728	4.87e-10
chr1	chr1	P	63	87.302	1501912	1501974	34225	34287	4.87e-10
chr1	chr1	P	66	86.364	2023760	2023825	45821	45886	4.87e-10
chr1	chr1	P	105	79.048	1040761	1040865	66328	66432	4.87e-10
chr1	chr1	P	42	97.619	819171	819212	91151	91192	4.87e-10
chr1	chr1	F	48	93.75	180857	180904	180801	180848	4.87e-10
chr1	chr1	F	63	87.302	1501912	1501974	194959	195021	4.87e-10
chr1	chr1	P	75	84	1158180	1158254	260327	260401	4.87e-10
chr1	chr1	F	113	80.531	1768727	1768833	286921	287024	4.87e-10
chr1	chr1	P	127	77.165	1976781	1976906	394485	394610	4.87e-10
chr1	chr1	P	119	78.151	1531919	1532033	451434	451552	4.87e-10
chr1	chr1	F	45	95.556	469433	469477	467488	467532	4.87e-10
chr1	chr1	F	51	92.157	961729	961779	479962	480012	4.87e-10
chr1	chr1	F	57	89.474	1726186	1726242	492904	492960	4.87e-10
chr1	chr1	P	39	100	1178289	1178327	518468	518506	4.87e-10
chr1	chr1	F	39	100	1432719	1432757	638558	638596	4.87e-10
chr1	chr1	P	53	92.453	1754854	1754905	649977	650027	4.87e-10
chr1	chr1	P	45	95.556	754502	754546	736558	736602	4.87e-10
chr1	chr1	P	51	92.157	1626311	1626361	754496	754546	4.87e-10
chr1	chr1	P	51	92.157	736558	736608	754496	754546	4.87e-10
chr1	chr1	F	45	95.556	1846278	1846322	814702	814746	4.87e-10
chr1	chr1	F	130	76.923	1500942	1501070	820018	820146	4.87e-10
chr1	chr1	F	48	93.75	1372266	1372313	842599	842646	4.87e-10
chr1	chr1	F	49	93.878	1379677	1379725	842599	842646	4.87e-10
chr1	chr1	P	75	84	1254261	1254335	918536	918610	4.87e-10
chr1	chr1	F	198	74.242	1542538	1542727	962147	962340	4.87e-10
chr1	chr1	F	60	88.333	1883077	1883136	1030422	1030481	4.87e-10
chr1	chr1	P	116	78.448	1388250	1388365	1031911	1032022	4.87e-10
chr1	chr1	P	72	84.722	918539	918610	1254261	1254332	4.87e-10
chr1	chr1	F	45	95.556	1374091	1374135	1374047	1374091	4.87e-10
chr1	chr1	P	51	92.157	1667297	1667347	1379669	1379719	4.87e-10
chr1	chr1	F	39	100	1796823	1796861	1431071	1431109	4.87e-10
chr1	chr1	P	63	87.302	1751378	1751440	1501912	1501974	4.87e-10
chr1	chr1	F	51	92.157	1667297	1667347	1623172	1623222	4.87e-10
chr1	chr1	P	45	95.556	754502	754546	1626311	1626355	4.87e-10
chr1	chr1	F	45	95.556	1978056	1978100	1641749	1641793	4.87e-10
chr1	chr1	F	45	95.556	1846278	1846322	1709936	1709980	4.87e-10
chr1	chr1	P	130	76.923	394485	394613	1976778	1976906	4.87e-10
chr1	chr1	P	69	85.507	45821	45889	2023757	2023825	4.87e-10
chr1	chr1	F	38	100	603421	603458	33473	33510	1.75e-09
chr1	chr1	F	38	100	1493913	1493950	38375	38412	1.75e-09
chr1	chr1	F	50	92	332093	332142	38405	38454	1.75e-09
chr1	chr1	F	44	95.455	1667297	1667340	38836	38879	1.75e-09
chr1	chr1	P	54	90.741	485140	485193	60462	60514	1.75e-09
chr1	chr1	F	70	85.714	1627211	1627280	60761	60827	1.75e-09
chr1	chr1	P	42	97.619	1924549	1924589	90051	90092	1.75e-09
chr1	chr1	P	56	89.286	1839449	1839504	90152	90207	1.75e-09
chr1	chr1	P	44	95.455	1066433	1066476	128164	128207	1.75e-09
chr1	chr1	F	66	86.364	1603106	1603170	206678	206743	1.75e-09
chr1	chr1	F	44	95.455	1667297	1667340	206815	206858	1.75e-09
chr1	chr1	P	51	92.157	1555397	1555446	206817	206867	1.75e-09
chr1	chr1	P	62	87.097	732464	732525	220540	220601	1.75e-09
chr1	chr1	F	61	88.525	1555388	1555446	276859	276918	1.75e-09
chr1	chr1	P	44	95.455	1667297	1667340	276877	276920	1.75e-09
chr1	chr1	P	66	86.364	1603106	1603170	276992	277057	1.75e-09
chr1	chr1	P	57	89.474	431435	431490	289396	289451	1.75e-09
chr1	chr1	F	38	100	468950	468987	468891	468928	1.75e-09
chr1	chr1	P	44	95.455	1667297	1667340	480275	480318	1.75e-09
chr1	chr1	P	48	93.75	60468	60514	485140	485187	1.75e-09
chr1	chr1	P	44	95.455	1667297	1667340	485369	485412	1.75e-09
chr1	chr1	F	53	90.566	1986983	1987035	514165	514217	1.75e-09
chr1	chr1	P	53	90.566	2007798	2007850	522939	522991	1.75e-09
chr1	chr1	F	136	76.471	2073984	2074117	531626	531759	1.75e-09
chr1	chr1	P	129	76.744	1148023	1148150	531995	532122	1.75e-09
chr1	chr1	F	70	85.714	862865	862931	559591	559660	1.75e-09
chr1	chr1	P	108	78.704	756609	756714	617209	617316	1.75e-09
chr1	chr1	P	143	76.224	1001776	1001918	730244	730380	1.75e-09
chr1	chr1	P	90	81.111	617227	617316	756609	756696	1.75e-09
chr1	chr1	F	59	88.136	1563537	1563595	800363	800421	1.75e-09
chr1	chr1	P	81	82.716	1478126	1478205	810558	810637	1.75e-09
chr1	chr1	P	65	87.692	2081433	2081497	843562	843621	1.75e-09
chr1	chr1	F	71	85.915	1876675	1876739	846077	846147	1.75e-09
chr1	chr1	P	44	95.455	1667297	1667340	850168	850211	1.75e-09
chr1	chr1	P	48	93.75	1834254	1834301	974661	974707	1.75e-09
chr1	chr1	P	152	75.658	730244	730389	1001767	1001918	1.75e-09
chr1	chr1	P	41	97.561	128167	128207	1066433	1066473	1.75e-09
chr1	chr1	F	89	82.022	1075146	1075228	1071426	1071514	1.75e-09
chr1	chr1	P	75	84	1750053	1750127	1111312	1111385	1.75e-09
chr1	chr1	P	58	89.655	1379678	1379735	1213437	1213491	1.75e-09
chr1	chr1	F	56	89.286	1335044	1335099	1254261	1254316	1.75e-09
chr1	chr1	P	138	76.812	2028996	2029126	1315269	1315405	1.75e-09
chr1	chr1	F	71	85.915	1603420	1603486	1361769	1361838	1.75e-09
chr1	chr1	P	38	100	1493913	1493950	1369927	1369964	1.75e-09
chr1	chr1	P	91	81.319	1819101	1819188	1423531	1423620	1.75e-09
chr1	chr1	P	44	95.455	1667297	1667340	1433301	1433344	1.75e-09
chr1	chr1	P	84	82.143	1705792	1705874	1478123	1478205	1.75e-09
chr1	chr1	P	84	82.143	810558	810640	1478123	1478205	1.75e-09
chr1	chr1	P	61	88.525	206817	206876	1555388	1555446	1.75e-09
chr1	chr1	F	59	88.136	1695597	1695655	1563537	1563595	1.75e-09
chr1	chr1	F	121	79.339	1830390	1830507	1590124	1590231	1.75e-09
chr1	chr1	P	44	95.455	1667297	1667340	1628101	1628144	1.75e-09
chr1	chr1	P	81	82.716	1478126	1478205	1705792	1705871	1.75e-09
chr1	chr1	F	44	95.455	758208	758251	17029	17071	6.29e-09
chr1	chr1	F	52	90.385	1814689	1814740	34147	34198	6.29e-09
chr1	chr1	F	43	95.349	1358945	1358987	38836	38878	6.29e-09
chr1	chr1	P	253	71.937	491021	491268	89739	89990	6.29e-09
chr1	chr1	F	37	100	663847	663883	103978	104014	6.29e-09
chr1	chr1	P	52	90.385	1340565	1340616	105953	106004	6.29e-09
chr1	chr1	P	49	91.837	1814692	1814740	195051	195099	6.29e-09
chr1	chr1	F	43	95.349	1358945	1358987	206815	206857	6.29e-09
chr1	chr1	P	53	90.566	732461	732511	208569	208621	6.29e-09
chr1	chr1	P	40	97.5	427579	427618	217956	217995	6.29e-09
chr1	chr1	P	37	100	1565489	1565525	260019	260055	6.29e-09
chr1	chr1	P	43	95.349	1358945	1358987	276878	276920	6.29e-09
chr1	chr1	P	62	87.097	1300983	1301044	358837	358897	6.29e-09
chr1	chr1	F	46	93.478	509468	509513	430911	430956	6.29e-09
chr1	chr1	P	37	100	729861	729897	451423	451459	6.29e-09
chr1	chr1	F	43	95.349	470125	470167	469482	469524	6.29e-09
chr1	chr1	F	37	100	1377100	1377136	474077	474113	6.29e-09
chr1	chr1	P	37	100	540445	540481	474077	474113	6.29e-09
chr1	chr1	P	43	95.349	1358945	1358987	480276	480318	6.29e-09
chr1	chr1	P	43	95.349	1358945	1358987	485370	485412	6.29e-09
chr1	chr1	P	156	75.641	1976754	1976900	491150	491304	6.29e-09
chr1	chr1	P	57	89.474	681489	681543	526420	526474	6.29e-09
chr1	chr1	P	46	93.478	1634483	1634528	542502	542547	6.29e-09
chr1	chr1	F	37	100	1603258	1603294	547703	547739	6.29e-09
chr1	chr1	F	73	83.562	1025355	1025427	589823	589895	6.29e-09
chr1	chr1	F	50	92	1429879	1429928	602078	602126	6.29e-09
chr1	chr1	P	51	92.157	2081427	2081477	758208	758254	6.29e-09
chr1	chr1	P	44	95.455	1372263	1372305	758208	758251	6.29e-09
chr1	chr1	P	40	97.5	1842878	1842917	768568	768607	6.29e-09
chr1	chr1	P	81	82.716	1966278	1966357	804823	804900	6.29e-09
chr1	chr1	P	43	95.349	1358945	1358987	850169	850211	6.29e-09
chr1	chr1	P	64	87.5	1642763	1642825	850575	850633	6.29e-09
chr1	chr1	F	56	89.286	852893	852947	852817	852872	6.29e-09
chr1	chr1	F	43	95.349	953906	953948	953863	953905	6.29e-09
chr1	chr1	P	96	80.208	1966241	1966335	1031817	1031910	6.29e-09
chr1	chr1	F	49	91.837	1664371	1664419	1044111	1044159	6.29e-09
chr1	chr1	F	94	80.851	1469945	1470033	1142877	1142970	6.29e-09
chr1	chr1	P	67	85.075	2129534	2129600	1148429	1148495	6.29e-09
chr1	chr1	P	59	88.136	1964216	1964274	1227488	1227545	6.29e-09
chr1	chr1	F	55	89.091	1319907	1319961	1318542	1318596	6.29e-09
chr1	chr1	F	69	85.507	1965156	1965222	1320566	1320633	6.29e-09
chr1	chr1	P	49	91.837	105962	106010	1340559	1340607	6.29e-09
chr1	chr1	F	77	83.117	2034153	2034228	1352773	1352849	6.29e-09
chr1	chr1	P	43	95.349	1628102	1628144	1358945	1358987	6.29e-09
chr1	chr1	P	43	95.349	1433302	1433344	1358945	1358987	6.29e-09
chr1	chr1	P	43	95.349	1379677	1379719	1358945	1358987	6.29e-09
chr1	chr1	F	43	95.349	1623172	1623214	1358945	1358987	6.29e-09
chr1	chr1	F	145	76.552	1606039	1606176	1605673	1605812	6.29e-09
chr1	chr1	P	73	84.932	850575	850642	1642754	1642825	6.29e-09
chr1	chr1	P	81	82.716	1966278	1966357	1700057	1700134	6.29e-09
chr1	chr1	P	52	90.385	195051	195102	1814689	1814740	6.29e-09
chr1	chr1	P	37	100	768571	768607	1842878	1842914	6.29e-09
chr1	chr1	F	44	95.455	1978117	1978160	1876985	1877027	6.29e-09
chr1	chr1	F	43	95.349	1915483	1915525	1915316	1915358	6.29e-09
chr1	chr1	P	94	80.851	1031820	1031910	1966241	1966332	6.29e-09
chr1	chr1	P	153	75.817	491153	491304	1976754	1976897	6.29e-09
chr1	chr1	F	57	87.719	38618	38674	9795	9851	2.26e-08
chr1	chr1	F	36	100	84151	84186	33835	33870	2.26e-08
chr1	chr1	P	42	95.238	1555405	1555446	38838	38879	2.26e-08
chr1	chr1	P	45	93.333	1432738	1432782	85502	85546	2.26e-08
chr1	chr1	P	39	97.436	1870078	1870116	236480	236518	2.26e-08
chr1	chr1	F	36	100	480061	480096	268750	268785	2.26e-08
chr1	chr1	F	98	80.612	918239	918330	286543	286637	2.26e-08
chr1	chr1	P	55	89.091	350443	350496	292591	292644	2.26e-08
chr1	chr1	P	36	100	738654	738689	309005	309040	2.26e-08
chr1	chr1	F	111	77.477	1111075	1111185	371768	371878	2.26e-08
chr1	chr1	F	42	95.238	1555405	1555446	480275	480316	2.26e-08
chr1	chr1	F	42	95.238	1555405	1555446	485369	485410	2.26e-08
chr1	chr1	F	45	93.333	1364255	1364299	488577	488621	2.26e-08
chr1	chr1	F	49	91.837	887335	887382	488599	488646	2.26e-08
chr1	chr1	F	46	93.478	758208	758253	488606	488650	2.26e-08
chr1	chr1	F	81	81.481	751711	751791	504329	504409	2.26e-08
chr1	chr1	P	39	97.436	913434	913472	607426	607464	2.26e-08
chr1	chr1	F	36	100	926530	926565	639839	639874	2.26e-08
chr1	chr1	P	129	75.969	2073067	2073195	731158	731286	2.26e-08
chr1	chr1	P	39	97.436	309005	309043	738651	738689	2.26e-08
chr1	chr1	F	42	95.238	1667299	1667340	758208	758249	2.26e-08
chr1	chr1	P	55	89.091	1876976	1877028	843553	843607	2.26e-08
chr1	chr1	P	63	87.302	1835017	1835074	843557	843618	2.26e-08
chr1	chr1	F	49	91.837	887335	887382	843575	843622	2.26e-08
chr1	chr1	P	45	93.333	932861	932905	915438	915482	2.26e-08
chr1	chr1	P	57	87.719	992645	992701	992642	992698	2.26e-08
chr1	chr1	F	84	80.952	2076033	2076116	1001252	1001335	2.26e-08
chr1	chr1	F	52	90.385	1503370	1503419	1230144	1230195	2.26e-08
chr1	chr1	F	39	97.436	1602102	1602140	1243992	1244030	2.26e-08
chr1	chr1	P	48	91.667	1272008	1272055	1244850	1244897	2.26e-08
chr1	chr1	P	54	88.889	1316612	1316665	1251383	1251436	2.26e-08
chr1	chr1	F	48	91.667	1302643	1302690	1302610	1302657	2.26e-08
chr1	chr1	P	71	84.507	1372266	1372334	1358918	1358987	2.26e-08
chr1	chr1	P	68	85.294	1667274	1667340	1372265	1372330	2.26e-08
chr1	chr1	F	63	87.302	1835017	1835074	1372269	1372330	2.26e-08
chr1	chr1	F	58	87.931	1876976	1877032	1372280	1372337	2.26e-08
chr1	chr1	F	42	95.238	1555405	1555446	1379676	1379717	2.26e-08
chr1	chr1	P	48	91.667	85502	85549	1432735	1432782	2.26e-08
chr1	chr1	F	42	95.238	1555405	1555446	1433301	1433342	2.26e-08
chr1	chr1	P	42	95.238	1623174	1623215	1555405	1555446	2.26e-08
chr1	chr1	F	42	95.238	1628101	1628142	1555405	1555446	2.26e-08
chr1	chr1	F	106	78.302	2076542	2076646	1557612	1557716	2.26e-08
chr1	chr1	F	39	97.436	1877111	1877149	1634677	1634715	2.26e-08
chr1	chr1	F	36	100	1902765	1902800	1898501	1898536	2.26e-08
chr1	chr1	F	42	95.238	2081219	2081260	2034794	2034835	2.26e-08
chr1	chr1	P	114	77.193	731176	731289	2073064	2073177	2.26e-08
chr1	chr1	F	44	93.182	1622967	1623010	9808	9851	8.14e-08
chr1	chr1	F	44	93.182	521971	522014	14697	14740	8.14e-08
chr1	chr1	F	48	91.667	887335	887381	17022	17068	8.14e-08
chr1	chr1	F	38	97.368	1434872	1434909	25109	25146	8.14e-08
chr1	chr1	F	121	77.686	464629	464743	31199	31316	8.14e-08
chr1	chr1	P	38	97.368	42434	42471	34577	34614	8.14e-08
chr1	chr1	F	57	87.719	476190	476245	39122	39178	8.14e-08
chr1	chr1	F	63	85.714	2032724	2032786	41304	41364	8.14e-08
chr1	chr1	F	38	97.368	1592818	1592855	42434	42471	8.14e-08
chr1	chr1	F	59	86.441	2070922	2070980	82979	83037	8.14e-08
chr1	chr1	F	50	90	949094	949143	123610	123659	8.14e-08
chr1	chr1	F	35	100	740772	740806	268724	268758	8.14e-08
chr1	chr1	F	38	97.368	1877112	1877149	268750	268787	8.14e-08
chr1	chr1	P	61	86.885	1813565	1813622	276574	276634	8.14e-08
chr1	chr1	F	35	100	1986990	1987024	310615	310649	8.14e-08
chr1	chr1	F	35	100	2038409	2038443	324359	324393	8.14e-08
chr1	chr1	P	38	97.368	1457657	1457694	367313	367350	8.14e-08
chr1	chr1	F	80	82.5	1862439	1862515	393649	393726	8.14e-08
chr1	chr1	F	45	93.333	400465	400508	400409	400453	8.14e-08
chr1	chr1	F	50	90	726172	726221	403325	403374	8.14e-08
chr1	chr1	F	48	91.667	887335	887381	452672	452719	8.14e-08
chr1	chr1	P	63	85.714	2032724	2032786	472263	472323	8.14e-08
chr1	chr1	F	38	97.368	1877110	1877147	480059	480096	8.14e-08
chr1	chr1	P	35	100	544244	544278	482762	482796	8.14e-08
chr1	chr1	P	59	86.441	2093196	2093254	491240	491298	8.14e-08
chr1	chr1	P	74	82.432	1641687	1641760	504336	504409	8.14e-08
chr1	chr1	P	35	100	1305357	1305391	505681	505715	8.14e-08
chr1	chr1	F	44	93.182	1288823	1288866	531149	531192	8.14e-08
chr1	chr1	F	56	87.5	1988180	1988235	546246	546301	8.14e-08
chr1	chr1	P	72	84.722	1213431	1213495	575521	575592	8.14e-08
chr1	chr1	F	83	81.928	1830910	1830992	639095	639171	8.14e-08
chr1	chr1	P	98	78.571	2077692	2077789	729139	729236	8.14e-08
chr1	chr1	P	90	80	740155	740243	729447	729535	8.14e-08
chr1	chr1	F	116	76.724	1349223	1349338	753145	753260	8.14e-08
chr1	chr1	F	41	95.122	1358947	1358987	758208	758248	8.14e-08
chr1	chr1	F	41	95.122	854450	854490	785041	785081	8.14e-08
chr1	chr1	F	44	93.182	1276507	1276550	826010	826053	8.14e-08
chr1	chr1	F	67	85.075	1358922	1358987	843557	843621	8.14e-08
chr1	chr1	F	67	85.075	1667274	1667339	843557	843621	8.14e-08
chr1	chr1	P	35	100	1368430	1368464	853993	854027	8.14e-08
chr1	chr1	F	50	90	1373326	1373375	882834	882883	8.14e-08
chr1	chr1	P	48	91.667	1372266	1372312	887335	887381	8.14e-08
chr1	chr1	F	35	100	1547657	1547691	1160721	1160755	8.14e-08
chr1	chr1	P	69	84.058	1943213	1943280	1348715	1348782	8.14e-08
chr1	chr1	P	47	91.489	1978114	1978160	1364257	1364303	8.14e-08
chr1	chr1	F	35	100	1368700	1368734	1368258	1368292	8.14e-08
chr1	chr1	F	35	100	1628046	1628080	1433267	1433301	8.14e-08
chr1	chr1	P	35	100	1982855	1982889	1462701	1462735	8.14e-08
chr1	chr1	P	48	91.667	1951743	1951790	1478166	1478212	8.14e-08
chr1	chr1	F	38	97.368	1775898	1775935	1578658	1578695	8.14e-08
chr1	chr1	P	35	100	1641759	1641793	1623203	1623237	8.14e-08
chr1	chr1	F	35	100	1952118	1952152	1902764	1902798	8.14e-08
chr1	chr1	P	63	85.714	1348721	1348782	1943213	1943274	8.14e-08
chr1	chr1	P	107	77.57	729142	729248	2077680	2077786	8.14e-08
chr1	chr1	P	65	84.615	491246	491310	2093184	2093248	8.14e-08
chr1	chr1	P	64	84.375	485454	485517	9798	9861	2.93e-07
chr1	chr1	F	50	90	452671	452720	17021	17069	2.93e-07
chr1	chr1	P	166	74.096	262920	263083	18456	18617	2.93e-07
chr1	chr1	P	40	95	188490	188529	34186	34225	2.93e-07
chr1	chr1	F	34	100	1568597	1568630	53257	53290	2.93e-07
chr1	chr1	P	86	81.395	156467	156545	128331	128416	2.93e-07
chr1	chr1	P	41	95.122	702768	702806	152423	152463	2.93e-07
chr1	chr1	P	89	80.899	128331	128419	156464	156545	2.93e-07
chr1	chr1	P	40	95	1751339	1751378	188490	188529	2.93e-07
chr1	chr1	P	52	88.462	2081503	2081554	220530	220581	2.93e-07
chr1	chr1	P	51	90.196	2081552	2081602	220530	220577	2.93e-07
chr1	chr1	F	60	86.667	771862	771921	222497	222552	2.93e-07
chr1	chr1	F	50	90	1186901	1186949	236384	236433	2.93e-07
chr1	chr1	P	163	74.233	18459	18617	262920	263080	2.93e-07
chr1	chr1	P	40	95	322317	322356	265817	265856	2.93e-07
chr1	chr1	P	38	97.368	738648	738685	268774	268810	2.93e-07
chr1	chr1	P	46	91.304	344180	344225	344180	344225	2.93e-07
chr1	chr1	F	34	100	640691	640724	391273	391306	2.93e-07
chr1	chr1	F	37	97.297	974693	974729	427143	427179	2.93e-07
chr1	chr1	P	50	90	1594028	1594076	438598	438646	2.93e-07
chr1	chr1	P	50	90	1372265	1372313	452671	452720	2.93e-07
chr1	chr1	P	53	88.679	1876976	1877027	488579	488631	2.93e-07
chr1	chr1	P	64	85.938	1835017	1835075	488580	488642	2.93e-07
chr1	chr1	F	54	88.889	1578589	1578639	488592	488644	2.93e-07
chr1	chr1	F	37	97.297	1902762	1902798	505679	505715	2.93e-07
chr1	chr1	P	34	100	1165946	1165979	531402	531435	2.93e-07
chr1	chr1	P	40	95	849055	849094	538776	538815	2.93e-07
chr1	chr1	F	37	97.297	1638543	1638579	540238	540274	2.93e-07
chr1	chr1	F	50	90	842598	842646	575523	575571	2.93e-07
chr1	chr1	F	76	82.895	850169	850243	575524	575594	2.93e-07
chr1	chr1	F	76	82.895	1628102	1628176	575524	575594	2.93e-07
chr1	chr1	F	74	82.432	1839999	1840072	604871	604943	2.93e-07
chr1	chr1	P	37	97.297	1952116	1952152	614378	614414	2.93e-07
chr1	chr1	P	44	93.182	152423	152466	702765	702806	2.93e-07
chr1	chr1	F	41	95.122	843582	843621	758208	758248	2.93e-07
chr1	chr1	P	43	93.023	1951075	1951117	765753	765795	2.93e-07
chr1	chr1	F	46	91.304	1472562	1472607	784194	784239	2.93e-07
chr1	chr1	P	46	91.304	834893	834938	834893	834938	2.93e-07
chr1	chr1	F	62	85.484	1533313	1533374	834998	835058	2.93e-07
chr1	chr1	F	34	100	1876976	1877009	842613	842646	2.93e-07
chr1	chr1	P	37	97.297	1986947	1986983	881946	881982	2.93e-07
chr1	chr1	F	58	87.931	899650	899705	896997	897051	2.93e-07
chr1	chr1	F	127	77.165	955751	955868	955592	955715	2.93e-07
chr1	chr1	P	34	100	1250099	1250132	971911	971944	2.93e-07
chr1	chr1	P	37	97.297	1434483	1434519	1020674	1020710	2.93e-07
chr1	chr1	P	46	91.304	1836533	1836578	1075751	1075796	2.93e-07
chr1	chr1	F	37	97.297	1478175	1478211	1077264	1077300	2.93e-07
chr1	chr1	P	64	85.938	1835014	1835073	1213431	1213493	2.93e-07
chr1	chr1	P	68	85.294	1978090	1978157	1213431	1213491	2.93e-07
chr1	chr1	P	274	71.533	2070909	2071178	1279818	1280083	2.93e-07
chr1	chr1	P	37	97.297	1952117	1952153	1305356	1305392	2.93e-07
chr1	chr1	P	37	97.297	1638543	1638579	1377307	1377343	2.93e-07
chr1	chr1	F	61	85.246	1434872	1434932	1384374	1384434	2.93e-07
chr1	chr1	F	47	91.489	1431404	1431450	1431362	1431407	2.93e-07
chr1	chr1	P	34	100	1020677	1020710	1434483	1434516	2.93e-07
chr1	chr1	F	37	97.297	1818377	1818413	1434950	1434986	2.93e-07
chr1	chr1	P	50	90	1685606	1685654	1478133	1478181	2.93e-07
chr1	chr1	F	89	79.775	1793077	1793163	1590123	1590211	2.93e-07
chr1	chr1	P	53	88.679	438598	438649	1594025	1594076	2.93e-07
chr1	chr1	F	57	87.719	2087191	2087246	1631238	1631292	2.93e-07
chr1	chr1	P	43	93.023	2054486	2054528	1652452	1652494	2.93e-07
chr1	chr1	P	79	82.278	1978081	1978158	1667274	1667347	2.93e-07
chr1	chr1	F	41	95.122	1735359	1735398	1734141	1734181	2.93e-07
chr1	chr1	P	34	100	1979693	1979726	1746823	1746856	2.93e-07
chr1	chr1	P	37	97.297	2031659	2031695	1769311	1769347	2.93e-07
chr1	chr1	P	71	83.099	488579	488649	1876958	1877027	2.93e-07
chr1	chr1	F	34	100	1952119	1952152	1898501	1898534	2.93e-07
chr1	chr1	F	43	93.023	1915455	1915497	1915318	1915360	2.93e-07
chr1	chr1	P	40	95	881946	881985	1986944	1986983	2.93e-07
chr1	chr1	F	56	87.5	2005124	2005178	2005056	2005111	2.93e-07
chr1	chr1	F	38	97.368	2006812	2006848	2006770	2006807	2.93e-07
chr1	chr1	F	37	97.297	2007794	2007830	2007719	2007755	2.93e-07
chr1	chr1	P	37	97.297	1652458	1652494	2054486	2054522	2.93e-07
chr1	chr1	P	55	87.273	220530	220584	2081500	2081554	2.93e-07
chr1	chr1	P	45	91.111	1628195	1628239	9785	9829	1.05e-06
chr1	chr1	F	68	83.824	1667274	1667340	17004	17069	1.05e-06
chr1	chr1	P	42	92.857	1751763	1751804	17135	17176	1.05e-06
chr1	chr1	F	56	87.5	478819	478871	38491	38546	1.05e-06
chr1	chr1	P	50	90	575524	575571	38830	38878	1.05e-06
chr1	chr1	P	45	91.111	1723065	1723109	51765	51809	1.05e-06
chr1	chr1	F	36	97.222	543708	543743	74169	74204	1.05e-06
chr1	chr1	F	57	85.965	554017	554073	80276	80332	1.05e-06
chr1	chr1	P	64	84.375	1726166	1726229	85502	85563	1.05e-06
chr1	chr1	F	36	97.222	1638543	1638578	152482	152517	1.05e-06
chr1	chr1	F	65	84.615	290740	290802	153004	153066	1.05e-06
chr1	chr1	P	36	97.222	1359526	1359561	174913	174948	1.05e-06
chr1	chr1	P	64	85.938	1378321	1378379	206779	206840	1.05e-06
chr1	chr1	F	82	81.707	452643	452720	206780	206858	1.05e-06
chr1	chr1	P	50	90	575524	575571	206809	206857	1.05e-06
chr1	chr1	F	33	100	514166	514198	220540	220572	1.05e-06
chr1	chr1	P	95	80	2056465	2056554	221941	222030	1.05e-06
chr1	chr1	F	36	97.222	225290	225325	225245	225280	1.05e-06
chr1	chr1	F	54	87.037	255703	255756	255624	255677	1.05e-06
chr1	chr1	F	45	91.111	1628195	1628239	264946	264990	1.05e-06
chr1	chr1	P	79	82.278	452646	452720	276877	276952	1.05e-06
chr1	chr1	F	50	90	575524	575571	276878	276926	1.05e-06
chr1	chr1	F	64	85.938	1378321	1378379	276895	276956	1.05e-06
chr1	chr1	P	68	83.824	2022038	2022104	308933	308998	1.05e-06
chr1	chr1	P	75	82.667	524219	524289	320140	320213	1.05e-06
chr1	chr1	P	66	84.848	1266895	1266958	342597	342658	1.05e-06
chr1	chr1	P	55	87.273	1316647	1316700	351187	351240	1.05e-06
chr1	chr1	P	51	88.235	1316651	1316701	381596	381646	1.05e-06
chr1	chr1	F	36	97.222	400206	400241	400159	400194	1.05e-06
chr1	chr1	F	39	94.872	681818	681856	428569	428607	1.05e-06
chr1	chr1	P	82	81.707	276877	276955	452643	452720	1.05e-06
chr1	chr1	F	49	89.796	488598	488645	452671	452719	1.05e-06
chr1	chr1	F	49	89.796	843574	843621	452671	452719	1.05e-06
chr1	chr1	F	50	90	575524	575571	480276	480324	1.05e-06
chr1	chr1	F	50	90	575524	575571	485370	485418	1.05e-06
chr1	chr1	P	75	82.667	320146	320219	524213	524283	1.05e-06
chr1	chr1	F	108	77.778	2076550	2076654	531624	531728	1.05e-06
chr1	chr1	P	131	75.573	729869	729998	531994	532122	1.05e-06
chr1	chr1	F	70	82.857	1750619	1750687	568728	568797	1.05e-06
chr1	chr1	F	80	82.5	1978089	1978163	575524	575598	1.05e-06
chr1	chr1	P	50	90	1623166	1623214	575524	575571	1.05e-06
chr1	chr1	F	50	90	1379677	1379725	575524	575571	1.05e-06
chr1	chr1	F	50	90	1433302	1433350	575524	575571	1.05e-06
chr1	chr1	P	53	88.679	1480661	1480711	582209	582260	1.05e-06
chr1	chr1	F	39	94.872	2032748	2032786	589646	589684	1.05e-06
chr1	chr1	P	40	95	1902761	1902799	614377	614416	1.05e-06
chr1	chr1	P	59	86.441	1805276	1805330	686923	686981	1.05e-06
chr1	chr1	F	39	94.872	693625	693663	693382	693420	1.05e-06
chr1	chr1	P	33	100	1131990	1132022	708535	708567	1.05e-06
chr1	chr1	P	48	89.583	786735	786782	726102	726149	1.05e-06
chr1	chr1	P	137	75.182	531994	532128	729863	729998	1.05e-06
chr1	chr1	P	46	91.304	731018	731062	731018	731062	1.05e-06
chr1	chr1	P	47	91.489	1978087	1978133	758208	758250	1.05e-06
chr1	chr1	P	36	97.222	1952116	1952151	768572	768607	1.05e-06
chr1	chr1	P	43	93.023	1667297	1667339	842599	842640	1.05e-06
chr1	chr1	P	43	93.023	1358945	1358987	842599	842640	1.05e-06
chr1	chr1	F	59	86.441	1578589	1578644	843568	843625	1.05e-06
chr1	chr1	F	70	82.857	900103	900171	892514	892583	1.05e-06
chr1	chr1	P	63	84.127	1230352	1230414	918522	918584	1.05e-06
chr1	chr1	P	102	79.412	1846194	1846293	933916	934007	1.05e-06
chr1	chr1	P	56	87.5	1476023	1476076	977038	977091	1.05e-06
chr1	chr1	P	45	91.111	1131782	1131826	1031774	1031818	1.05e-06
chr1	chr1	F	49	89.796	2045921	2045968	1048881	1048928	1.05e-06
chr1	chr1	P	48	89.583	2043557	2043604	1078059	1078106	1.05e-06
chr1	chr1	F	33	100	1842882	1842914	1082730	1082762	1.05e-06
chr1	chr1	F	33	100	1515930	1515962	1095849	1095881	1.05e-06
chr1	chr1	F	43	93.023	1740174	1740214	1122556	1122598	1.05e-06
chr1	chr1	F	66	83.333	1339760	1339825	1156915	1156980	1.05e-06
chr1	chr1	P	48	89.583	1887118	1887165	1159046	1159093	1.05e-06
chr1	chr1	P	40	95	1595436	1595474	1256434	1256473	1.05e-06
chr1	chr1	P	39	94.872	1961010	1961048	1308808	1308846	1.05e-06
chr1	chr1	P	58	86.207	351187	351243	1316644	1316700	1.05e-06
chr1	chr1	F	51	88.235	1432750	1432800	1382963	1383013	1.05e-06
chr1	chr1	F	39	94.872	1740556	1740594	1386456	1386494	1.05e-06
chr1	chr1	P	55	87.273	582218	582272	1480649	1480702	1.05e-06
chr1	chr1	F	33	100	1744370	1744402	1520688	1520720	1.05e-06
chr1	chr1	F	39	94.872	1771114	1771152	1533763	1533801	1.05e-06
chr1	chr1	F	54	87.037	1828611	1828664	1542202	1542255	1.05e-06
chr1	chr1	F	71	83.099	1607357	1607427	1607148	1607215	1.05e-06
chr1	chr1	F	98	78.571	1608170	1608265	1607859	1607954	1.05e-06
chr1	chr1	F	36	97.222	1952116	1952151	1842878	1842913	1.05e-06
chr1	chr1	P	99	79.798	933919	934007	1846194	1846290	1.05e-06
chr1	chr1	P	39	94.872	2083988	2084026	1855751	1855789	1.05e-06
chr1	chr1	P	33	100	2033632	2033664	1890728	1890760	1.05e-06
chr1	chr1	F	52	88.462	1965917	1965966	1965493	1965544	1.05e-06
chr1	chr1	P	36	97.222	1855754	1855789	2083988	2084023	1.05e-06
chr1	chr1	F	67	83.582	1358922	1358987	17004	17068	3.79e-06
chr1	chr1	F	35	97.143	51757	51791	38688	38722	3.79e-06
chr1	chr1	P	35	97.143	2081503	2081537	51757	51791	3.79e-06
chr1	chr1	F	35	97.143	1623024	1623058	51757	51791	3.79e-06
chr1	chr1	P	35	97.143	485444	485478	51757	51791	3.79e-06
chr1	chr1	F	44	90.909	1996540	1996583	57594	57637	3.79e-06
chr1	chr1	P	35	97.143	1425555	1425589	59065	59099	3.79e-06
chr1	chr1	P	44	90.909	1689154	1689197	61367	61410	3.79e-06
chr1	chr1	P	44	90.909	793920	793963	61367	61410	3.79e-06
chr1	chr1	F	219	72.146	1037215	1037429	89383	89597	3.79e-06
chr1	chr1	P	32	100	1286527	1286558	168272	168303	3.79e-06
chr1	chr1	F	32	100	1792288	1792319	210387	210418	3.79e-06
chr1	chr1	F	101	78.218	248264	248364	247857	247952	3.79e-06
chr1	chr1	F	38	94.737	1510262	1510299	252005	252042	3.79e-06
chr1	chr1	F	38	94.737	1875295	1875332	252005	252042	3.79e-06
chr1	chr1	P	32	100	1444490	1444521	254906	254937	3.79e-06
chr1	chr1	F	66	83.333	257375	257440	257233	257297	3.79e-06
chr1	chr1	P	91	79.121	1500195	1500285	270059	270145	3.79e-06
chr1	chr1	F	57	85.965	287447	287503	286268	286323	3.79e-06
chr1	chr1	P	41	92.683	499736	499776	332601	332641	3.79e-06
chr1	chr1	P	57	85.965	604940	604996	376573	376628	3.79e-06
chr1	chr1	P	44	90.909	1750445	1750488	387079	387122	3.79e-06
chr1	chr1	F	45	91.111	1558085	1558128	451415	451459	3.79e-06
chr1	chr1	P	103	77.67	1084897	1084995	451435	451537	3.79e-06
chr1	chr1	P	95	77.895	729145	729239	452101	452195	3.79e-06
chr1	chr1	F	38	94.737	470723	470760	469510	469547	3.79e-06
chr1	chr1	P	38	94.737	51757	51794	485441	485478	3.79e-06
chr1	chr1	F	67	83.582	1358922	1358987	488581	488645	3.79e-06
chr1	chr1	F	67	83.582	1667274	1667339	488581	488645	3.79e-06
chr1	chr1	F	54	87.037	944205	944258	499555	499606	3.79e-06
chr1	chr1	F	52	88.462	1877545	1877596	499557	499605	3.79e-06
chr1	chr1	F	35	97.143	1952118	1952152	505681	505715	3.79e-06
chr1	chr1	F	35	97.143	1420737	1420771	529463	529497	3.79e-06
chr1	chr1	F	32	100	1433433	1433464	539366	539397	3.79e-06
chr1	chr1	F	32	100	2081560	2081591	539366	539397	3.79e-06
chr1	chr1	P	36	97.222	1622954	1622988	539368	539403	3.79e-06
chr1	chr1	P	32	100	2025898	2025929	542015	542046	3.79e-06
chr1	chr1	P	44	90.909	554293	554336	554293	554336	3.79e-06
chr1	chr1	P	54	87.037	376576	376628	604940	604993	3.79e-06
chr1	chr1	F	41	92.683	768567	768607	614374	614414	3.79e-06
chr1	chr1	P	35	97.143	1898501	1898535	614377	614411	3.79e-06
chr1	chr1	P	38	94.737	1842876	1842913	614379	614416	3.79e-06
chr1	chr1	F	38	94.737	1186427	1186464	615080	615117	3.79e-06
chr1	chr1	F	32	100	847231	847262	635075	635106	3.79e-06
chr1	chr1	F	98	77.551	2077302	2077399	740064	740161	3.79e-06
chr1	chr1	F	61	85.246	758601	758657	744133	744193	3.79e-06
chr1	chr1	F	44	90.909	1371325	1371368	793920	793963	3.79e-06
chr1	chr1	P	77	80.519	1491046	1491122	845275	845351	3.79e-06
chr1	chr1	P	45	91.111	1180194	1180238	854498	854540	3.79e-06
chr1	chr1	F	35	97.143	1432676	1432710	881947	881981	3.79e-06
chr1	chr1	P	117	76.923	1782830	1782944	918056	918166	3.79e-06
chr1	chr1	F	54	87.037	957349	957402	956177	956228	3.79e-06
chr1	chr1	F	79	81.013	956937	957012	956711	956788	3.79e-06
chr1	chr1	P	39	94.872	1831946	1831984	1045184	1045221	3.79e-06
chr1	chr1	F	35	97.143	1783105	1783139	1060272	1060306	3.79e-06
chr1	chr1	F	56	85.714	1160895	1160950	1085433	1085488	3.79e-06
chr1	chr1	F	81	80.247	1798959	1799037	1122282	1122362	3.79e-06
chr1	chr1	P	38	94.737	1815445	1815482	1229202	1229239	3.79e-06
chr1	chr1	F	42	92.857	1485162	1485202	1257899	1257940	3.79e-06
chr1	chr1	F	42	92.857	2109826	2109866	1257899	1257940	3.79e-06
chr1	chr1	P	38	94.737	1635605	1635642	1284342	1284379	3.79e-06
chr1	chr1	P	35	97.143	1902764	1902798	1305357	1305391	3.79e-06
chr1	chr1	P	41	92.683	1948154	1948194	1318635	1318675	3.79e-06
chr1	chr1	P	87	79.31	2049298	2049383	1347604	1347690	3.79e-06
chr1	chr1	P	74	82.432	1978089	1978161	1358919	1358987	3.79e-06
chr1	chr1	F	44	90.909	1689154	1689197	1371325	1371368	3.79e-06
chr1	chr1	P	58	86.207	1578585	1578639	1379678	1379734	3.79e-06
chr1	chr1	P	44	90.909	1839757	1839800	1387656	1387699	3.79e-06
chr1	chr1	F	44	90.909	1965937	1965980	1388648	1388691	3.79e-06
chr1	chr1	F	38	94.737	1877559	1877596	1485616	1485653	3.79e-06
chr1	chr1	F	44	90.909	1508972	1509015	1508882	1508925	3.79e-06
chr1	chr1	P	64	84.375	1379678	1379740	1578579	1578639	3.79e-06
chr1	chr1	F	128	76.562	1607826	1607948	1607411	1607531	3.79e-06
chr1	chr1	F	92	79.348	1607997	1608086	1607664	1607752	3.79e-06
chr1	chr1	F	64	84.375	1800840	1800900	1775806	1775868	3.79e-06
chr1	chr1	F	42	92.857	1778006	1778046	1777866	1777907	3.79e-06
chr1	chr1	F	60	85	2098478	2098537	1863415	1863473	3.79e-06
chr1	chr1	F	38	94.737	2110280	2110317	1877559	1877596	3.79e-06
chr1	chr1	P	38	94.737	1318638	1318675	1948154	1948191	3.79e-06
chr1	chr1	F	32	100	1960436	1960467	1960348	1960379	3.79e-06
chr1	chr1	P	71	83.099	1358922	1358987	1978089	1978158	3.79e-06
chr1	chr1	P	38	94.737	542015	542052	2025892	2025929	3.79e-06
chr1	chr1	P	38	94.737	51757	51794	2081500	2081537	3.79e-06
chr1	chr1	P	35	97.143	2130144	2130178	2130144	2130178	3.79e-06
chr1	chr2	F	13576	100	1376998	1390573	185340	198915	0
chr1	chr2	F	385	98.961	1435032	1435415	40028	40412	0
chr1	chr2	P	307	99.674	540184	540490	185433	185739	2.37e-157
chr1	chr2	P	279	98.925	1751478	1751756	36227	36505	1.88e-138
chr1	chr2	P	1565	73.035	2119970	2121508	163068	164595	8.76e-137
chr1	chr2	P	263	99.62	158033	158295	191933	192195	6.82e-133
chr1	chr2	P	225	99.111	236500	236723	59216	59440	1.52e-109
chr1	chr2	P	208	100	280079	280286	36386	36593	5.50e-104
chr1	chr2	F	1146	72.775	490284	491417	90604	91738	1.99e-98
chr1	chr2	F	935	73.583	2121242	2122164	90605	91527	1.56e-89
chr1	chr2	F	180	99.444	432341	432520	207045	207224	9.40e-87
chr1	chr2	F	298	86.913	810165	810460	84219	84503	1.57e-84
chr1	chr2	F	298	86.913	1705399	1705694	84219	84503	1.57e-84
chr1	chr2	P	214	93.458	290382	290595	85554	85762	2.63e-82
chr1	chr2	F	888	73.874	1433828	1434686	191708	192571	4.41e-80
chr1	chr2	P	176	97.159	2081421	2081596	37902	38073	9.54e-77
chr1	chr2	P	176	96.591	994076	994251	92751	92925	1.23e-75
chr1	chr2	P	147	100	2126842	2126988	92913	93059	4.47e-70
chr1	chr2	P	146	99.315	1722450	1722595	192595	192740	7.48e-68
chr1	chr2	F	503	76.143	394287	394781	91263	91759	5.82e-64
chr1	chr2	P	162	93.827	922410	922571	126408	126569	9.74e-62
chr1	chr2	F	190	89.474	480203	480390	182582	182761	2.73e-57
chr1	chr2	P	311	80.064	490254	490562	163056	163364	9.81e-57
chr1	chr2	P	175	90.857	1433290	1433463	37908	38073	3.53e-56
chr1	chr2	P	121	100	1623018	1623138	182641	182761	1.27e-55
chr1	chr2	P	121	100	38682	38802	182641	182761	1.27e-55
chr1	chr2	P	341	78.592	222370	222704	36427	36765	5.91e-54
chr1	chr2	P	113	100	2081431	2081543	39458	39570	3.55e-51
chr1	chr2	F	118	98.305	1045874	1045990	15339	15456	4.60e-50
chr1	chr2	P	190	87.368	1137745	1137929	208750	208929	1.65e-49
chr1	chr2	F	111	99.099	1056833	1056943	36427	36537	2.14e-48
chr1	chr2	P	476	75.21	221625	222085	37036	37493	9.95e-47
chr1	chr2	P	113	97.345	790710	790821	79618	79730	1.29e-45
chr1	chr2	F	111	97.297	2083205	2083313	222068	222178	1.67e-44
chr1	chr2	P	100	100	1889864	1889963	83520	83619	5.99e-44
chr1	chr2	P	157	89.172	485368	485518	39423	39570	7.75e-43
chr1	chr2	P	163	87.117	951815	951974	9838	9995	1.00e-41
chr1	chr2	F	280	78.571	455696	455971	17198	17474	1.00e-41
chr1	chr2	P	124	92.742	387745	387866	214019	214142	1.00e-41
chr1	chr2	P	132	91.667	485353	485484	37955	38078	3.60e-41
chr1	chr2	F	99	97.98	820551	820649	220618	220716	4.66e-40
chr1	chr2	P	161	86.957	38799	38956	182576	182726	6.03e-39
chr1	chr2	F	90	100	485395	485484	182672	182761	2.17e-38
chr1	chr2	P	153	86.275	152426	152577	185590	185739	2.81e-37
chr1	chr2	F	282	77.305	1432894	1433172	191401	191681	2.81e-37
chr1	chr2	P	126	90.476	480265	480390	37955	38072	3.63e-36
chr1	chr2	P	146	86.986	480253	480393	39455	39591	6.07e-34
chr1	chr2	P	88	97.727	1978066	1978153	39504	39591	6.07e-34
chr1	chr2	P	93	95.699	1158169	1158261	65496	65588	2.18e-33
chr1	chr2	F	95	94.737	1433327	1433421	182672	182766	7.86e-33
chr1	chr2	P	107	91.589	1584563	1584669	175343	175445	1.02e-31
chr1	chr2	P	142	85.211	1316692	1316833	68155	68290	1.31e-30
chr1	chr2	F	162	83.951	1628079	1628240	182634	182780	1.31e-30
chr1	chr2	F	75	100	738615	738689	182360	182434	4.73e-30
chr1	chr2	P	88	95.455	471158	471244	182511	182598	4.73e-30
chr1	chr2	P	88	95.455	1781725	1781812	190136	190222	4.73e-30
chr1	chr2	F	77	98.701	1158176	1158252	35676	35752	1.70e-29
chr1	chr2	F	89	94.382	1308877	1308965	65496	65584	1.70e-29
chr1	chr2	P	79	97.468	104001	104078	79941	80019	2.20e-28
chr1	chr2	F	151	83.444	38660	38802	39436	39584	7.91e-28
chr1	chr2	F	151	83.444	1622996	1623138	39436	39584	7.91e-28
chr1	chr2	F	88	94.318	1623166	1623249	39516	39603	7.91e-28
chr1	chr2	F	258	76.744	1204451	1204703	209964	210212	7.91e-28
chr1	chr2	P	77	97.403	1628098	1628174	126296	126371	2.85e-27
chr1	chr2	F	72	98.611	1963580	1963651	67794	67865	1.02e-26
chr1	chr2	P	76	97.368	850166	850241	126296	126370	1.02e-26
chr1	chr2	F	69	100	1208036	1208104	149755	149823	1.02e-26
chr1	chr2	P	199	80.402	1831710	1831900	156257	156437	1.02e-26
chr1	chr2	P	75	97.333	843548	843622	36153	36226	3.68e-26
chr1	chr2	F	96	90.625	1623146	1623239	126300	126394	1.32e-25
chr1	chr2	F	89	92.135	1387166	1387253	144796	144883	1.32e-25
chr1	chr2	F	79	94.937	341074	341152	165672	165750	1.32e-25
chr1	chr2	F	73	97.26	38810	38882	126300	126371	4.76e-25
chr1	chr2	P	73	97.26	1433298	1433370	126300	126371	4.76e-25
chr1	chr2	P	73	97.26	485366	485438	126300	126371	4.76e-25
chr1	chr2	P	73	97.26	480272	480344	126300	126371	4.76e-25
chr1	chr2	P	77	94.805	1308886	1308962	35676	35752	1.71e-24
chr1	chr2	P	65	100	1623166	1623230	188003	188067	1.71e-24
chr1	chr2	P	112	86.607	206636	206746	219555	219664	1.71e-24
chr1	chr2	P	64	100	732464	732527	116014	116077	6.16e-24
chr1	chr2	F	76	94.737	472264	472339	170448	170523	6.16e-24
chr1	chr2	P	76	94.737	41288	41363	170448	170523	6.16e-24
chr1	chr2	P	64	100	1603106	1603169	219559	219622	6.16e-24
chr1	chr2	P	148	81.081	726716	726862	87371	87518	2.22e-23
chr1	chr2	P	72	95.833	842599	842670	126296	126367	2.22e-23
chr1	chr2	F	65	98.462	1372266	1372330	36154	36218	7.97e-23
chr1	chr2	P	103	88.35	1623135	1623237	182634	182726	7.97e-23
chr1	chr2	P	74	94.595	1766314	1766387	207296	207369	7.97e-23
chr1	chr2	F	74	94.595	427242	427315	207296	207369	7.97e-23
chr1	chr2	P	67	97.015	488581	488647	36152	36218	2.87e-22
chr1	chr2	P	71	95.775	1045190	1045259	39990	40060	2.87e-22
chr1	chr2	P	61	100	1320893	1320953	67794	67854	2.87e-22
chr1	chr2	P	61	100	2025371	2025431	182655	182715	2.87e-22
chr1	chr2	F	120	85	38615	38734	37899	38007	1.03e-21
chr1	chr2	P	137	83.212	1628091	1628226	37950	38072	1.03e-21
chr1	chr2	F	60	100	38830	38889	38013	38072	1.03e-21
chr1	chr2	F	151	80.795	2034153	2034301	66281	66426	1.03e-21
chr1	chr2	F	69	95.652	32239	32307	180352	180420	1.03e-21
chr1	chr2	F	91	89.011	276989	277079	219555	219644	1.03e-21
chr1	chr2	P	185	77.838	188222	188401	39769	39952	3.71e-21
chr1	chr2	F	479	71.816	873882	874341	90780	91247	3.71e-21
chr1	chr2	P	117	84.615	1818305	1818413	156257	156373	3.71e-21
chr1	chr2	P	59	100	2089121	2089179	182657	182715	3.71e-21
chr1	chr2	F	59	100	497688	497746	182657	182715	3.71e-21
chr1	chr2	P	59	100	213903	213961	182657	182715	3.71e-21
chr1	chr2	F	59	100	2115430	2115488	182657	182715	3.71e-21
chr1	chr2	F	59	100	2119037	2119095	182657	182715	3.71e-21
chr1	chr2	P	188	77.66	267845	268032	194779	194960	3.71e-21
chr1	chr2	F	61	98.361	1622956	1623016	39424	39484	1.33e-20
chr1	chr2	P	122	84.426	1433300	1433416	39458	39570	1.33e-20
chr1	chr2	P	67	95.522	732614	732680	117063	117129	1.33e-20
chr1	chr2	F	74	93.243	452647	452720	126296	126368	1.33e-20
chr1	chr2	P	120	84.167	267732	267841	195007	195126	1.33e-20
chr1	chr2	F	296	73.649	1620177	1620467	22433	22724	4.80e-20
chr1	chr2	F	57	100	1433648	1433704	37696	37752	4.80e-20
chr1	chr2	P	81	90.123	1379664	1379744	37994	38074	4.80e-20
chr1	chr2	F	61	98.361	38621	38680	39424	39484	4.80e-20
chr1	chr2	P	86	89.535	1628069	1628150	39516	39601	4.80e-20
chr1	chr2	P	153	80.392	1678199	1678349	82064	82206	4.80e-20
chr1	chr2	P	88	88.636	1379661	1379744	39497	39584	1.73e-19
chr1	chr2	F	94	87.234	78092	78184	185649	185739	1.73e-19
chr1	chr2	F	70	94.286	2115429	2115495	186651	186720	1.73e-19
chr1	chr2	F	79	91.139	1978073	1978151	188003	188077	1.73e-19
chr1	chr2	P	59	98.305	1152995	1153053	214131	214189	1.73e-19
chr1	chr2	F	96	87.5	2081462	2081548	182672	182766	6.21e-19
chr1	chr2	P	69	94.203	213899	213964	186649	186717	6.21e-19
chr1	chr2	F	111	84.685	1622960	1623070	37908	38007	2.23e-18
chr1	chr2	F	64	95.312	17009	17071	38001	38064	2.23e-18
chr1	chr2	P	54	100	1628175	1628228	116010	116063	2.23e-18
chr1	chr2	F	54	100	699444	699497	147112	147165	2.23e-18
chr1	chr2	P	71	92.958	2025367	2025433	186647	186717	2.23e-18
chr1	chr2	P	69	92.754	17001	17068	36154	36222	8.03e-18
chr1	chr2	F	66	93.939	488586	488650	38001	38066	8.03e-18
chr1	chr2	F	62	95.161	1623166	1623227	38013	38074	8.03e-18
chr1	chr2	F	76	90.789	38830	38901	39516	39591	8.03e-18
chr1	chr2	F	65	93.846	1372201	1372265	58827	58891	8.03e-18
chr1	chr2	F	89	86.517	1352782	1352870	66290	66378	8.03e-18
chr1	chr2	P	53	100	2115442	2115494	126294	126346	8.03e-18
chr1	chr2	P	209	75.598	1864351	1864559	163158	163361	8.03e-18
chr1	chr2	P	63	95.238	310549	310611	182760	182821	8.03e-18
chr1	chr2	P	67	94.03	2089117	2089180	186651	186717	8.03e-18
chr1	chr2	F	67	94.03	497687	497750	186651	186717	8.03e-18
chr1	chr2	F	67	94.03	2119036	2119099	186651	186717	8.03e-18
chr1	chr2	F	60	96.667	850186	850245	186663	186721	8.03e-18
chr1	chr2	F	65	93.846	480260	480324	188003	188067	8.03e-18
chr1	chr2	F	65	93.846	1628086	1628150	188003	188067	8.03e-18
chr1	chr2	P	65	93.846	38830	38894	188003	188067	8.03e-18
chr1	chr2	F	62	95.161	485357	485418	188006	188067	8.03e-18
chr1	chr2	P	52	100	850166	850217	38013	38064	2.89e-17
chr1	chr2	F	62	95.161	1603258	1603319	40000	40060	2.89e-17
chr1	chr2	F	52	100	851822	851873	100151	100202	2.89e-17
chr1	chr2	F	52	100	520255	520306	141383	141434	2.89e-17
chr1	chr2	F	56	98.214	1628119	1628174	186663	186717	2.89e-17
chr1	chr2	F	61	95.082	1433290	1433350	188007	188067	2.89e-17
chr1	chr2	P	64	93.75	1372263	1372325	38001	38064	1.04e-16
chr1	chr2	F	51	100	206809	206859	38013	38063	1.04e-16
chr1	chr2	P	51	100	276876	276926	38013	38063	1.04e-16
chr1	chr2	P	63	93.651	17069	17131	58829	58891	1.04e-16
chr1	chr2	F	154	79.221	1796911	1797062	82064	82206	1.04e-16
chr1	chr2	P	127	80.315	726853	726979	87224	87348	1.04e-16
chr1	chr2	F	54	98.148	2025364	2025417	126293	126346	1.04e-16
chr1	chr2	P	51	100	2119049	2119099	126296	126346	1.04e-16
chr1	chr2	F	51	100	213899	213949	126296	126346	1.04e-16
chr1	chr2	P	51	100	497700	497750	126296	126346	1.04e-16
chr1	chr2	F	51	100	2089117	2089167	126296	126346	1.04e-16
chr1	chr2	F	51	100	17021	17071	126320	126370	1.04e-16
chr1	chr2	P	51	100	1372263	1372313	126320	126370	1.04e-16
chr1	chr2	P	61	95.082	17011	17070	188017	188077	1.04e-16
chr1	chr2	F	51	100	276876	276926	188017	188067	1.04e-16
chr1	chr2	F	51	100	850167	850217	188017	188067	1.04e-16
chr1	chr2	P	51	100	206809	206859	188017	188067	1.04e-16
chr1	chr2	P	59	94.915	479961	480019	39608	39666	3.73e-16
chr1	chr2	P	53	98.113	542776	542828	65437	65489	3.73e-16
chr1	chr2	P	50	100	1378328	1378377	126294	126343	3.73e-16
chr1	chr2	P	58	94.828	524219	524276	48858	48915	1.34e-15
chr1	chr2	F	49	100	1760349	1760397	63770	63818	1.34e-15
chr1	chr2	F	79	87.342	1830390	1830468	82128	82206	1.34e-15
chr1	chr2	F	289	73.356	1864275	1864560	90507	90781	1.34e-15
chr1	chr2	F	86	87.209	206776	206859	126289	126369	1.34e-15
chr1	chr2	P	86	87.209	276876	276959	126289	126369	1.34e-15
chr1	chr2	F	56	96.429	488598	488652	126320	126375	1.34e-15
chr1	chr2	F	55	96.364	842616	842670	186663	186717	1.34e-15
chr1	chr2	P	59	94.915	488588	488645	188019	188077	1.34e-15
chr1	chr2	P	77	88.312	513386	513462	201713	201788	1.34e-15
chr1	chr2	F	61	93.443	843562	843621	38001	38061	4.83e-15
chr1	chr2	P	175	76.571	1218216	1218384	90791	90964	4.83e-15
chr1	chr2	F	48	100	843574	843621	126320	126367	4.83e-15
chr1	chr2	F	54	96.296	39514	39567	166955	167008	4.83e-15
chr1	chr2	F	62	93.548	1378310	1378371	182657	182715	4.83e-15
chr1	chr2	P	62	93.548	1623064	1623122	186652	186713	4.83e-15
chr1	chr2	P	62	93.548	38728	38786	186652	186713	4.83e-15
chr1	chr2	F	52	98.077	480293	480344	186663	186713	4.83e-15
chr1	chr2	F	52	98.077	485387	485438	186663	186713	4.83e-15
chr1	chr2	P	52	98.077	1623146	1623197	186663	186713	4.83e-15
chr1	chr2	F	52	98.077	1433319	1433370	186663	186713	4.83e-15
chr1	chr2	P	52	98.077	38810	38861	186663	186713	4.83e-15
chr1	chr2	P	48	100	452647	452694	186670	186717	4.83e-15
chr1	chr2	P	57	94.737	16293	16349	187244	187300	4.83e-15
chr1	chr2	F	48	100	214030	214077	187959	188006	4.83e-15
chr1	chr2	F	61	93.443	1372264	1372323	188017	188077	4.83e-15
chr1	chr2	P	50	98	58378	58427	12275	12324	1.74e-14
chr1	chr2	P	64	92.188	1213431	1213491	36155	36217	1.74e-14
chr1	chr2	P	67	91.045	1978087	1978153	38001	38063	1.74e-14
chr1	chr2	F	47	100	758208	758254	38021	38067	1.74e-14
chr1	chr2	F	211	75.355	803970	804177	66281	66478	1.74e-14
chr1	chr2	F	211	75.355	1699204	1699411	66281	66478	1.74e-14
chr1	chr2	P	50	98	1865157	1865206	85293	85342	1.74e-14
chr1	chr2	F	47	100	38728	38774	126300	126346	1.74e-14
chr1	chr2	F	47	100	1623064	1623110	126300	126346	1.74e-14
chr1	chr2	F	71	90.141	1336047	1336112	159356	159426	1.74e-14
chr1	chr2	P	47	100	452651	452697	182669	182715	1.74e-14
chr1	chr2	P	81	86.42	488027	488106	184767	184846	1.74e-14
chr1	chr2	F	77	88.312	575518	575593	36148	36218	6.25e-14
chr1	chr2	F	73	89.041	1978086	1978158	36151	36218	6.25e-14
chr1	chr2	F	97	82.474	1380085	1380181	39179	39275	6.25e-14
chr1	chr2	F	105	82.857	128378	128478	82108	82206	6.25e-14
chr1	chr2	P	56	94.643	1379670	1379725	126320	126374	6.25e-14
chr1	chr2	F	64	90.625	1627978	1628041	182561	182624	6.25e-14
chr1	chr2	F	59	93.22	264946	265003	182735	182793	6.25e-14
chr1	chr2	P	55	94.545	9775	9829	182735	182789	6.25e-14
chr1	chr2	F	75	88	2081421	2081495	188007	188077	6.25e-14
chr1	chr2	P	59	93.22	843564	843621	188019	188077	6.25e-14
chr1	chr2	P	76	88.158	1765815	1765887	201239	201312	6.25e-14
chr1	chr2	P	74	87.838	220557	220627	182511	182584	2.25e-13
chr1	chr2	F	69	88.406	1319475	1319543	231781	231849	2.25e-13
chr1	chr2	P	118	79.661	288249	288364	71971	72087	8.08e-13
chr1	chr2	P	51	96.078	38957	39006	182366	182416	8.08e-13
chr1	chr2	F	44	100	842623	842666	182672	182715	8.08e-13
chr1	chr2	F	44	100	850194	850237	182672	182715	8.08e-13
chr1	chr2	P	50	96	638873	638922	221403	221452	8.08e-13
chr1	chr2	F	50	96	995901	995949	36106	36155	2.91e-12
chr1	chr2	F	62	90.323	1379674	1379735	36151	36211	2.91e-12
chr1	chr2	F	67	89.552	17009	17070	39504	39570	2.91e-12
chr1	chr2	P	46	97.826	961734	961779	39615	39660	2.91e-12
chr1	chr2	P	46	97.826	1433376	1433421	116012	116057	2.91e-12
chr1	chr2	P	79	84.81	1446883	1446961	158039	158117	2.91e-12
chr1	chr2	F	49	95.918	1978052	1978100	182620	182668	2.91e-12
chr1	chr2	P	43	100	758208	758250	188017	188059	2.91e-12
chr1	chr2	P	46	97.826	978146	978191	226261	226306	2.91e-12
chr1	chr2	P	42	100	450735	450776	39008	39049	1.05e-11
chr1	chr2	F	83	84.337	320138	320220	48844	48922	1.05e-11
chr1	chr2	F	48	95.833	2033049	2033096	68931	68978	1.05e-11
chr1	chr2	P	79	84.81	505778	505856	69001	69078	1.05e-11
chr1	chr2	F	124	79.839	79165	79277	83890	84010	1.05e-11
chr1	chr2	P	45	97.778	308999	309043	182396	182440	1.05e-11
chr1	chr2	F	65	89.231	488586	488645	39504	39568	3.76e-11
chr1	chr2	F	55	92.727	206809	206859	39516	39570	3.76e-11
chr1	chr2	P	55	92.727	850167	850217	39516	39570	3.76e-11
chr1	chr2	P	55	92.727	276876	276926	39516	39570	3.76e-11
chr1	chr2	F	47	95.745	547693	547739	39990	40036	3.76e-11
chr1	chr2	P	120	78.333	1976781	1976900	91469	91587	3.76e-11
chr1	chr2	F	74	85.135	220528	220601	116004	116077	3.76e-11
chr1	chr2	P	44	97.727	1434943	1434986	156257	156300	3.76e-11
chr1	chr2	F	89	82.022	1218387	1218475	163161	163249	3.76e-11
chr1	chr2	F	50	94	1465099	1465148	192624	192673	3.76e-11
chr1	chr2	P	44	97.727	208268	208311	220474	220517	3.76e-11
chr1	chr2	P	47	95.745	1445932	1445977	10316	10362	1.35e-10
chr1	chr2	F	90	83.333	31034	31116	36268	36354	1.35e-10
chr1	chr2	F	60	90	1213435	1213491	38001	38060	1.35e-10
chr1	chr2	P	67	88.06	1372264	1372325	39504	39570	1.35e-10
chr1	chr2	F	40	100	134974	135013	59260	59299	1.35e-10
chr1	chr2	F	76	84.211	1757138	1757213	64162	64237	1.35e-10
chr1	chr2	P	84	83.333	1502308	1502389	82125	82206	1.35e-10
chr1	chr2	P	139	78.417	1931277	1931399	100199	100336	1.35e-10
chr1	chr2	P	64	87.5	1579843	1579906	170765	170828	1.35e-10
chr1	chr2	F	46	95.652	1628030	1628075	182500	182545	1.35e-10
chr1	chr2	F	43	97.674	1335478	1335520	200080	200122	1.35e-10
chr1	chr2	F	316	71.519	1619568	1619876	21815	22124	4.87e-10
chr1	chr2	P	52	92.308	1623166	1623217	36151	36201	4.87e-10
chr1	chr2	F	49	93.878	276878	276926	36154	36201	4.87e-10
chr1	chr2	F	49	93.878	480276	480324	36154	36201	4.87e-10
chr1	chr2	F	49	93.878	485370	485418	36154	36201	4.87e-10
chr1	chr2	F	49	93.878	850169	850217	36154	36201	4.87e-10
chr1	chr2	F	49	93.878	1433302	1433350	36154	36201	4.87e-10
chr1	chr2	F	49	93.878	1628102	1628150	36154	36201	4.87e-10
chr1	chr2	P	49	93.878	206809	206857	36154	36201	4.87e-10
chr1	chr2	P	49	93.878	38830	38878	36154	36201	4.87e-10
chr1	chr2	P	49	93.878	842599	842646	38013	38061	4.87e-10
chr1	chr2	P	49	93.878	575524	575571	126320	126367	4.87e-10
chr1	chr2	P	39	100	1048252	1048290	147679	147717	4.87e-10
chr1	chr2	P	157	75.159	1037598	1037753	177826	177981	4.87e-10
chr1	chr2	P	51	92.157	1667297	1667347	188011	188061	4.87e-10
chr1	chr2	F	49	93.878	842599	842646	188019	188067	4.87e-10
chr1	chr2	P	116	78.448	1031911	1032022	196592	196707	4.87e-10
chr1	chr2	F	68	86.765	1937548	1937612	215496	215563	4.87e-10
chr1	chr2	F	80	83.75	586272	586348	221793	221872	4.87e-10
chr1	chr2	P	147	75.51	492616	492761	31840	31985	1.75e-09
chr1	chr2	F	38	100	102340	102377	37240	37277	1.75e-09
chr1	chr2	F	63	87.302	1667279	1667340	38001	38062	1.75e-09
chr1	chr2	F	65	87.692	843562	843621	39504	39568	1.75e-09
chr1	chr2	P	65	86.154	505778	505842	66742	66806	1.75e-09
chr1	chr2	F	77	84.416	133613	133689	75246	75317	1.75e-09
chr1	chr2	P	53	90.566	219035	219087	108583	108635	1.75e-09
chr1	chr2	F	45	95.556	758208	758252	126328	126371	1.75e-09
chr1	chr2	P	148	77.703	1336447	1336577	159555	159697	1.75e-09
chr1	chr2	P	66	86.364	2032724	2032789	170444	170507	1.75e-09
chr1	chr2	F	54	90.741	1462411	1462463	182740	182793	1.75e-09
chr1	chr2	P	54	90.741	131370	131422	182740	182793	1.75e-09
chr1	chr2	P	51	92.157	581717	581767	182858	182907	1.75e-09
chr1	chr2	P	58	89.655	1213437	1213491	188020	188077	1.75e-09
chr1	chr2	P	38	100	977910	977947	224728	224765	1.75e-09
chr1	chr2	F	65	86.154	1073343	1073406	10580	10643	6.29e-09
chr1	chr2	P	52	90.385	395395	395446	32458	32509	6.29e-09
chr1	chr2	P	130	76.154	394712	394841	33049	33178	6.29e-09
chr1	chr2	F	49	91.837	842598	842646	36153	36201	6.29e-09
chr1	chr2	F	56	89.286	1876976	1877029	36168	36223	6.29e-09
chr1	chr2	F	62	87.097	1358927	1358987	38001	38061	6.29e-09
chr1	chr2	F	70	84.286	880810	880879	58730	58799	6.29e-09
chr1	chr2	F	94	81.915	553704	553785	101371	101464	6.29e-09
chr1	chr2	P	89	80.899	873856	873944	163096	163183	6.29e-09
chr1	chr2	F	37	100	474077	474113	185442	185478	6.29e-09
chr1	chr2	P	43	95.349	1358945	1358987	188019	188061	6.29e-09
chr1	chr2	P	49	91.837	2619	2667	203972	204020	6.29e-09
chr1	chr2	F	55	89.091	523390	523444	224324	224378	6.29e-09
chr1	chr2	P	46	93.478	1250710	1250755	231555	231600	6.29e-09
chr1	chr2	F	46	93.478	1548612	1548657	235557	235602	6.29e-09
chr1	chr2	P	72	84.722	1458066	1458131	21404	21475	2.26e-08
chr1	chr2	P	74	83.784	1358922	1358993	36147	36218	2.26e-08
chr1	chr2	P	49	91.837	887335	887382	36153	36200	2.26e-08
chr1	chr2	F	63	87.302	1835017	1835074	36157	36218	2.26e-08
chr1	chr2	P	42	95.238	1555405	1555446	38021	38062	2.26e-08
chr1	chr2	F	54	88.889	9808	9861	39435	39488	2.26e-08
chr1	chr2	P	42	95.238	1015067	1015108	102526	102567	2.26e-08
chr1	chr2	P	43	95.349	788181	788223	122815	122856	2.26e-08
chr1	chr2	P	60	88.333	1978082	1978141	126320	126374	2.26e-08
chr1	chr2	P	57	89.474	2081429	2081485	126320	126371	2.26e-08
chr1	chr2	F	59	88.136	441347	441402	143852	143910	2.26e-08
chr1	chr2	F	42	95.238	1641754	1641795	182629	182670	2.26e-08
chr1	chr2	F	42	95.238	1555405	1555446	188018	188059	2.26e-08
chr1	chr2	F	36	100	432312	432347	219077	219112	2.26e-08
chr1	chr2	P	48	91.667	1082867	1082914	231179	231226	2.26e-08
chr1	chr2	P	38	97.368	61063	61100	12033	12070	8.14e-08
chr1	chr2	P	67	85.075	1667274	1667339	36154	36218	8.14e-08
chr1	chr2	F	65	86.154	2081433	2081497	36154	36213	8.14e-08
chr1	chr2	F	69	84.058	134838	134905	81745	81813	8.14e-08
chr1	chr2	F	48	91.667	887335	887381	126321	126367	8.14e-08
chr1	chr2	F	56	89.286	760464	760519	147988	148038	8.14e-08
chr1	chr2	P	107	77.57	1037401	1037507	178083	178189	8.14e-08
chr1	chr2	F	51	90.196	1376935	1376985	220058	220106	8.14e-08
chr1	chr2	P	34	100	1286791	1286824	8594	8627	2.93e-07
chr1	chr2	P	73	82.192	260329	260401	35680	35752	2.93e-07
chr1	chr2	F	40	95	102075	102114	36870	36909	2.93e-07
chr1	chr2	F	52	88.462	220530	220581	37944	37995	2.93e-07
chr1	chr2	F	37	97.297	184272	184308	38931	38967	2.93e-07
chr1	chr2	F	50	90	208569	208618	116030	116077	2.93e-07
chr1	chr2	F	48	91.667	1213447	1213491	126320	126366	2.93e-07
chr1	chr2	F	57	87.719	1336110	1336162	159504	159560	2.93e-07
chr1	chr2	P	38	97.368	268774	268810	182393	182430	2.93e-07
chr1	chr2	P	37	97.297	1638543	1638579	185649	185685	2.93e-07
chr1	chr2	F	61	85.246	1434872	1434932	192716	192776	2.93e-07
chr1	chr2	P	55	87.273	2086144	2086198	201734	201788	2.93e-07
chr1	chr2	F	39	94.872	966108	966146	4912	4950	1.05e-06
chr1	chr2	F	56	87.5	1181294	1181349	5289	5340	1.05e-06
chr1	chr2	P	42	92.857	951724	951765	10025	10066	1.05e-06
chr1	chr2	F	239	71.967	593912	594145	31664	31897	1.05e-06
chr1	chr2	P	49	89.796	452671	452719	36154	36201	1.05e-06
chr1	chr2	P	50	90	575524	575571	38013	38061	1.05e-06
chr1	chr2	F	47	91.489	758208	758250	39524	39570	1.05e-06
chr1	chr2	F	75	81.333	260327	260401	65503	65577	1.05e-06
chr1	chr2	P	46	91.304	974055	974099	72150	72195	1.05e-06
chr1	chr2	P	59	86.441	1150439	1150494	143852	143910	1.05e-06
chr1	chr2	P	58	86.207	1831566	1831622	156549	156606	1.05e-06
chr1	chr2	P	45	91.111	1478217	1478261	160234	160278	1.05e-06
chr1	chr2	P	51	88.235	314263	314313	166813	166863	1.05e-06
chr1	chr2	P	42	92.857	2031212	2031253	170179	170220	1.05e-06
chr1	chr2	F	64	85.938	276895	276956	186663	186721	1.05e-06
chr1	chr2	P	64	85.938	206779	206840	186663	186721	1.05e-06
chr1	chr2	F	50	90	575524	575571	188019	188067	1.05e-06
chr1	chr2	F	51	88.235	1432750	1432800	191305	191355	1.05e-06
chr1	chr2	F	39	94.872	1740556	1740594	194798	194836	1.05e-06
chr1	chr2	P	49	89.796	1754954	1755002	199938	199984	1.05e-06
chr1	chr2	P	70	82.857	757478	757546	200952	201021	1.05e-06
chr1	chr2	P	78	82.051	1383024	1383096	206346	206423	1.05e-06
chr1	chr2	F	35	97.143	2082396	2082430	15339	15373	3.79e-06
chr1	chr2	P	35	97.143	2025771	2025805	21574	21608	3.79e-06
chr1	chr2	F	39	94.872	1889874	1889911	30234	30272	3.79e-06
chr1	chr2	P	50	88	384309	384358	37185	37234	3.79e-06
chr1	chr2	F	32	100	220546	220577	37915	37946	3.79e-06
chr1	chr2	F	35	97.143	51757	51791	37961	37995	3.79e-06
chr1	chr2	P	32	100	1433435	1433466	39425	39456	3.79e-06
chr1	chr2	F	35	97.143	51757	51791	39464	39498	3.79e-06
chr1	chr2	P	35	97.143	1641759	1641793	39557	39591	3.79e-06
chr1	chr2	F	35	97.143	2033955	2033989	68952	68986	3.79e-06
chr1	chr2	P	106	77.358	288258	288360	71903	72008	3.79e-06
chr1	chr2	F	112	76.786	1351823	1351932	76850	76959	3.79e-06
chr1	chr2	F	32	100	104063	104094	79915	79946	3.79e-06
chr1	chr2	F	167	74.251	2120384	2120546	89751	89910	3.79e-06
chr1	chr2	F	32	100	141137	141168	106089	106120	3.79e-06
chr1	chr2	F	46	91.304	864930	864973	116281	116325	3.79e-06
chr1	chr2	F	72	81.944	1299044	1299114	132572	132642	3.79e-06
chr1	chr2	P	32	100	611188	611219	138589	138620	3.79e-06
chr1	chr2	P	39	94.872	1512095	1512133	147509	147546	3.79e-06
chr1	chr2	P	32	100	1634878	1634909	148431	148462	3.79e-06
chr1	chr2	P	153	73.856	105007	105158	163629	163780	3.79e-06
chr1	chr2	F	36	97.222	1433262	1433296	182510	182545	3.79e-06
chr1	chr2	F	47	89.362	732481	732527	182718	182764	3.79e-06
chr1	chr2	P	38	94.737	51757	51794	182718	182755	3.79e-06
chr1	chr2	P	58	86.207	1578585	1578639	188020	188076	3.79e-06
chr1	chr2	P	44	90.909	1839757	1839800	195998	196041	3.79e-06
chr1	chr2	F	44	90.909	1965937	1965980	196990	197033	3.79e-06
chr1	chr2	P	50	88	1837540	1837589	231665	231714	3.79e-06
chr2	chr2	P	721	73.509	91692	92406	32475	33176	2.31e-64
chr2	chr2	P	719	73.574	32478	33176	91692	92403	2.31e-64
chr2	chr2	F	113	96.46	39458	39570	37955	38063	2.38e-44
chr2	chr2	P	680	71.765	163631	164302	89637	90309	1.11e-42
chr2	chr2	P	176	81.25	182634	182798	39418	39591	3.14e-28
chr2	chr2	P	77	96.104	65505	65581	35676	35752	4.06e-27
chr2	chr2	P	80	95	35676	35755	65502	65581	4.06e-27
chr2	chr2	F	89	92.135	195508	195595	144796	144883	1.46e-26
chr2	chr2	F	116	84.483	71987	72101	71917	72032	3.16e-23
chr2	chr2	P	81	90.123	188006	188086	37994	38074	5.30e-21
chr2	chr2	P	72	93.056	38003	38074	188006	188077	5.30e-21
chr2	chr2	P	88	88.636	188003	188086	39497	39584	1.90e-20
chr2	chr2	P	79	91.139	39506	39584	188003	188077	1.90e-20
chr2	chr2	P	58	98.276	182709	182766	37950	38007	6.85e-20
chr2	chr2	P	96	87.5	37950	38036	182672	182766	6.85e-20
chr2	chr2	F	104	84.615	35554	35653	35406	35508	8.86e-19
chr2	chr2	F	68	92.647	173552	173619	170380	170446	3.19e-18
chr2	chr2	P	50	100	186670	186719	126294	126343	4.12e-17
chr2	chr2	F	106	83.962	131742	131839	130228	130329	1.48e-16
chr2	chr2	F	106	82.075	130798	130903	130389	130494	1.48e-16
chr2	chr2	F	62	93.548	186652	186713	182657	182715	5.33e-16
chr2	chr2	P	47	100	182669	182715	126300	126346	1.92e-15
chr2	chr2	P	50	98	126300	126349	182666	182715	1.92e-15
chr2	chr2	F	53	96.226	126320	126371	38013	38065	6.90e-15
chr2	chr2	F	97	82.474	188427	188523	39179	39275	6.90e-15
chr2	chr2	P	56	94.643	188012	188067	126320	126374	6.90e-15
chr2	chr2	P	61	91.803	38001	38061	36154	36213	2.48e-14
chr2	chr2	P	48	97.917	126320	126367	36154	36201	2.48e-14
chr2	chr2	P	288	72.222	163056	163340	90597	90882	2.48e-14
chr2	chr2	F	62	90.323	188016	188077	36151	36211	3.21e-13
chr2	chr2	F	98	81.633	7501	7596	6498	6589	1.49e-11
chr2	chr2	F	106	80.189	231380	231483	231243	231344	1.49e-11
chr2	chr2	F	44	95.455	92473	92516	61276	61319	1.93e-10
chr2	chr2	F	80	83.75	126320	126394	39516	39593	6.95e-10
chr2	chr2	P	92	80.435	232081	232170	68339	68430	6.95e-10
chr2	chr2	P	83	81.928	68348	68430	232081	232161	6.95e-10
chr2	chr2	F	70	84.286	68906	68975	66634	66701	2.50e-09
chr2	chr2	P	48	91.667	182721	182768	116010	116057	2.50e-09
chr2	chr2	P	51	90.196	116010	116060	182718	182768	2.50e-09
chr2	chr2	F	156	75	27838	27989	27242	27394	8.99e-09
chr2	chr2	P	68	85.294	39504	39571	36151	36213	8.99e-09
chr2	chr2	P	65	86.154	36154	36213	39504	39568	8.99e-09
chr2	chr2	F	36	97.222	140323	140358	140283	140318	1.16e-07
chr2	chr2	P	42	92.857	220841	220882	148166	148207	1.16e-07
chr2	chr2	P	78	82.051	206346	206423	191366	191438	1.16e-07
chr2	chr2	P	48	89.583	148166	148213	220835	220882	1.16e-07
chr2	chr2	P	39	94.872	83572	83609	30234	30272	4.18e-07
chr2	chr2	F	46	89.13	116012	116057	37950	37995	1.50e-06
chr2	chr2	P	56	85.714	207201	207255	67070	67124	1.50e-06
chr2	chr2	P	52	86.538	206821	206872	67443	67494	1.50e-06
chr2	chr2	F	52	86.538	166277	166328	83467	83518	1.50e-06
chr2	chr2	F	70	81.429	188705	188773	39778	39846	5.41e-06
chr2	chr1	P	276	99.275	36230	36505	1751478	1751753	2.08e-139
chr2	chr1	P	1659	72.694	163068	164688	2119877	2121508	9.67e-138
chr2	chr1	P	179	96.089	92751	92928	994073	994251	1.36e-76
chr2	chr1	P	283	81.272	163083	163364	490254	490535	1.08e-57
chr2	chr1	P	363	77.961	36427	36786	222349	222704	6.52e-55
chr2	chr1	P	122	97.541	39458	39579	2081422	2081543	3.92e-52
chr2	chr1	P	166	87.952	39423	39579	485359	485518	8.55e-44
chr2	chr1	P	155	87.742	182582	182726	38799	38950	6.66e-40
chr2	chr1	P	104	92.308	175346	175445	1584563	1584666	1.12e-32
chr2	chr1	P	78	96.154	36153	36229	843545	843622	4.06e-27
chr2	chr1	P	80	93.75	35676	35755	1308883	1308962	1.89e-25
chr2	chr1	P	70	95.714	36152	36221	488578	488647	3.16e-23
chr2	chr1	P	65	98.462	39996	40060	1045190	1045253	3.16e-23
chr2	chr1	P	182	78.022	39772	39952	188222	188398	4.09e-22
chr2	chr1	P	191	77.487	194779	194963	267842	268032	4.09e-22
chr2	chr1	P	130	83.077	39458	39579	1433291	1433416	1.47e-21
chr2	chr1	P	72	93.056	38003	38074	1379664	1379735	5.30e-21
chr2	chr1	P	79	91.139	39506	39584	1379661	1379735	1.90e-20
chr2	chr1	P	81	90.123	186649	186729	213887	213964	6.85e-20
chr2	chr1	P	70	92.857	186651	186720	2089114	2089180	8.86e-19
chr2	chr1	P	56	98.214	126294	126349	2115439	2115494	8.86e-19
chr2	chr1	P	54	98.148	38013	38066	276873	276926	1.15e-17
chr2	chr1	P	54	98.148	126296	126349	497697	497750	1.15e-17
chr2	chr1	P	54	98.148	126296	126349	2119046	2119099	1.15e-17
chr2	chr1	P	64	92.188	48858	48921	524213	524276	1.48e-16
chr2	chr1	P	51	98.039	186670	186720	452644	452694	5.33e-16
chr2	chr1	P	266	73.308	90791	91054	1218126	1218384	5.33e-16
chr2	chr1	P	76	88.158	38001	38072	1978078	1978153	1.92e-15
chr2	chr1	P	49	95.918	116012	116060	1433373	1433421	3.21e-13
chr2	chr1	P	76	85.526	158042	158117	1446883	1446958	3.21e-13
chr2	chr1	P	42	100	182399	182440	308999	309040	1.15e-12
chr2	chr1	P	117	78.632	91472	91587	1976781	1976897	4.15e-12
chr2	chr1	P	199	73.367	177826	178023	1037556	1037753	5.37e-11
chr2	chr1	P	49	93.878	36154	36201	1623166	1623214	5.37e-11
chr2	chr1	P	56	89.286	108583	108638	219032	219087	1.93e-10
chr2	chr1	P	144	75.694	31843	31985	492616	492758	1.93e-10
chr2	chr1	P	85	81.176	33094	33178	394712	394796	6.95e-10
chr2	chr1	P	55	89.091	32458	32512	395392	395446	6.95e-10
chr2	chr1	P	45	93.333	231182	231226	1082867	1082911	2.50e-09
chr2	chr1	P	54	87.037	166813	166866	314260	314313	1.16e-07
chr2	chr1	P	39	94.872	170182	170220	2031212	2031250	1.16e-07
chr2	chr1	P	35	97.143	182721	182755	51757	51791	4.18e-07
chr2	chr1	P	159	73.585	163629	163786	105001	105158	4.18e-07
chr2	chr1	P	90	78.889	71928	72017	288249	288337	4.18e-07
chr2	chr1	P	64	84.375	188020	188082	1578579	1578639	4.18e-07
chr2	chr1	P	53	86.792	231665	231717	1837537	1837589	4.18e-07
chr2	chr1	P	32	100	21577	21608	2025771	2025802	4.18e-07
chr2	chr1	F	103	77.67	59571	59672	28063	28161	1.50e-06
chr2	chr1	F	31	100	116031	116061	51765	51795	1.50e-06
chr2	chr1	F	31	100	182365	182395	60368	60398	1.50e-06
chr2	chr1	P	31	100	15380	15410	194908	194938	1.50e-06
chr2	chr1	F	74	81.081	76544	76616	226953	227025	1.50e-06
chr2	chr1	F	48	89.583	39611	39658	268795	268839	1.50e-06
chr2	chr1	F	34	97.059	5202	5235	475496	475529	1.50e-06
chr2	chr1	F	34	97.059	182246	182279	479126	479159	1.50e-06
chr2	chr1	P	41	92.683	36545	36585	517971	518010	1.50e-06
chr2	chr1	P	31	100	37908	37938	539366	539396	1.50e-06
chr2	chr1	P	41	92.683	36154	36193	758208	758248	1.50e-06
chr2	chr1	P	71	83.099	101541	101611	807367	807429	1.50e-06
chr2	chr1	F	68	82.353	67922	67988	819212	819278	1.50e-06
chr2	chr1	P	41	92.683	182493	182533	881642	881681	1.50e-06
chr2	chr1	F	44	90.909	111703	111746	902679	902721	1.50e-06
chr2	chr1	F	37	94.595	182794	182830	961825	961861	1.50e-06
chr2	chr1	P	74	81.081	64902	64974	1090967	1091039	1.50e-06
chr2	chr1	F	62	83.871	68589	68650	1115032	1115091	1.50e-06
chr2	chr1	F	61	83.607	4820	4880	1161331	1161391	1.50e-06
chr2	chr1	F	65	83.077	68282	68346	1251384	1251447	1.50e-06
chr2	chr1	F	40	92.5	38001	38040	1364264	1364303	1.50e-06
chr2	chr1	F	40	92.5	39504	39543	1364264	1364303	1.50e-06
chr2	chr1	P	81	80.247	22	100	1368147	1368226	1.50e-06
chr2	chr1	P	34	97.059	182246	182279	1369524	1369557	1.50e-06
chr2	chr1	P	90	78.889	95385	95473	1546113	1546200	1.50e-06
chr2	chr1	P	54	87.037	36155	36207	1578589	1578639	1.50e-06
chr2	chr1	F	44	90.909	126326	126368	1667297	1667340	1.50e-06
chr2	chr1	P	71	83.099	101541	101611	1702601	1702663	1.50e-06
chr2	chr1	P	34	97.059	7012	7045	1845321	1845354	1.50e-06
chr2	chr1	F	101	78.218	217481	217579	1893482	1893576	1.50e-06
chr2	chr1	P	34	97.059	98732	98765	2006392	2006425	1.50e-06
chr2	chr1	F	35	97.143	182511	182545	2081394	2081427	1.50e-06
chr2	chr1	P	49	87.755	116012	116060	2081500	2081548	1.50e-06
chr2	chr1	P	43	90.698	182757	182798	33780	33822	5.41e-06
chr2	chr1	P	36	94.444	182539	182574	208583	208618	5.41e-06
chr2	chr1	P	83	79.518	32428	32509	492053	492133	5.41e-06
chr2	chr1	P	34	97.059	39424	39456	539368	539401	5.41e-06
chr2	chr1	P	36	94.444	106541	106576	602601	602636	5.41e-06
chr2	chr1	F	33	96.97	193634	193666	650020	650052	5.41e-06
chr2	chr1	P	57	85.965	10088	10139	706111	706167	5.41e-06
chr2	chr1	P	45	88.889	37954	37998	732481	732525	5.41e-06
chr2	chr1	F	50	88	46322	46367	953420	953469	5.41e-06
chr2	chr1	F	48	87.5	38403	38450	1129920	1129967	5.41e-06
chr2	chr1	F	64	84.375	39504	39567	1213435	1213491	5.41e-06
chr2	chr1	F	46	89.13	98231	98276	1341370	1341414	5.41e-06
chr2	chr1	F	43	90.698	126326	126367	1358945	1358987	5.41e-06
chr2	chr1	F	30	100	25244	25273	1367753	1367782	5.41e-06
chr2	chr1	F	70	81.429	39778	39846	1380363	1380431	5.41e-06
chr2	chr1	F	46	89.13	40005	40050	1580548	1580592	5.41e-06
chr2	chr1	P	54	85.185	70909	70962	1588483	1588536	5.41e-06
chr2	chr1	F	33	96.97	4816	4848	1670724	1670756	5.41e-06
chr2	chr1	P	30	100	148368	148397	1764131	1764160	5.41e-06
chr2	chr1	F	33	96.97	40028	40060	1831946	1831978	5.41e-06
chr2	chr1	F	55	85.455	232108	232161	1965464	1965517	5.41e-06
chr2	chr1	P	30	100	39427	39456	2081562	2081591	5.41e-06
