# Supplementary material for: Report on the complete mitochondrial genome of the critically endangered and endemic Lauraceae plant Syndiclis anlungensis in China
Source: Research Square preprint supplement (doi:10.21203/rs.3.rs-6835863/v1), 2025-07-01
Supplement: Supplementary file 4 [file 676a8c3f84d1ede7b78868a7.xlsx]

## Sheet: Table S6
Table S6. Ka/Ks ratios of conserved PCGs in the mitochondrial genomes of S. anlungensis, C. henryi, C. camphora, and C. chekiangense
Ka/Ks	Gene
0.0804914	atp1
0.107132	atp1
0.110932	atp1
0.110932	atp1
0.0309921	atp1
0.493473	atp4
0.47166	atp4
0.633157	atp4
0.661037	atp4
0.479865	atp4
0.540714	atp6
0.409459	atp6
0.0706046	atp6
0.46479	atp6
0.197432	atp6
0.24998	atp6
0.343554	atp8
0.2294	atp8
0.205269	atp8
0.515403	atp8
0.157618	atp8
0.363221	atp9
0.363221	atp9
0.229279	ccmB
0.229279	ccmB
0.46987	ccmB
0.46987	ccmB
1.31004	ccmB
0.29811	ccmC
0.48252	ccmC
0.434092	ccmC
0.329864	ccmC
0.35424	ccmC
0.453722	ccmC
0.63755	ccmFc
0.63755	ccmFc
1.3416	ccmFc
1.3416	ccmFc
2.98482	ccmFc
0.219742	ccmFn
0.219742	ccmFn
0.635936	ccmFn
0.635936	ccmFn
0.520586	ccmFn
0.381531	cob
0.381531	cob
1.24531	cob
1.24531	cob
1.72331	cob
0.326319	cox1
3.24764	cox1
0.444911	cox1
0.297682	cox1
0.297377	cox1
0.239409	cox2
0.118773	cox2
0.24232	cox2
0.479607	cox2
0.272834	cox3
0.37786	mttB
0.251786	mttB
0.065595	mttB
0.358387	nad1
0.358387	nad1
0.358137	nad1
0.358137	nad1
0.145704	nad1
0.527265	nad2
0.527265	nad2
0.505805	nad2
0.505805	nad2
0.22054	nad2
0.237857	nad3
0.237857	nad3
0.119154	nad3
0.119154	nad3
0.184454	nad3
0.33036	nad4
0.33036	nad4
0.500634	nad4
0.500634	nad4
0.679045	nad4
0.362034	nad4L
0.362034	nad4L
0.428425	nad4L
0.428425	nad4L
0.953053	nad4L
0.255595	nad5
0.221073	nad5
0.533104	nad5
0.28618	nad5
0.463636	nad5
0.630968	nad6
0.749345	nad6
0.449571	nad6
0.636625	nad6
0.594093	nad6
0.442746	nad7
0.231339	nad7
0.422904	nad7
0.127202	nad7
0.379773	nad7
0.23481	rpl10
0.414887	rpl10
0.467942	rpl10
0.414887	rpl10
0.467942	rpl10
0.132582	rpl16
0.132582	rpl16
2.76801	rpl16
2.76801	rpl16
0.368908	rpl16
1.84514	rpl2
2.96897	rpl2
0.717221	rpl2
0.549892	rpl2
1.25852	rpl2
0.110623	rpl5
0.110623	rpl5
0.553398	rpl5
0.553398	rpl5
0.268212	rpl5
1.04398	rps1
0.638897	rps1
0.481052	rps1
0.369813	rps1
0.819866	rps1
1.12287	rps10
0.618758	rps10
0.587671	rps10
0.433694	rps10
0.423821	rps10
0.115423	rps11
0.115423	rps11
0.115692	rps11
0.127392	rps12
0.127392	rps12
0.127392	rps12
0.127392	rps12
0.471946	rps14
0.471946	rps14
0.324481	rps14
0.324481	rps14
0.568276	rps19
0.568276	rps19
0.706876	rps19
0.706876	rps19
0.588732	rps19
0.560731	rps2
0.560731	rps2
0.449368	rps2
0.449368	rps2
0.406608	rps2
1.19841	rps3
1.19841	rps3
0.50891	rps3
0.50891	rps3
0.950459	rps3
0.15586	rps4
0.15586	rps4
0.168549	rps4
0.168549	rps4
0.173705	rps4
1.59434	rps7
1.59434	rps7
0.909029	sdh3
1.13398	sdh3
0.60328	sdh3
1.09913	sdh3
0.373896	sdh3
0.428075	sdh4
0.87357	sdh4
0.424881	sdh4
0.420134	sdh4
0.425562	sdh4
0.429626	sdh4
