# Supplementary material for: Report on the complete mitochondrial genome of the critically endangered and endemic Lauraceae plant Syndiclis anlungensis in China
Source: Research Square preprint supplement (doi:10.21203/rs.3.rs-6835863/v1), 2025-07-01
Supplement: Supplementary file 5 [file abf698ab473901cadbe680b1.xlsx]

## Sheet: Table S3
Table S3. Codon preference information
AminoAcid	Symbol	Codon	No.	RSCU
*	Ter	UAA	20	1.5
*	Ter	UAG	6	0.45
*	Ter	UGA	14	1.05
A	Ala	GCA	177	1.0396
A	Ala	GCC	137	0.8047
A	Ala	GCG	86	0.5051
A	Ala	GCU	281	1.6505
C	Cys	UGC	60	0.8054
C	Cys	UGU	89	1.1946
D	Asp	GAC	92	0.5242
D	Asp	GAU	259	1.4758
E	Glu	GAA	308	1.3781
E	Glu	GAG	139	0.6219
F	Phe	UUC	299	0.93
F	Phe	UUU	344	1.07
G	Gly	GGA	275	1.4379
G	Gly	GGC	102	0.5333
G	Gly	GGG	140	0.732
G	Gly	GGU	248	1.2967
H	His	CAC	55	0.3929
H	His	CAU	225	1.6071
I	Ile	AUA	205	0.7707
I	Ile	AUC	239	0.8985
I	Ile	AUU	354	1.3308
K	Lys	AAA	287	1.2318
K	Lys	AAG	179	0.7682
L	Leu	CUA	137	0.8107
L	Leu	CUC	111	0.6568
L	Leu	CUG	96	0.568
L	Leu	CUU	227	1.3432
L	Leu	UUA	225	1.3314
L	Leu	UUG	218	1.2899
M	Met	AUG	312	1
N	Asn	AAC	107	0.6239
N	Asn	AAU	236	1.3761
P	Pro	CCA	199	1.1654
P	Pro	CCC	125	0.7321
P	Pro	CCG	119	0.6969
P	Pro	CCU	240	1.4056
Q	Gln	CAA	236	1.5375
Q	Gln	CAG	71	0.4625
R	Arg	AGA	176	1.3469
R	Arg	AGG	89	0.6811
R	Arg	CGA	168	1.2857
R	Arg	CGC	83	0.6352
R	Arg	CGG	99	0.7577
R	Arg	CGU	169	1.2934
S	Ser	AGC	97	0.546
S	Ser	AGU	178	1.0019
S	Ser	UCA	206	1.1595
S	Ser	UCC	182	1.0244
S	Ser	UCG	156	0.878
S	Ser	UCU	247	1.3902
T	Thr	ACA	135	0.9854
T	Thr	ACC	144	1.0511
T	Thr	ACG	79	0.5766
T	Thr	ACU	190	1.3869
V	Val	GUA	197	1.1622
V	Val	GUC	122	0.7198
V	Val	GUG	172	1.0147
V	Val	GUU	187	1.1032
W	Trp	UGG	147	1
Y	Tyr	UAC	67	0.4437
Y	Tyr	UAU	235	1.5563
