# Supplementary material for: Report on the complete mitochondrial genome of the critically endangered and endemic Lauraceae plant Syndiclis anlungensis in China
Source: Research Square preprint supplement (doi:10.21203/rs.3.rs-6835863/v1), 2025-07-01
Supplement: Supplementary file 6 [file ccab64907f038e624bb98b84.xlsx]

## Sheet: Table S2A
Table S2A. Different kinds of changes in amino acid codons
Type	RNA-editing	Number	Percentage
hydrophilic-hydrophilic	CAC (H) => TAC (Y)	10
	CAT (H) => TAT (Y)	27
	CGC (R) => TGC (C)	17
	CGT (R) => TGT (C)	38
	total	92	0.1219
hydrophilic-hydrophobic	ACA (T) => ATA (I)	8
	ACC (T) => ATC (I)	1
	ACG (T) => ATG (M)	10
	ACT (T) => ATT (I)	4
	CGG (R) => TGG (W)	43
	TCA (S) => TTA (L)	102
	TCC (S) => TTC (F)	52
	TCG (S) => TTG (L)	66
	TCT (S) => TTT (F)	71
	total	357	0.4728
hydrophilic-stop	CAA (Q) => TAA (X)	2
	CAG (Q) => TAG (X)	1
	CGA (R) => TGA (X)	2
	total	5	0.0066
hydrophobic-hydrophilic	CCA (P) => TCA (S)	14
	CCC (P) => TCC (S)	16
	CCG (P) => TCG (S)	10
	CCT (P) => TCT (S)	29
	total	69	0.0914
hydrophobic-hydrophobic	CCA (P) => CTA (L)	65
	CCC (P) => CTC (L)	13
	CCC (P) => TTC (F)	10
	CCG (P) => CTG (L)	49
	CCT (P) => CTT (L)	35
	CCT (P) => TTT (F)	18
	CTC (L) => TTC (F)	12
	CTT (L) => TTT (F)	17
	GCA (A) => GTA (V)	2
	GCG (A) => GTG (V)	7
	GCT (A) => GTT (V)	4
	total	232	0.3073
	All	755	1

## Sheet: Table S2B
Table S2B. Prediction of RNA Editing sites in different PCGS
ID	Gene	Nt Pos	AA Pos	Align Col	Effect	Score
Syndiclis_anlungensis_1	atp1	670	224	226	CCA (P) => TCA (S)	0.8
Syndiclis_anlungensis_1	atp1	971	324	326	TCG (S) => TTG (L)	0.8
Syndiclis_anlungensis_1	atp1	1039	347	349	CCC (P) => TCC (S)	1
Syndiclis_anlungensis_1	atp1	1064	355	357	TCG (S) => TTG (L)	1
Syndiclis_anlungensis_1	atp1	1115	372	374	TCA (S) => TTA (L)	1
Syndiclis_anlungensis_1	atp1	1168	390	392	CGC (R) => TGC (C)	1
Syndiclis_anlungensis_1	atp1	1178	393	395	TCA (S) => TTA (L)	0.9
Syndiclis_anlungensis_1	atp1	1216	406	408	CTT (L) => TTT (F)	1
Syndiclis_anlungensis_1	atp1	1262	421	423	CCA (P) => CTA (L)	1
Syndiclis_anlungensis_1	atp1	1292	431	433	CCC (P) => CTC (L)	0.8
Syndiclis_anlungensis_1	atp1	1415	472	474	CCA (P) => CTA (L)	1
Syndiclis_anlungensis_1	atp1	1490	497	499	CCA (P) => CTA (L)	0.9
Syndiclis_anlungensis_1	atp1	1499	500	502	TCT (S) => TTT (F)	0.9
Syndiclis_anlungensis_1	atp4	56	19	23	CCA (P) => CTA (L)	0.86
Syndiclis_anlungensis_1	atp4	59	20	24	TCT (S) => TTT (F)	0.57
Syndiclis_anlungensis_1	atp4	71	24	28	TCA (S) => TTA (L)	1
Syndiclis_anlungensis_1	atp4	76	26	30	CCG (P) => TCG (S)	1
Syndiclis_anlungensis_1	atp4	89	30	34	TCA (S) => TTA (L)	1
Syndiclis_anlungensis_1	atp4	118	40	44	CGT (R) => TGT (C)	0.71
Syndiclis_anlungensis_1	atp4	121	41	45	CGT (R) => TGT (C)	1
Syndiclis_anlungensis_1	atp4	215	72	76	TCG (S) => TTG (L)	1
Syndiclis_anlungensis_1	atp4	226	76	80	CCC (P) => TTC (F)	0.57
Syndiclis_anlungensis_1	atp4	227	76	80	CCC (P) => TTC (F)	0.57
Syndiclis_anlungensis_1	atp4	248	83	87	CCT (P) => CTT (L)	1
Syndiclis_anlungensis_1	atp4	251	84	88	CCG (P) => CTG (L)	0.43
Syndiclis_anlungensis_1	atp4	326	109	117	ACG (T) => ATG (M)	0.43
Syndiclis_anlungensis_1	atp4	395	132	140	TCA (S) => TTA (L)	1
Syndiclis_anlungensis_1	atp4	407	136	144	CCA (P) => CTA (L)	0.71
Syndiclis_anlungensis_1	atp4	416	139	147	ACT (T) => ATT (I)	0.86
Syndiclis_anlungensis_1	atp4	490	164	172	CCC (P) => TCC (S)	0.57
Syndiclis_anlungensis_1	atp6	37	13	30	CCA (P) => TCA (S)	0.75
Syndiclis_anlungensis_1	atp6	47	16	33	TCT (S) => TTT (F)	1
Syndiclis_anlungensis_1	atp6	116	39	56	TCA (S) => TTA (L)	1
Syndiclis_anlungensis_1	atp6	154	52	69	CAT (H) => TAT (Y)	1
Syndiclis_anlungensis_1	atp6	167	56	73	CCG (P) => CTG (L)	1
Syndiclis_anlungensis_1	atp6	173	58	75	CCG (P) => CTG (L)	1
Syndiclis_anlungensis_1	atp6	224	75	92	TCC (S) => TTC (F)	1
Syndiclis_anlungensis_1	atp6	229	77	94	CGC (R) => TGC (C)	0.75
Syndiclis_anlungensis_1	atp6	236	79	96	TCG (S) => TTG (L)	0.67
Syndiclis_anlungensis_1	atp6	245	82	99	TCT (S) => TTT (F)	1
Syndiclis_anlungensis_1	atp6	254	85	102	TCG (S) => TTG (L)	1
Syndiclis_anlungensis_1	atp6	262	88	105	CGT (R) => TGT (C)	1
Syndiclis_anlungensis_1	atp6	269	90	107	CCC (P) => CTC (L)	1
Syndiclis_anlungensis_1	atp6	337	113	130	CCG (P) => TCG (S)	1
Syndiclis_anlungensis_1	atp6	401	134	151	TCA (S) => TTA (L)	1
Syndiclis_anlungensis_1	atp6	460	154	171	CCT (P) => TCT (S)	1
Syndiclis_anlungensis_1	atp6	463	155	172	CAT (H) => TAT (Y)	1
Syndiclis_anlungensis_1	atp6	485	162	179	TCA (S) => TTA (L)	1
Syndiclis_anlungensis_1	atp6	527	176	193	TCA (S) => TTA (L)	1
Syndiclis_anlungensis_1	atp6	548	183	200	TCC (S) => TTC (F)	1
Syndiclis_anlungensis_1	atp6	599	200	217	CCT (P) => CTT (L)	0.92
Syndiclis_anlungensis_1	atp6	635	212	229	CCG (P) => CTG (L)	1
Syndiclis_anlungensis_1	atp6	656	219	236	TCA (S) => TTA (L)	1
Syndiclis_anlungensis_1	atp6	664	222	239	CAT (H) => TAT (Y)	1
Syndiclis_anlungensis_1	atp6	671	224	241	TCT (S) => TTT (F)	1
Syndiclis_anlungensis_1	atp6	680	227	244	TCA (S) => TTA (L)	1
Syndiclis_anlungensis_1	atp6	707	236	253	ACA (T) => ATA (I)	0.92
Syndiclis_anlungensis_1	atp6	718	240	257	CAA (Q) => TAA (X)	1
Syndiclis_anlungensis_1	atp8	47	16	16	TCA (S) => TTA (L)	1
Syndiclis_anlungensis_1	atp8	55	19	19	CTC (L) => TTC (F)	0.75
Syndiclis_anlungensis_1	atp8	58	20	20	CTC (L) => TTC (F)	1
Syndiclis_anlungensis_1	atp8	76	26	26	CCC (P) => TTC (F)	0.38
Syndiclis_anlungensis_1	atp8	77	26	26	CCC (P) => TTC (F)	0.38
Syndiclis_anlungensis_1	atp8	200	67	67	TCG (S) => TTG (L)	1
Syndiclis_anlungensis_1	atp8	452	151	151	CCA (P) => CTA (L)	0.75
Syndiclis_anlungensis_1	atp9	20	7	7	TCA (S) => TTA (L)	1
Syndiclis_anlungensis_1	atp9	50	17	17	TCA (S) => TTA (L)	1
Syndiclis_anlungensis_1	atp9	82	28	28	CTT (L) => TTT (F)	1
Syndiclis_anlungensis_1	atp9	92	31	31	TCG (S) => TTG (L)	1
Syndiclis_anlungensis_1	atp9	134	45	45	TCA (S) => TTA (L)	1
Syndiclis_anlungensis_1	atp9	182	61	61	TCG (S) => TTG (L)	1
Syndiclis_anlungensis_1	atp9	191	64	64	CCA (P) => CTA (L)	1
Syndiclis_anlungensis_1	atp9	203	68	68	TCT (S) => TTT (F)	1
Syndiclis_anlungensis_1	atp9	212	71	71	TCA (S) => TTA (L)	1
Syndiclis_anlungensis_1	atp9	215	72	72	TCC (S) => TTC (F)	1
Syndiclis_anlungensis_1	ccmB	13	5	5	CTT (L) => TTT (F)	1
Syndiclis_anlungensis_1	ccmB	28	10	10	CAT (H) => TAT (Y)	0.89
Syndiclis_anlungensis_1	ccmB	41	14	14	TCC (S) => TTC (F)	0.78
Syndiclis_anlungensis_1	ccmB	43	15	17	CCC (P) => TCC (S)	0.67
Syndiclis_anlungensis_1	ccmB	71	24	26	CCA (P) => CTA (L)	1
Syndiclis_anlungensis_1	ccmB	80	27	29	TCG (S) => TTG (L)	1
Syndiclis_anlungensis_1	ccmB	128	43	45	TCA (S) => TTA (L)	1
Syndiclis_anlungensis_1	ccmB	137	46	48	TCC (S) => TTC (F)	1
Syndiclis_anlungensis_1	ccmB	149	50	52	CCG (P) => CTG (L)	1
Syndiclis_anlungensis_1	ccmB	154	52	54	CGG (R) => TGG (W)	1
Syndiclis_anlungensis_1	ccmB	160	54	56	CCT (P) => TCT (S)	0.67
Syndiclis_anlungensis_1	ccmB	164	55	57	CCG (P) => CTG (L)	0.89
Syndiclis_anlungensis_1	ccmB	172	58	60	CCT (P) => TCT (S)	0.89
Syndiclis_anlungensis_1	ccmB	179	60	62	CCT (P) => CTT (L)	1
Syndiclis_anlungensis_1	ccmB	181	61	63	CCC (P) => TCC (S)	0.78
Syndiclis_anlungensis_1	ccmB	193	65	69	CCT (P) => TTT (F)	0.89
Syndiclis_anlungensis_1	ccmB	194	65	69	CCT (P) => TTT (F)	0.89
Syndiclis_anlungensis_1	ccmB	286	96	102	CGG (R) => TGG (W)	1
Syndiclis_anlungensis_1	ccmB	304	102	108	CGT (R) => TGT (C)	0.78
Syndiclis_anlungensis_1	ccmB	313	105	111	CGC (R) => TGC (C)	0.89
Syndiclis_anlungensis_1	ccmB	338	113	119	CCG (P) => CTG (L)	1
Syndiclis_anlungensis_1	ccmB	367	123	129	CGG (R) => TGG (W)	0.78
Syndiclis_anlungensis_1	ccmB	380	127	133	CCA (P) => CTA (L)	0.78
Syndiclis_anlungensis_1	ccmB	392	131	137	CCG (P) => CTG (L)	0.89
Syndiclis_anlungensis_1	ccmB	424	142	148	CGT (R) => TGT (C)	0.89
Syndiclis_anlungensis_1	ccmB	428	143	149	TCG (S) => TTG (L)	1
Syndiclis_anlungensis_1	ccmB	467	156	163	TCG (S) => TTG (L)	0.89
Syndiclis_anlungensis_1	ccmB	476	159	166	CCA (P) => CTA (L)	0.89
Syndiclis_anlungensis_1	ccmB	485	162	169	TCA (S) => TTA (L)	1
Syndiclis_anlungensis_1	ccmB	494	165	172	TCA (S) => TTA (L)	1
Syndiclis_anlungensis_1	ccmB	503	168	175	CCA (P) => CTA (L)	1
Syndiclis_anlungensis_1	ccmB	512	171	178	TCC (S) => TTC (F)	1
Syndiclis_anlungensis_1	ccmB	514	172	179	CGT (R) => TGT (C)	1
Syndiclis_anlungensis_1	ccmB	551	184	191	TCA (S) => TTA (L)	1
Syndiclis_anlungensis_1	ccmB	554	185	192	TCG (S) => TTG (L)	0.89
Syndiclis_anlungensis_1	ccmB	566	189	196	TCC (S) => TTC (F)	0.78
Syndiclis_anlungensis_1	ccmB	569	190	197	TCT (S) => TTT (F)	0.78
Syndiclis_anlungensis_1	ccmB	572	191	198	CCG (P) => CTG (L)	1
Syndiclis_anlungensis_1	ccmB	584	195	202	CCT (P) => CTT (L)	0.78
Syndiclis_anlungensis_1	ccmB	587	196	203	TCT (S) => TTT (F)	0.56
Syndiclis_anlungensis_1	ccmB	596	199	206	TCG (S) => TTG (L)	0.89
Syndiclis_anlungensis_1	ccmB	611	204	211	TCA (S) => TTA (L)	0.89
Syndiclis_anlungensis_1	ccmC	76	26	32	CGG (R) => TGG (W)	0.78
Syndiclis_anlungensis_1	ccmC	103	35	41	CAT (H) => TAT (Y)	1
Syndiclis_anlungensis_1	ccmC	107	36	42	TCA (S) => TTA (L)	1
Syndiclis_anlungensis_1	ccmC	115	39	45	CGG (R) => TGG (W)	0.78
Syndiclis_anlungensis_1	ccmC	128	43	49	CCA (P) => CTA (L)	0.56
Syndiclis_anlungensis_1	ccmC	133	45	51	CTT (L) => TTT (F)	0.67
Syndiclis_anlungensis_1	ccmC	161	54	60	CCG (P) => CTG (L)	0.78
Syndiclis_anlungensis_1	ccmC	179	60	66	GCG (A) => GTG (V)	0.78
Syndiclis_anlungensis_1	ccmC	184	62	68	CGG (R) => TGG (W)	1
Syndiclis_anlungensis_1	ccmC	227	76	82	TCC (S) => TTC (F)	0.78
Syndiclis_anlungensis_1	ccmC	256	86	92	CTT (L) => TTT (F)	0.78
Syndiclis_anlungensis_1	ccmC	281	94	100	ACA (T) => ATA (I)	0.56
Syndiclis_anlungensis_1	ccmC	299	100	106	TCT (S) => TTT (F)	1
Syndiclis_anlungensis_1	ccmC	331	111	117	CGG (R) => TGG (W)	1
Syndiclis_anlungensis_1	ccmC	358	120	126	CGG (R) => TGG (W)	1
Syndiclis_anlungensis_1	ccmC	395	132	138	TCG (S) => TTG (L)	1
Syndiclis_anlungensis_1	ccmC	400	134	140	CTT (L) => TTT (F)	0.89
Syndiclis_anlungensis_1	ccmC	436	146	152	CCT (P) => TCT (S)	0.89
Syndiclis_anlungensis_1	ccmC	446	149	155	CCG (P) => CTG (L)	0.78
Syndiclis_anlungensis_1	ccmC	451	151	157	CCT (P) => TCT (S)	1
Syndiclis_anlungensis_1	ccmC	458	153	159	TCA (S) => TTA (L)	0.78
Syndiclis_anlungensis_1	ccmC	463	155	161	CGT (R) => TGT (C)	1
Syndiclis_anlungensis_1	ccmC	467	156	162	GCT (A) => GTT (V)	0.78
Syndiclis_anlungensis_1	ccmC	473	158	164	CCG (P) => CTG (L)	1
Syndiclis_anlungensis_1	ccmC	499	167	173	CCA (P) => TCA (S)	1
Syndiclis_anlungensis_1	ccmC	521	174	180	TCG (S) => TTG (L)	1
Syndiclis_anlungensis_1	ccmC	548	183	189	TCT (S) => TTT (F)	1
Syndiclis_anlungensis_1	ccmC	568	190	196	CCT (P) => TCT (S)	1
Syndiclis_anlungensis_1	ccmC	575	192	198	CCC (P) => CTC (L)	1
Syndiclis_anlungensis_1	ccmC	605	202	208	TCC (S) => TTC (F)	1
Syndiclis_anlungensis_1	ccmC	608	203	209	CCC (P) => CTC (L)	0.89
Syndiclis_anlungensis_1	ccmC	614	205	211	TCA (S) => TTA (L)	0.78
Syndiclis_anlungensis_1	ccmC	619	207	213	CGT (R) => TGT (C)	0.78
Syndiclis_anlungensis_1	ccmC	650	217	223	CCT (P) => CTT (L)	0.78
Syndiclis_anlungensis_1	ccmC	656	219	225	CCA (P) => CTA (L)	0.89
Syndiclis_anlungensis_1	ccmC	673	225	231	CCC (P) => TCC (S)	0.78
Syndiclis_anlungensis_1	ccmFc	38	13	13	TCC (S) => TTC (F)	0.83
Syndiclis_anlungensis_1	ccmFc	50	17	17	CCT (P) => CTT (L)	1
Syndiclis_anlungensis_1	ccmFc	52	18	18	CGT (R) => TGT (C)	1
Syndiclis_anlungensis_1	ccmFc	103	35	35	CCC (P) => TCC (S)	1
Syndiclis_anlungensis_1	ccmFc	119	40	40	TCT (S) => TTT (F)	1
Syndiclis_anlungensis_1	ccmFc	122	41	41	TCC (S) => TTC (F)	1
Syndiclis_anlungensis_1	ccmFc	146	49	49	CCT (P) => CTT (L)	1
Syndiclis_anlungensis_1	ccmFc	151	51	51	CCT (P) => TCT (S)	0.83
Syndiclis_anlungensis_1	ccmFc	155	52	52	TCA (S) => TTA (L)	1
Syndiclis_anlungensis_1	ccmFc	160	54	54	CCT (P) => TCT (S)	0.67
Syndiclis_anlungensis_1	ccmFc	305	102	102	TCA (S) => TTA (L)	0.83
Syndiclis_anlungensis_1	ccmFc	310	104	104	CGT (R) => TGT (C)	0.5
Syndiclis_anlungensis_1	ccmFc	391	131	131	CGT (R) => TGT (C)	1
Syndiclis_anlungensis_1	ccmFc	406	136	136	CGT (R) => TGT (C)	0.83
Syndiclis_anlungensis_1	ccmFc	412	138	138	CTC (L) => TTC (F)	0.67
Syndiclis_anlungensis_1	ccmFc	811	271	275	CCC (P) => TCC (S)	0.83
Syndiclis_anlungensis_1	ccmFc	878	293	297	TCT (S) => TTT (F)	0.83
Syndiclis_anlungensis_1	ccmFc	1139	380	387	CCA (P) => CTA (L)	1
Syndiclis_anlungensis_1	ccmFc	1160	387	394	CCG (P) => CTG (L)	1
Syndiclis_anlungensis_1	ccmFc	1234	412	419	CGG (R) => TGG (W)	1
Syndiclis_anlungensis_1	ccmFc	1259	420	427	TCG (S) => TTG (L)	1
Syndiclis_anlungensis_1	ccmFc	1268	423	430	TCG (S) => TTG (L)	0.5
Syndiclis_anlungensis_1	ccmFc	1315	439	446	CGA (R) => TGA (X)	1
Syndiclis_anlungensis_1	ccmFn	20	7	9	TCT (S) => TTT (F)	0.67
Syndiclis_anlungensis_1	ccmFn	38	13	15	CCG (P) => CTG (L)	1
Syndiclis_anlungensis_1	ccmFn	98	33	35	CCC (P) => CTC (L)	1
Syndiclis_anlungensis_1	ccmFn	124	42	44	CCT (P) => TCT (S)	1
Syndiclis_anlungensis_1	ccmFn	140	47	49	TCG (S) => TTG (L)	1
Syndiclis_anlungensis_1	ccmFn	145	49	51	CGT (R) => TGT (C)	1
Syndiclis_anlungensis_1	ccmFn	154	52	54	CCT (P) => TCT (S)	0.83
Syndiclis_anlungensis_1	ccmFn	254	85	87	TCA (S) => TTA (L)	1
Syndiclis_anlungensis_1	ccmFn	262	88	90	CGG (R) => TGG (W)	1
Syndiclis_anlungensis_1	ccmFn	269	90	92	CCA (P) => CTA (L)	0.83
Syndiclis_anlungensis_1	ccmFn	289	97	99	CTT (L) => TTT (F)	0.83
Syndiclis_anlungensis_1	ccmFn	340	114	116	CAT (H) => TAT (Y)	0.67
Syndiclis_anlungensis_1	ccmFn	359	120	122	TCT (S) => TTT (F)	0.83
Syndiclis_anlungensis_1	ccmFn	362	121	123	TCC (S) => TTC (F)	0.67
Syndiclis_anlungensis_1	ccmFn	371	124	126	TCG (S) => TTG (L)	0.67
Syndiclis_anlungensis_1	ccmFn	484	162	166	CGT (R) => TGT (C)	0.83
Syndiclis_anlungensis_1	ccmFn	565	189	193	CCC (P) => TTC (F)	0.5
Syndiclis_anlungensis_1	ccmFn	566	189	193	CCC (P) => TTC (F)	0.5
Syndiclis_anlungensis_1	ccmFn	721	241	245	CCT (P) => TTT (F)	0.67
Syndiclis_anlungensis_1	ccmFn	722	241	245	CCT (P) => TTT (F)	0.67
Syndiclis_anlungensis_1	ccmFn	731	244	248	TCA (S) => TTA (L)	0.83
Syndiclis_anlungensis_1	ccmFn	791	264	268	TCA (S) => TTA (L)	1
Syndiclis_anlungensis_1	ccmFn	803	268	272	CCA (P) => CTA (L)	1
Syndiclis_anlungensis_1	ccmFn	818	273	277	TCA (S) => TTA (L)	1
Syndiclis_anlungensis_1	ccmFn	835	279	283	CGC (R) => TGC (C)	1
Syndiclis_anlungensis_1	ccmFn	967	323	327	CGC (R) => TGC (C)	1
Syndiclis_anlungensis_1	ccmFn	1202	401	422	TCG (S) => TTG (L)	0.5
Syndiclis_anlungensis_1	ccmFn	1285	429	450	CGG (R) => TGG (W)	1
Syndiclis_anlungensis_1	ccmFn	1301	434	455	GCA (A) => GTA (V)	1
Syndiclis_anlungensis_1	ccmFn	1310	437	458	TCG (S) => TTG (L)	0.67
Syndiclis_anlungensis_1	ccmFn	1313	438	459	CCA (P) => CTA (L)	1
Syndiclis_anlungensis_1	ccmFn	1330	444	465	CAT (H) => TAT (Y)	1
Syndiclis_anlungensis_1	ccmFn	1345	449	470	CGG (R) => TGG (W)	1
Syndiclis_anlungensis_1	ccmFn	1363	455	476	CGG (R) => TGG (W)	1
Syndiclis_anlungensis_1	ccmFn	1396	466	487	CGG (R) => TGG (W)	1
Syndiclis_anlungensis_1	ccmFn	1414	472	493	CGT (R) => TGT (C)	1
Syndiclis_anlungensis_1	ccmFn	1457	486	507	TCG (S) => TTG (L)	1
Syndiclis_anlungensis_1	ccmFn	1477	493	514	CTT (L) => TTT (F)	1
Syndiclis_anlungensis_1	ccmFn	1481	494	515	CCA (P) => CTA (L)	1
Syndiclis_anlungensis_1	ccmFn	1493	498	519	TCA (S) => TTA (L)	1
Syndiclis_anlungensis_1	ccmFn	1502	501	522	TCT (S) => TTT (F)	1
Syndiclis_anlungensis_1	ccmFn	1528	510	531	CCC (P) => TCC (S)	1
Syndiclis_anlungensis_1	ccmFn	1541	514	535	TCT (S) => TTT (F)	1
Syndiclis_anlungensis_1	ccmFn	1576	526	547	CGG (R) => TGG (W)	0.67
Syndiclis_anlungensis_1	cob	76	26	27	CAT (H) => TAT (Y)	1
Syndiclis_anlungensis_1	cob	118	40	41	CCG (P) => TCG (S)	0.92
Syndiclis_anlungensis_1	cob	178	60	61	CAC (H) => TAC (Y)	1
Syndiclis_anlungensis_1	cob	286	96	97	CTC (L) => TTC (F)	1
Syndiclis_anlungensis_1	cob	298	100	101	CAC (H) => TAC (Y)	1
Syndiclis_anlungensis_1	cob	325	109	110	CAT (H) => TAT (Y)	1
Syndiclis_anlungensis_1	cob	358	120	121	CGG (R) => TGG (W)	1
Syndiclis_anlungensis_1	cob	407	136	137	ACA (T) => ATA (I)	1
Syndiclis_anlungensis_1	cob	419	140	141	CCA (P) => CTA (L)	1
Syndiclis_anlungensis_1	cob	568	190	191	CAT (H) => TAT (Y)	0.92
Syndiclis_anlungensis_1	cob	580	194	195	CTT (L) => TTT (F)	1
Syndiclis_anlungensis_1	cob	679	227	228	CCT (P) => TTT (F)	1
Syndiclis_anlungensis_1	cob	680	227	228	CCT (P) => TTT (F)	1
Syndiclis_anlungensis_1	cob	715	239	240	CGG (R) => TGG (W)	1
Syndiclis_anlungensis_1	cob	725	242	243	TCT (S) => TTT (F)	1
Syndiclis_anlungensis_1	cob	737	246	247	TCT (S) => TTT (F)	0.92
Syndiclis_anlungensis_1	cob	770	257	258	TCG (S) => TTG (L)	1
Syndiclis_anlungensis_1	cob	808	270	271	CCC (P) => TCC (S)	1
Syndiclis_anlungensis_1	cob	853	285	286	CAT (H) => TAT (Y)	1
Syndiclis_anlungensis_1	cob	908	303	304	CCA (P) => CTA (L)	1
Syndiclis_anlungensis_1	cob	914	305	306	TCT (S) => TTT (F)	1
Syndiclis_anlungensis_1	cob	982	328	329	CAC (H) => TAC (Y)	0.85
Syndiclis_anlungensis_1	cob	1015	339	340	CGC (R) => TGC (C)	1
Syndiclis_anlungensis_1	cob	1081	361	362	CCT (P) => TCT (S)	0.77
Syndiclis_anlungensis_1	cob	1100	367	368	TCG (S) => TTG (L)	0.77
Syndiclis_anlungensis_1	cob	1124	375	376	CCG (P) => CTG (L)	1
Syndiclis_anlungensis_1	cox2	22	8	10	CTC (L) => TTC (F)	0.95
Syndiclis_anlungensis_1	cox2	71	24	26	TCT (S) => TTT (F)	1
Syndiclis_anlungensis_1	cox2	161	54	56	TCA (S) => TTA (L)	0.95
Syndiclis_anlungensis_1	cox2	163	55	57	CGG (R) => TGG (W)	1
Syndiclis_anlungensis_1	cox2	253	85	87	CGG (R) => TGG (W)	1
Syndiclis_anlungensis_1	cox2	278	93	95	CCG (P) => CTG (L)	1
Syndiclis_anlungensis_1	cox2	379	127	129	CGG (R) => TGG (W)	1
Syndiclis_anlungensis_1	cox2	443	148	150	ACG (T) => ATG (M)	1
Syndiclis_anlungensis_1	cox2	461	154	156	CCA (P) => CTA (L)	1
Syndiclis_anlungensis_1	cox2	476	159	161	TCA (S) => TTA (L)	1
Syndiclis_anlungensis_1	cox2	544	182	184	CCT (P) => TCT (S)	1
Syndiclis_anlungensis_1	cox2	557	186	188	CCT (P) => CTT (L)	1
Syndiclis_anlungensis_1	cox2	581	194	196	TCA (S) => TTA (L)	1
Syndiclis_anlungensis_1	cox2	614	205	207	TCA (S) => TTA (L)	1
Syndiclis_anlungensis_1	cox2	632	211	213	TCG (S) => TTG (L)	0.84
Syndiclis_anlungensis_1	cox2	676	226	228	CGT (R) => TGT (C)	1
Syndiclis_anlungensis_1	cox2	695	232	234	TCT (S) => TTT (F)	1
Syndiclis_anlungensis_1	cox2	698	233	235	ACG (T) => ATG (M)	1
Syndiclis_anlungensis_1	cox2	742	248	250	CGG (R) => TGG (W)	1
Syndiclis_anlungensis_1	cox3	112	38	39	CCA (P) => TCA (S)	1
Syndiclis_anlungensis_1	cox3	245	82	83	CCT (P) => CTT (L)	0.92
Syndiclis_anlungensis_1	cox3	257	86	87	TCT (S) => TTT (F)	0.67
Syndiclis_anlungensis_1	cox3	263	88	89	CCG (P) => CTG (L)	1
Syndiclis_anlungensis_1	cox3	289	97	98	CTT (L) => TTT (F)	0.92
Syndiclis_anlungensis_1	cox3	298	100	101	CTT (L) => TTT (F)	1
Syndiclis_anlungensis_1	cox3	304	102	103	CGG (R) => TGG (W)	1
Syndiclis_anlungensis_1	cox3	311	104	105	TCT (S) => TTT (F)	0.92
Syndiclis_anlungensis_1	cox3	314	105	106	TCT (S) => TTT (F)	0.92
Syndiclis_anlungensis_1	cox3	388	130	131	CGG (R) => TGG (W)	1
Syndiclis_anlungensis_1	cox3	413	138	139	CCT (P) => CTT (L)	0.83
Syndiclis_anlungensis_1	cox3	419	140	141	CCC (P) => CTC (L)	1
Syndiclis_anlungensis_1	cox3	422	141	142	CCT (P) => CTT (L)	0.92
Syndiclis_anlungensis_1	cox3	512	171	172	TCA (S) => TTA (L)	0.75
Syndiclis_anlungensis_1	cox3	527	176	177	TCC (S) => TTC (F)	0.92
Syndiclis_anlungensis_1	cox3	566	189	190	TCC (S) => TTC (F)	0.92
Syndiclis_anlungensis_1	cox3	602	201	202	TCC (S) => TTC (F)	1
Syndiclis_anlungensis_1	cox3	605	202	203	TCA (S) => TTA (L)	1
Syndiclis_anlungensis_1	cox3	653	218	219	TCG (S) => TTG (L)	1
Syndiclis_anlungensis_1	cox3	754	252	253	CGG (R) => TGG (W)	0.92
Syndiclis_anlungensis_1	cox3	764	255	256	CCA (P) => CTA (L)	0.92
Syndiclis_anlungensis_1	mttB	31	11	156	CAT (H) => TAT (Y)	0.88
Syndiclis_anlungensis_1	mttB	56	19	164	TCG (S) => TTG (L)	0.88
Syndiclis_anlungensis_1	mttB	64	22	167	CCA (P) => TCA (S)	1
Syndiclis_anlungensis_1	mttB	100	34	179	CGT (R) => TGT (C)	0.88
Syndiclis_anlungensis_1	mttB	107	36	181	CCA (P) => CTA (L)	0.62
Syndiclis_anlungensis_1	mttB	113	38	183	CCA (P) => CTA (L)	0.5
Syndiclis_anlungensis_1	mttB	137	46	191	TCC (S) => TTC (F)	0.75
Syndiclis_anlungensis_1	mttB	169	57	202	CCG (P) => TCG (S)	1
Syndiclis_anlungensis_1	mttB	191	64	209	TCC (S) => TTC (F)	0.38
Syndiclis_anlungensis_1	mttB	226	76	221	CGT (R) => TGT (C)	0.62
Syndiclis_anlungensis_1	mttB	233	78	223	CCT (P) => CTT (L)	0.5
Syndiclis_anlungensis_1	mttB	242	81	226	TCG (S) => TTG (L)	0.5
Syndiclis_anlungensis_1	mttB	263	88	233	TCT (S) => TTT (F)	1
Syndiclis_anlungensis_1	mttB	272	91	236	TCG (S) => TTG (L)	0.75
Syndiclis_anlungensis_1	nad1	2	1	1	ACG (T) => ATG (M)	1
Syndiclis_anlungensis_1	nad1	167	56	59	TCG (S) => TTG (L)	1
Syndiclis_anlungensis_1	nad1	215	72	75	TCC (S) => TTC (F)	0.9
Syndiclis_anlungensis_1	nad1	265	89	92	CGG (R) => TGG (W)	1
Syndiclis_anlungensis_1	nad1	308	103	106	CCG (P) => CTG (L)	1
Syndiclis_anlungensis_1	nad1	368	123	126	ACA (T) => ATA (I)	0.7
Syndiclis_anlungensis_1	nad1	376	126	129	CGG (R) => TGG (W)	1
Syndiclis_anlungensis_1	nad1	401	134	137	TCT (S) => TTT (F)	1
Syndiclis_anlungensis_1	nad1	436	146	149	CCT (P) => TCT (S)	0.9
Syndiclis_anlungensis_1	nad1	490	164	167	CCC (P) => TCC (S)	1
Syndiclis_anlungensis_1	nad1	493	165	168	CGT (R) => TGT (C)	1
Syndiclis_anlungensis_1	nad1	500	167	170	TCG (S) => TTG (L)	0.7
Syndiclis_anlungensis_1	nad1	536	179	182	TCC (S) => TTC (F)	1
Syndiclis_anlungensis_1	nad1	571	191	194	CTC (L) => TTC (F)	1
Syndiclis_anlungensis_1	nad1	577	193	196	CCT (P) => TCT (S)	1
Syndiclis_anlungensis_1	nad1	580	194	197	CGT (R) => TGT (C)	1
Syndiclis_anlungensis_1	nad1	608	203	206	TCT (S) => TTT (F)	1
Syndiclis_anlungensis_1	nad1	635	212	215	TCA (S) => TTA (L)	1
Syndiclis_anlungensis_1	nad1	674	225	228	TCT (S) => TTT (F)	0.9
Syndiclis_anlungensis_1	nad1	683	228	231	TCT (S) => TTT (F)	1
Syndiclis_anlungensis_1	nad1	725	242	245	CCA (P) => CTA (L)	1
Syndiclis_anlungensis_1	nad1	734	245	248	TCG (S) => TTG (L)	0.9
Syndiclis_anlungensis_1	nad1	740	247	250	TCT (S) => TTT (F)	1
Syndiclis_anlungensis_1	nad1	743	248	251	CCA (P) => CTA (L)	1
Syndiclis_anlungensis_1	nad1	755	252	255	CCG (P) => CTG (L)	1
Syndiclis_anlungensis_1	nad1	779	260	263	TCC (S) => TTC (F)	0.9
Syndiclis_anlungensis_1	nad1	802	268	271	CGG (R) => TGG (W)	1
Syndiclis_anlungensis_1	nad1	830	277	280	CCG (P) => CTG (L)	1
Syndiclis_anlungensis_1	nad1	884	295	298	TCA (S) => TTA (L)	1
Syndiclis_anlungensis_1	nad1	893	298	301	CCT (P) => CTT (L)	1
Syndiclis_anlungensis_1	nad1	898	300	303	CGG (R) => TGG (W)	1
Syndiclis_anlungensis_1	nad1	928	310	313	CGG (R) => TGG (W)	1
Syndiclis_anlungensis_1	nad1	937	313	316	CCC (P) => TCC (S)	0.6
Syndiclis_anlungensis_1	nad1	953	318	321	TCA (S) => TTA (L)	1
Syndiclis_anlungensis_1	nad2	26	9	10	TCC (S) => TTC (F)	0.89
Syndiclis_anlungensis_1	nad2	214	72	73	CGG (R) => TGG (W)	0.67
Syndiclis_anlungensis_1	nad2	262	88	89	CTC (L) => TTC (F)	0.56
Syndiclis_anlungensis_1	nad2	266	89	90	CCA (P) => CTA (L)	1
Syndiclis_anlungensis_1	nad2	308	103	104	TCT (S) => TTT (F)	0.67
Syndiclis_anlungensis_1	nad2	311	104	105	TCC (S) => TTC (F)	1
Syndiclis_anlungensis_1	nad2	335	112	113	TCT (S) => TTT (F)	1
Syndiclis_anlungensis_1	nad2	341	114	115	TCC (S) => TTC (F)	0.67
Syndiclis_anlungensis_1	nad2	356	119	120	CCA (P) => CTA (L)	1
Syndiclis_anlungensis_1	nad2	361	121	122	CCT (P) => TCT (S)	1
Syndiclis_anlungensis_1	nad2	367	123	124	CGC (R) => TGC (C)	1
Syndiclis_anlungensis_1	nad2	388	130	131	CCG (P) => TCG (S)	1
Syndiclis_anlungensis_1	nad2	394	132	133	CAT (H) => TAT (Y)	1
Syndiclis_anlungensis_1	nad2	401	134	135	TCA (S) => TTA (L)	1
Syndiclis_anlungensis_1	nad2	428	143	144	CCT (P) => CTT (L)	1
Syndiclis_anlungensis_1	nad2	497	166	167	TCG (S) => TTG (L)	1
Syndiclis_anlungensis_1	nad2	523	175	176	CCC (P) => TCC (S)	1
Syndiclis_anlungensis_1	nad2	662	221	225	TCT (S) => TTT (F)	1
Syndiclis_anlungensis_1	nad2	677	226	230	TCC (S) => TTC (F)	1
Syndiclis_anlungensis_1	nad2	703	235	239	CTT (L) => TTT (F)	1
Syndiclis_anlungensis_1	nad2	712	238	242	CGG (R) => TGG (W)	1
Syndiclis_anlungensis_1	nad2	788	263	267	TCT (S) => TTT (F)	0.67
Syndiclis_anlungensis_1	nad2	800	267	271	TCA (S) => TTA (L)	1
Syndiclis_anlungensis_1	nad2	809	270	274	TCT (S) => TTT (F)	1
Syndiclis_anlungensis_1	nad2	920	307	311	CCT (P) => CTT (L)	1
Syndiclis_anlungensis_1	nad2	928	310	314	CAT (H) => TAT (Y)	1
Syndiclis_anlungensis_1	nad2	958	320	324	CGT (R) => TGT (C)	0.78
Syndiclis_anlungensis_1	nad2	962	321	325	ACT (T) => ATT (I)	1
Syndiclis_anlungensis_1	nad2	1028	343	347	TCA (S) => TTA (L)	0.78
Syndiclis_anlungensis_1	nad2	1058	353	357	CCA (P) => CTA (L)	1
Syndiclis_anlungensis_1	nad2	1127	376	380	TCG (S) => TTG (L)	1
Syndiclis_anlungensis_1	nad2	1189	397	401	CGT (R) => TGT (C)	1
Syndiclis_anlungensis_1	nad2	1247	416	420	CCA (P) => CTA (L)	0.67
Syndiclis_anlungensis_1	nad2	1276	426	430	CGT (R) => TGT (C)	1
Syndiclis_anlungensis_1	nad2	1298	433	437	GCG (A) => GTG (V)	1
Syndiclis_anlungensis_1	nad2	1400	467	471	TCA (S) => TTA (L)	0.67
Syndiclis_anlungensis_1	nad2	1403	468	472	TCC (S) => TTC (F)	1
Syndiclis_anlungensis_1	nad2	1409	470	474	CCA (P) => CTA (L)	1
Syndiclis_anlungensis_1	nad2	1457	486	490	TCA (S) => TTA (L)	1
Syndiclis_anlungensis_1	nad3	5	2	2	TCG (S) => TTG (L)	0.68
Syndiclis_anlungensis_1	nad3	44	15	15	CCG (P) => CTG (L)	1
Syndiclis_anlungensis_1	nad3	62	21	21	CCA (P) => CTA (L)	0.95
Syndiclis_anlungensis_1	nad3	80	27	27	CCA (P) => CTA (L)	1
Syndiclis_anlungensis_1	nad3	124	42	43	CAC (H) => TAC (Y)	1
Syndiclis_anlungensis_1	nad3	137	46	47	TCC (S) => TTC (F)	1
Syndiclis_anlungensis_1	nad3	146	49	50	TCC (S) => TTC (F)	1
Syndiclis_anlungensis_1	nad3	185	62	63	CCG (P) => CTG (L)	0.95
Syndiclis_anlungensis_1	nad3	190	64	65	CCT (P) => TCT (S)	1
Syndiclis_anlungensis_1	nad3	208	70	71	CCT (P) => TTT (F)	0.95
Syndiclis_anlungensis_1	nad3	209	70	71	CCT (P) => TTT (F)	0.95
Syndiclis_anlungensis_1	nad3	215	72	73	CCG (P) => CTG (L)	1
Syndiclis_anlungensis_1	nad3	230	77	78	TCC (S) => TTC (F)	0.86
Syndiclis_anlungensis_1	nad3	247	83	84	CCT (P) => TCT (S)	1
Syndiclis_anlungensis_1	nad3	251	84	85	CCC (P) => CTC (L)	0.91
Syndiclis_anlungensis_1	nad3	266	89	90	CCG (P) => CTG (L)	1
Syndiclis_anlungensis_1	nad3	275	92	93	TCT (S) => TTT (F)	1
Syndiclis_anlungensis_1	nad3	317	106	107	TCT (S) => TTT (F)	0.95
Syndiclis_anlungensis_1	nad3	344	115	116	TCG (S) => TTG (L)	1
Syndiclis_anlungensis_1	nad3	349	117	118	CGG (R) => TGG (W)	1
Syndiclis_anlungensis_1	nad4	29	10	10	TCC (S) => TTC (F)	0.67
Syndiclis_anlungensis_1	nad4	50	17	17	CCG (P) => CTG (L)	0.89
Syndiclis_anlungensis_1	nad4	74	25	25	ACT (T) => ATT (I)	0.89
Syndiclis_anlungensis_1	nad4	77	26	26	CCT (P) => CTT (L)	0.78
Syndiclis_anlungensis_1	nad4	107	36	36	CCG (P) => CTG (L)	1
Syndiclis_anlungensis_1	nad4	154	52	52	CCC (P) => TCC (S)	1
Syndiclis_anlungensis_1	nad4	158	53	53	CCT (P) => CTT (L)	1
Syndiclis_anlungensis_1	nad4	164	55	55	CCT (P) => CTT (L)	0.67
Syndiclis_anlungensis_1	nad4	166	56	56	CGG (R) => TGG (W)	1
Syndiclis_anlungensis_1	nad4	197	66	66	TCT (S) => TTT (F)	1
Syndiclis_anlungensis_1	nad4	317	106	106	TCA (S) => TTA (L)	1
Syndiclis_anlungensis_1	nad4	362	121	121	ACA (T) => ATA (I)	0.89
Syndiclis_anlungensis_1	nad4	368	123	123	TCT (S) => TTT (F)	1
Syndiclis_anlungensis_1	nad4	376	126	126	CGT (R) => TGT (C)	0.78
Syndiclis_anlungensis_1	nad4	401	134	134	TCC (S) => TTC (F)	1
Syndiclis_anlungensis_1	nad4	403	135	135	CGC (R) => TGC (C)	1
Syndiclis_anlungensis_1	nad4	416	139	139	CCT (P) => CTT (L)	0.89
Syndiclis_anlungensis_1	nad4	433	145	145	CTT (L) => TTT (F)	1
Syndiclis_anlungensis_1	nad4	436	146	146	CCC (P) => TTC (F)	0.89
Syndiclis_anlungensis_1	nad4	437	146	146	CCC (P) => TTC (F)	0.89
Syndiclis_anlungensis_1	nad4	449	150	150	CCA (P) => CTA (L)	1
Syndiclis_anlungensis_1	nad4	484	162	162	CCG (P) => TCG (S)	1
Syndiclis_anlungensis_1	nad4	533	178	178	TCA (S) => TTA (L)	1
Syndiclis_anlungensis_1	nad4	566	189	189	CCG (P) => CTG (L)	1
Syndiclis_anlungensis_1	nad4	577	193	193	CTC (L) => TTC (F)	0.67
Syndiclis_anlungensis_1	nad4	599	200	200	TCA (S) => TTA (L)	0.89
Syndiclis_anlungensis_1	nad4	608	203	203	TCA (S) => TTA (L)	1
Syndiclis_anlungensis_1	nad4	659	220	220	TCT (S) => TTT (F)	1
Syndiclis_anlungensis_1	nad4	710	237	237	TCA (S) => TTA (L)	1
Syndiclis_anlungensis_1	nad4	767	256	256	CCT (P) => CTT (L)	1
Syndiclis_anlungensis_1	nad4	770	257	257	TCA (S) => TTA (L)	1
Syndiclis_anlungensis_1	nad4	784	262	262	CAC (H) => TAC (Y)	1
Syndiclis_anlungensis_1	nad4	832	278	278	CGT (R) => TGT (C)	0.67
Syndiclis_anlungensis_1	nad4	836	279	279	TCC (S) => TTC (F)	1
Syndiclis_anlungensis_1	nad4	857	286	286	CCA (P) => CTA (L)	1
Syndiclis_anlungensis_1	nad4	883	295	295	CCC (P) => TCC (S)	1
Syndiclis_anlungensis_1	nad4	887	296	296	TCG (S) => TTG (L)	1
Syndiclis_anlungensis_1	nad4	896	299	299	TCA (S) => TTA (L)	0.89
Syndiclis_anlungensis_1	nad4	928	310	310	CAC (H) => TAC (Y)	1
Syndiclis_anlungensis_1	nad4	934	312	312	CCA (P) => TCA (S)	1
Syndiclis_anlungensis_1	nad4	971	324	324	TCT (S) => TTT (F)	1
Syndiclis_anlungensis_1	nad4	977	326	326	CCG (P) => CTG (L)	0.78
Syndiclis_anlungensis_1	nad4	1007	336	336	CCA (P) => CTA (L)	1
Syndiclis_anlungensis_1	nad4	1010	337	337	CCG (P) => CTG (L)	1
Syndiclis_anlungensis_1	nad4	1016	339	339	TCA (S) => TTA (L)	1
Syndiclis_anlungensis_1	nad4	1028	343	343	CCG (P) => CTG (L)	1
Syndiclis_anlungensis_1	nad4	1033	345	345	CCT (P) => TCT (S)	1
Syndiclis_anlungensis_1	nad4	1036	346	346	CCA (P) => TCA (S)	1
Syndiclis_anlungensis_1	nad4	1091	364	364	GCT (A) => GTT (V)	1
Syndiclis_anlungensis_1	nad4	1109	370	370	TCA (S) => TTA (L)	1
Syndiclis_anlungensis_1	nad4	1129	377	377	CTC (L) => TTC (F)	1
Syndiclis_anlungensis_1	nad4	1132	378	378	CCT (P) => TCT (S)	1
Syndiclis_anlungensis_1	nad4	1142	381	381	TCC (S) => TTC (F)	1
Syndiclis_anlungensis_1	nad4	1148	383	383	TCT (S) => TTT (F)	0.89
Syndiclis_anlungensis_1	nad4	1151	384	384	TCC (S) => TTC (F)	1
Syndiclis_anlungensis_1	nad4	1172	391	391	TCA (S) => TTA (L)	1
Syndiclis_anlungensis_1	nad4	1205	402	402	CCC (P) => CTC (L)	1
Syndiclis_anlungensis_1	nad4	1211	404	404	TCA (S) => TTA (L)	1
Syndiclis_anlungensis_1	nad4	1307	436	436	GCG (A) => GTG (V)	1
Syndiclis_anlungensis_1	nad4	1355	452	452	CCA (P) => CTA (L)	1
Syndiclis_anlungensis_1	nad4	1373	458	458	TCC (S) => TTC (F)	0.78
Syndiclis_anlungensis_1	nad4	1405	469	469	CGG (R) => TGG (W)	1
Syndiclis_anlungensis_1	nad4	1417	473	473	CAC (H) => TAC (Y)	1
Syndiclis_anlungensis_1	nad4	1433	478	478	CCG (P) => CTG (L)	1
Syndiclis_anlungensis_1	nad4	1438	480	480	CGC (R) => TGC (C)	1
Syndiclis_anlungensis_1	nad4L	2	1	1	ACG (T) => ATG (M)	1
Syndiclis_anlungensis_1	nad4L	8	3	3	CCT (P) => CTT (L)	0.88
Syndiclis_anlungensis_1	nad4L	41	14	14	TCT (S) => TTT (F)	1
Syndiclis_anlungensis_1	nad4L	47	16	16	TCA (S) => TTA (L)	1
Syndiclis_anlungensis_1	nad4L	55	19	19	CGG (R) => TGG (W)	1
Syndiclis_anlungensis_1	nad4L	86	29	29	CCT (P) => CTT (L)	1
Syndiclis_anlungensis_1	nad4L	95	32	32	TCA (S) => TTA (L)	1
Syndiclis_anlungensis_1	nad4L	100	34	34	CCA (P) => TCA (S)	1
Syndiclis_anlungensis_1	nad4L	110	37	37	TCA (S) => TTA (L)	1
Syndiclis_anlungensis_1	nad4L	131	44	44	TCG (S) => TTG (L)	0.88
Syndiclis_anlungensis_1	nad4L	179	60	60	TCA (S) => TTA (L)	0.75
Syndiclis_anlungensis_1	nad4L	188	63	63	TCA (S) => TTA (L)	0.88
Syndiclis_anlungensis_1	nad4L	197	66	66	CCA (P) => CTA (L)	0.88
Syndiclis_anlungensis_1	nad4L	230	77	77	CCA (P) => CTA (L)	1
Syndiclis_anlungensis_1	nad4L	281	94	94	TCT (S) => TTT (F)	0.88
Syndiclis_anlungensis_1	nad5	155	52	52	CCG (P) => CTG (L)	1
Syndiclis_anlungensis_1	nad5	242	81	81	CCG (P) => CTG (L)	1
Syndiclis_anlungensis_1	nad5	272	91	91	TCC (S) => TTC (F)	0.7
Syndiclis_anlungensis_1	nad5	358	120	120	CCT (P) => TTT (F)	1
Syndiclis_anlungensis_1	nad5	359	120	120	CCT (P) => TTT (F)	1
Syndiclis_anlungensis_1	nad5	374	125	125	CCA (P) => CTA (L)	0.9
Syndiclis_anlungensis_1	nad5	398	133	133	TCT (S) => TTT (F)	0.9
Syndiclis_anlungensis_1	nad5	494	165	165	ACA (T) => ATA (I)	1
Syndiclis_anlungensis_1	nad5	506	169	169	CCT (P) => CTT (L)	1
Syndiclis_anlungensis_1	nad5	533	178	178	TCA (S) => TTA (L)	1
Syndiclis_anlungensis_1	nad5	539	180	180	CCT (P) => CTT (L)	1
Syndiclis_anlungensis_1	nad5	548	183	183	TCG (S) => TTG (L)	0.4
Syndiclis_anlungensis_1	nad5	553	185	185	CGT (R) => TGT (C)	1
Syndiclis_anlungensis_1	nad5	581	194	194	TCT (S) => TTT (F)	1
Syndiclis_anlungensis_1	nad5	598	200	200	CGT (R) => TGT (C)	1
Syndiclis_anlungensis_1	nad5	629	210	213	TCT (S) => TTT (F)	0.9
Syndiclis_anlungensis_1	nad5	631	211	214	CGC (R) => TGC (C)	0.9
Syndiclis_anlungensis_1	nad5	676	226	229	CTT (L) => TTT (F)	0.9
Syndiclis_anlungensis_1	nad5	689	230	233	GCT (A) => GTT (V)	1
Syndiclis_anlungensis_1	nad5	713	238	241	TCG (S) => TTG (L)	1
Syndiclis_anlungensis_1	nad5	721	241	244	CGG (R) => TGG (W)	1
Syndiclis_anlungensis_1	nad5	725	242	245	TCA (S) => TTA (L)	1
Syndiclis_anlungensis_1	nad5	764	255	258	TCG (S) => TTG (L)	1
Syndiclis_anlungensis_1	nad5	782	261	264	ACG (T) => ATG (M)	1
Syndiclis_anlungensis_1	nad5	835	279	282	CCA (P) => TCA (S)	0.9
Syndiclis_anlungensis_1	nad5	863	288	291	TCT (S) => TTT (F)	0.8
Syndiclis_anlungensis_1	nad5	875	292	295	ACG (T) => ATG (M)	1
Syndiclis_anlungensis_1	nad5	920	307	310	CCA (P) => CTA (L)	1
Syndiclis_anlungensis_1	nad5	1175	392	395	TCT (S) => TTT (F)	1
Syndiclis_anlungensis_1	nad5	1184	395	398	CCA (P) => CTA (L)	1
Syndiclis_anlungensis_1	nad5	1193	398	401	TCT (S) => TTT (F)	1
Syndiclis_anlungensis_1	nad5	1310	437	440	TCA (S) => TTA (L)	1
Syndiclis_anlungensis_1	nad5	1400	467	470	TCA (S) => TTA (L)	1
Syndiclis_anlungensis_1	nad5	1490	497	500	CCC (P) => CTC (L)	0.8
Syndiclis_anlungensis_1	nad5	1550	517	520	ACA (T) => ATA (I)	0.9
Syndiclis_anlungensis_1	nad5	1568	523	526	CCG (P) => CTG (L)	0.9
Syndiclis_anlungensis_1	nad5	1580	527	530	TCA (S) => TTA (L)	0.8
Syndiclis_anlungensis_1	nad5	1589	530	533	TCT (S) => TTT (F)	0.9
Syndiclis_anlungensis_1	nad5	1610	537	540	CCC (P) => CTC (L)	0.7
Syndiclis_anlungensis_1	nad5	1859	620	623	TCT (S) => TTT (F)	0.8
Syndiclis_anlungensis_1	nad5	1895	632	635	TCA (S) => TTA (L)	1
Syndiclis_anlungensis_1	nad5	1901	634	637	CCA (P) => CTA (L)	0.7
Syndiclis_anlungensis_1	nad5	1916	639	642	TCT (S) => TTT (F)	0.7
Syndiclis_anlungensis_1	nad5	1918	640	643	CGT (R) => TGT (C)	0.7
Syndiclis_anlungensis_1	nad5	1958	653	656	TCG (S) => TTG (L)	0.9
Syndiclis_anlungensis_1	nad6	17	6	8	TCG (S) => TTG (L)	0.7
Syndiclis_anlungensis_1	nad6	26	9	11	CCT (P) => CTT (L)	0.4
Syndiclis_anlungensis_1	nad6	76	26	28	CCC (P) => TCC (S)	1
Syndiclis_anlungensis_1	nad6	83	28	30	TCG (S) => TTG (L)	1
Syndiclis_anlungensis_1	nad6	88	30	32	CCC (P) => TTC (F)	0.7
Syndiclis_anlungensis_1	nad6	89	30	32	CCC (P) => TTC (F)	0.7
Syndiclis_anlungensis_1	nad6	95	32	34	CCA (P) => CTA (L)	1
Syndiclis_anlungensis_1	nad6	103	35	37	CGC (R) => TGC (C)	1
Syndiclis_anlungensis_1	nad6	146	49	51	TCC (S) => TTC (F)	1
Syndiclis_anlungensis_1	nad6	158	53	55	TCC (S) => TTC (F)	1
Syndiclis_anlungensis_1	nad6	161	54	56	CCA (P) => CTA (L)	1
Syndiclis_anlungensis_1	nad6	169	57	59	CAT (H) => TAT (Y)	1
Syndiclis_anlungensis_1	nad6	191	64	66	TCA (S) => TTA (L)	1
Syndiclis_anlungensis_1	nad6	236	79	81	ACT (T) => ATT (I)	1
Syndiclis_anlungensis_1	nad6	379	127	129	CAT (H) => TAT (Y)	0.9
Syndiclis_anlungensis_1	nad6	446	149	151	TCC (S) => TTC (F)	1
Syndiclis_anlungensis_1	nad6	451	151	153	CGG (R) => TGG (W)	0.7
Syndiclis_anlungensis_1	nad6	463	155	157	CCT (P) => TCT (S)	0.8
Syndiclis_anlungensis_1	nad6	470	157	159	CCT (P) => CTT (L)	1
Syndiclis_anlungensis_1	nad6	569	190	192	TCT (S) => TTT (F)	1
Syndiclis_anlungensis_1	nad6	605	202	204	TCA (S) => TTA (L)	0.4
Syndiclis_anlungensis_1	nad7	38	13	13	TCG (S) => TTG (L)	0.75
Syndiclis_anlungensis_1	nad7	44	15	15	TCC (S) => TTC (F)	1
Syndiclis_anlungensis_1	nad7	77	26	26	TCA (S) => TTA (L)	1
Syndiclis_anlungensis_1	nad7	83	28	28	TCA (S) => TTA (L)	1
Syndiclis_anlungensis_1	nad7	137	46	46	TCA (S) => TTA (L)	1
Syndiclis_anlungensis_1	nad7	200	67	67	TCT (S) => TTT (F)	1
Syndiclis_anlungensis_1	nad7	209	70	70	TCA (S) => TTA (L)	0.88
Syndiclis_anlungensis_1	nad7	224	75	75	ACG (T) => ATG (M)	1
Syndiclis_anlungensis_1	nad7	244	82	82	CAT (H) => TAT (Y)	1
Syndiclis_anlungensis_1	nad7	251	84	84	TCA (S) => TTA (L)	1
Syndiclis_anlungensis_1	nad7	316	106	106	CGT (R) => TGT (C)	1
Syndiclis_anlungensis_1	nad7	335	112	112	TCA (S) => TTA (L)	0.88
Syndiclis_anlungensis_1	nad7	344	115	115	TCA (S) => TTA (L)	1
Syndiclis_anlungensis_1	nad7	353	118	118	TCA (S) => TTA (L)	1
Syndiclis_anlungensis_1	nad7	383	128	128	TCA (S) => TTA (L)	1
Syndiclis_anlungensis_1	nad7	404	135	135	TCT (S) => TTT (F)	1
Syndiclis_anlungensis_1	nad7	433	145	145	CAT (H) => TAT (Y)	1
Syndiclis_anlungensis_1	nad7	445	149	149	CCG (P) => TCG (S)	0.88
Syndiclis_anlungensis_1	nad7	512	171	171	TCA (S) => TTA (L)	1
Syndiclis_anlungensis_1	nad7	533	178	178	TCC (S) => TTC (F)	1
Syndiclis_anlungensis_1	nad7	566	189	189	TCA (S) => TTA (L)	0.88
Syndiclis_anlungensis_1	nad7	578	193	193	TCA (S) => TTA (L)	0.88
Syndiclis_anlungensis_1	nad7	679	227	227	CCT (P) => TCT (S)	0.88
Syndiclis_anlungensis_1	nad7	698	233	233	TCG (S) => TTG (L)	1
Syndiclis_anlungensis_1	nad7	724	242	242	CAT (H) => TAT (Y)	1
Syndiclis_anlungensis_1	nad7	734	245	245	TCG (S) => TTG (L)	0.88
Syndiclis_anlungensis_1	nad7	739	247	247	CCT (P) => TTT (F)	1
Syndiclis_anlungensis_1	nad7	740	247	247	CCT (P) => TTT (F)	1
Syndiclis_anlungensis_1	nad7	769	257	257	CGC (R) => TGC (C)	1
Syndiclis_anlungensis_1	nad7	836	279	280	CCT (P) => CTT (L)	1
Syndiclis_anlungensis_1	nad7	926	309	310	TCA (S) => TTA (L)	0.88
Syndiclis_anlungensis_1	nad7	944	315	316	CCT (P) => CTT (L)	1
Syndiclis_anlungensis_1	nad7	973	325	326	CCT (P) => TCT (S)	0.88
Syndiclis_anlungensis_1	nad7	1057	353	354	CGT (R) => TGT (C)	1
Syndiclis_anlungensis_1	nad7	1079	360	361	TCT (S) => TTT (F)	1
Syndiclis_anlungensis_1	nad7	1088	363	364	TCA (S) => TTA (L)	1
Syndiclis_anlungensis_1	nad7	1103	368	369	TCT (S) => TTT (F)	1
Syndiclis_anlungensis_1	nad7	1124	375	376	CCA (P) => CTA (L)	1
Syndiclis_anlungensis_1	nad7	1166	389	390	TCT (S) => TTT (F)	1
Syndiclis_anlungensis_1	nad9	14	5	5	TCC (S) => TTC (F)	0.67
Syndiclis_anlungensis_1	nad9	92	31	31	TCT (S) => TTT (F)	0.75
Syndiclis_anlungensis_1	nad9	113	38	38	CCA (P) => CTA (L)	0.92
Syndiclis_anlungensis_1	nad9	167	56	56	TCG (S) => TTG (L)	0.92
Syndiclis_anlungensis_1	nad9	190	64	64	CAT (H) => TAT (Y)	1
Syndiclis_anlungensis_1	nad9	223	75	75	CAT (H) => TAT (Y)	1
Syndiclis_anlungensis_1	nad9	298	100	100	CCG (P) => TCG (S)	0.83
Syndiclis_anlungensis_1	nad9	311	104	104	CCA (P) => CTA (L)	0.75
Syndiclis_anlungensis_1	nad9	356	119	119	TCT (S) => TTT (F)	1
Syndiclis_anlungensis_1	nad9	368	123	123	TCC (S) => TTC (F)	1
Syndiclis_anlungensis_1	nad9	398	133	133	TCA (S) => TTA (L)	1
Syndiclis_anlungensis_1	nad9	406	136	136	CAT (H) => TAT (Y)	1
Syndiclis_anlungensis_1	nad9	439	147	147	CTT (L) => TTT (F)	1
Syndiclis_anlungensis_1	nad9	539	180	180	TCT (S) => TTT (F)	1
Syndiclis_anlungensis_1	rpl10	77	26	26	CCT (P) => CTT (L)	1
Syndiclis_anlungensis_1	rpl10	101	34	34	TCG (S) => TTG (L)	0.83
Syndiclis_anlungensis_1	rpl10	134	45	45	CCA (P) => CTA (L)	0.83
Syndiclis_anlungensis_1	rpl10	155	52	52	CCA (P) => CTA (L)	0.83
Syndiclis_anlungensis_1	rpl10	236	79	80	TCG (S) => TTG (L)	0.83
Syndiclis_anlungensis_1	rpl10	266	89	90	TCG (S) => TTG (L)	1
Syndiclis_anlungensis_1	rpl10	311	104	105	TCA (S) => TTA (L)	0.83
Syndiclis_anlungensis_1	rpl10	406	136	137	CAT (H) => TAT (Y)	0.83
Syndiclis_anlungensis_1	rpl16	37	13	27	CAG (Q) => TAG (X)	0.56
Syndiclis_anlungensis_1	rpl16	142	48	62	CGC (R) => TGC (C)	0.78
Syndiclis_anlungensis_1	rpl16	185	62	76	ACC (T) => ATC (I)	1
Syndiclis_anlungensis_1	rpl16	245	82	96	ACA (T) => ATA (I)	0.89
Syndiclis_anlungensis_1	rpl16	313	105	122	CTC (L) => TTC (F)	0.89
Syndiclis_anlungensis_1	rpl16	416	139	156	CCA (P) => CTA (L)	1
Syndiclis_anlungensis_1	rpl16	482	161	178	CCA (P) => CTA (L)	0.89
Syndiclis_anlungensis_1	rpl16	488	163	180	TCG (S) => TTG (L)	0.67
Syndiclis_anlungensis_1	rpl2	215	72	72	CCA (P) => CTA (L)	0.75
Syndiclis_anlungensis_1	rpl2	247	83	83	CGC (R) => TGC (C)	0.5
Syndiclis_anlungensis_1	rpl2	304	102	102	CCT (P) => TCT (S)	0.5
Syndiclis_anlungensis_1	rpl2	344	115	115	TCC (S) => TTC (F)	0.5
Syndiclis_anlungensis_1	rpl2	485	162	167	GCG (A) => GTG (V)	0.5
Syndiclis_anlungensis_1	rpl2	508	170	175	CTC (L) => TTC (F)	0.75
Syndiclis_anlungensis_1	rpl2	1090	364	384	CCT (P) => TCT (S)	0.5
Syndiclis_anlungensis_1	rpl5	35	12	21	TCA (S) => TTA (L)	0.78
Syndiclis_anlungensis_1	rpl5	47	16	25	CCG (P) => CTG (L)	1
Syndiclis_anlungensis_1	rpl5	59	20	29	CCG (P) => CTG (L)	0.89
Syndiclis_anlungensis_1	rpl5	64	22	31	CAC (H) => TAC (Y)	1
Syndiclis_anlungensis_1	rpl5	92	31	40	TCG (S) => TTG (L)	1
Syndiclis_anlungensis_1	rpl5	167	56	67	CCG (P) => CTG (L)	0.44
Syndiclis_anlungensis_1	rpl5	169	57	68	CGC (R) => TGC (C)	0.89
Syndiclis_anlungensis_1	rpl5	317	106	125	TCG (S) => TTG (L)	0.89
Syndiclis_anlungensis_1	rpl5	329	110	129	TCG (S) => TTG (L)	0.44
Syndiclis_anlungensis_1	rpl5	376	126	147	CCC (P) => TCC (S)	1
Syndiclis_anlungensis_1	rpl5	512	171	192	CCA (P) => CTA (L)	0.89
Syndiclis_anlungensis_1	rpl5	515	172	193	CCG (P) => CTG (L)	1
Syndiclis_anlungensis_1	rps10	2	1	1	ACG (T) => ATG (M)	1
Syndiclis_anlungensis_1	rps10	16	6	6	CGC (R) => TGC (C)	0.4
Syndiclis_anlungensis_1	rps10	238	80	80	CGG (R) => TGG (W)	0.6
Syndiclis_anlungensis_1	rps10	266	89	89	GCT (A) => GTT (V)	0.4
Syndiclis_anlungensis_1	rps10	302	101	101	TCG (S) => TTG (L)	1
Syndiclis_anlungensis_1	rps10	331	111	111	CGA (R) => TGA (X)	0.6
Syndiclis_anlungensis_1	rps11	139	47	47	CAT (H) => TAT (Y)	1
Syndiclis_anlungensis_1	rps11	148	50	50	CCG (P) => TCG (S)	1
Syndiclis_anlungensis_1	rps11	514	172	172	CAA (Q) => TAA (X)	1
Syndiclis_anlungensis_1	rps12	71	24	24	TCG (S) => TTG (L)	0.94
Syndiclis_anlungensis_1	rps12	100	34	34	CGC (R) => TGC (C)	1
Syndiclis_anlungensis_1	rps12	104	35	35	CCG (P) => CTG (L)	1
Syndiclis_anlungensis_1	rps12	112	38	38	CCG (P) => TCG (S)	0.88
Syndiclis_anlungensis_1	rps12	146	49	49	CCA (P) => CTA (L)	1
Syndiclis_anlungensis_1	rps12	196	66	66	CAC (H) => TAC (Y)	0.94
Syndiclis_anlungensis_1	rps12	221	74	74	TCG (S) => TTG (L)	0.88
Syndiclis_anlungensis_1	rps12	232	78	78	CCT (P) => TCT (S)	1
Syndiclis_anlungensis_1	rps12	269	90	90	TCG (S) => TTG (L)	0.94
Syndiclis_anlungensis_1	rps12	284	95	95	TCC (S) => TTC (F)	0.76
Syndiclis_anlungensis_1	rps12	289	97	97	CGT (R) => TGT (C)	0.88
Syndiclis_anlungensis_1	rps13	5	2	6	TCA (S) => TTA (L)	0.6
Syndiclis_anlungensis_1	rps13	26	9	13	TCA (S) => TTA (L)	0.9
Syndiclis_anlungensis_1	rps13	56	19	23	TCA (S) => TTA (L)	0.9
Syndiclis_anlungensis_1	rps13	100	34	38	CGT (R) => TGT (C)	0.9
Syndiclis_anlungensis_1	rps13	256	86	90	CGT (R) => TGT (C)	1
Syndiclis_anlungensis_1	rps13	287	96	100	TCG (S) => TTG (L)	1
Syndiclis_anlungensis_1	rps14	47	16	16	GCG (A) => GTG (V)	0.6
Syndiclis_anlungensis_1	rps14	127	43	43	CAT (H) => TAT (Y)	0.4
Syndiclis_anlungensis_1	rps14	194	65	65	TCC (S) => TTC (F)	0.6
Syndiclis_anlungensis_1	rps14	271	91	91	CCT (P) => TCT (S)	0.6
Syndiclis_anlungensis_1	rps19	116	39	60	TCG (S) => TTG (L)	1
Syndiclis_anlungensis_1	rps19	137	46	67	TCC (S) => TTC (F)	0.33
Syndiclis_anlungensis_1	rps19	163	55	76	CCT (P) => TTT (F)	1
Syndiclis_anlungensis_1	rps19	164	55	76	CCT (P) => TTT (F)	1
Syndiclis_anlungensis_1	rps1	125	42	59	CCT (P) => CTT (L)	0.67
Syndiclis_anlungensis_1	rps1	158	53	70	CCT (P) => CTT (L)	0.67
Syndiclis_anlungensis_1	rps1	482	161	178	TCA (S) => TTA (L)	0.67
Syndiclis_anlungensis_1	rps3	58	20	20	CCA (P) => TCA (S)	1
Syndiclis_anlungensis_1	rps3	64	22	22	CGG (R) => TGG (W)	1
Syndiclis_anlungensis_1	rps3	92	31	31	TCA (S) => TTA (L)	0.71
Syndiclis_anlungensis_1	rps3	512	171	176	TCA (S) => TTA (L)	0.71
Syndiclis_anlungensis_1	rps3	713	238	251	TCG (S) => TTG (L)	0.86
Syndiclis_anlungensis_1	rps3	1031	344	364	CCA (P) => CTA (L)	0.86
Syndiclis_anlungensis_1	rps3	1364	455	480	CCG (P) => CTG (L)	1
Syndiclis_anlungensis_1	rps3	1391	464	489	CCG (P) => CTG (L)	0.86
Syndiclis_anlungensis_1	rps3	1502	501	526	TCA (S) => TTA (L)	1
Syndiclis_anlungensis_1	rps3	1555	519	545	CGT (R) => TGT (C)	1
Syndiclis_anlungensis_1	rps3	1588	530	556	CCT (P) => TCT (S)	0.57
Syndiclis_anlungensis_1	rps3	1619	540	566	TCA (S) => TTA (L)	0.86
Syndiclis_anlungensis_1	rps3	1633	545	571	CGG (R) => TGG (W)	1
Syndiclis_anlungensis_1	rps4	41	14	100	CCA (P) => CTA (L)	1
Syndiclis_anlungensis_1	rps4	50	17	103	CCA (P) => CTA (L)	0.83
Syndiclis_anlungensis_1	rps4	62	21	107	TCG (S) => TTG (L)	0.67
Syndiclis_anlungensis_1	rps4	74	25	111	CCG (P) => CTG (L)	0.83
Syndiclis_anlungensis_1	rps4	91	31	117	CGT (R) => TGT (C)	0.5
Syndiclis_anlungensis_1	rps4	119	40	126	CCG (P) => CTG (L)	1
Syndiclis_anlungensis_1	rps4	266	89	175	TCA (S) => TTA (L)	1
Syndiclis_anlungensis_1	rps4	692	231	349	TCG (S) => TTG (L)	0.83
Syndiclis_anlungensis_1	rps4	703	235	353	CAT (H) => TAT (Y)	0.83
Syndiclis_anlungensis_1	rps4	713	238	356	CCA (P) => CTA (L)	0.67
Syndiclis_anlungensis_1	rps4	728	243	361	TCT (S) => TTT (F)	1
Syndiclis_anlungensis_1	rps4	779	260	378	CCA (P) => CTA (L)	0.83
Syndiclis_anlungensis_1	rps4	788	263	381	CCT (P) => CTT (L)	0.83
Syndiclis_anlungensis_1	rps4	793	265	383	CGG (R) => TGG (W)	0.83
Syndiclis_anlungensis_1	rps7	116	39	39	CCA (P) => CTA (L)	0.75
Syndiclis_anlungensis_1	rps7	335	112	131	TCA (S) => TTA (L)	0.88
Syndiclis_anlungensis_1	rps7	338	113	132	TCT (S) => TTT (F)	0.62
Syndiclis_anlungensis_1	sdh3	28	10	10	CCA (P) => TCA (S)	0.57
Syndiclis_anlungensis_1	sdh3	73	25	25	CCA (P) => TCA (S)	1
Syndiclis_anlungensis_1	sdh3	140	47	47	CCG (P) => CTG (L)	0.57
Syndiclis_anlungensis_1	sdh3	185	62	62	TCC (S) => TTC (F)	0.71
Syndiclis_anlungensis_1	sdh3	190	64	64	CCT (P) => TTT (F)	1
Syndiclis_anlungensis_1	sdh3	191	64	64	CCT (P) => TTT (F)	1
Syndiclis_anlungensis_1	sdh3	212	71	75	CCA (P) => CTA (L)	0.71
Syndiclis_anlungensis_1	sdh3	218	73	77	TCA (S) => TTA (L)	0.43
Syndiclis_anlungensis_1	sdh4	155	52	52	CCA (P) => CTA (L)	0.88
Syndiclis_anlungensis_1	sdh4	158	53	53	CCC (P) => CTC (L)	0.62
Syndiclis_anlungensis_1	sdh4	194	65	66	TCC (S) => TTC (F)	0.62
Syndiclis_anlungensis_1	sdh4	200	67	68	CCT (P) => CTT (L)	0.75
Syndiclis_anlungensis_1	sdh4	256	86	87	CAT (H) => TAT (Y)	0.88
Syndiclis_anlungensis_1	sdh4	352	118	119	CTT (L) => TTT (F)	0.62
Syndiclis_anlungensis_2	cox1	2	1	1	ACG (T) => ATG (M)	1
Syndiclis_anlungensis_2	cox1	11	4	4	CCG (P) => CTG (L)	0.67
Syndiclis_anlungensis_2	cox1	196	66	67	CCT (P) => TTT (F)	1
Syndiclis_anlungensis_2	cox1	197	66	67	CCT (P) => TTT (F)	1
Syndiclis_anlungensis_2	cox1	242	81	82	TCT (S) => TTT (F)	1
Syndiclis_anlungensis_2	cox1	254	85	86	TCT (S) => TTT (F)	1
Syndiclis_anlungensis_2	cox1	299	100	101	TCA (S) => TTA (L)	1
Syndiclis_anlungensis_2	cox1	352	118	119	CCA (P) => TCA (S)	1
Syndiclis_anlungensis_2	cox1	443	148	149	TCA (S) => TTA (L)	1
Syndiclis_anlungensis_2	cox1	452	151	152	TCT (S) => TTT (F)	1
Syndiclis_anlungensis_2	cox1	458	153	154	CCT (P) => CTT (L)	1
Syndiclis_anlungensis_2	cox1	515	172	173	TCC (S) => TTC (F)	1
Syndiclis_anlungensis_2	cox1	551	184	185	TCA (S) => TTA (L)	1
Syndiclis_anlungensis_2	cox1	575	192	193	CCA (P) => CTA (L)	1
Syndiclis_anlungensis_2	cox1	590	197	198	CCA (P) => CTA (L)	1
Syndiclis_anlungensis_2	cox1	668	223	224	TCT (S) => TTT (F)	1
Syndiclis_anlungensis_2	cox1	715	239	240	CGG (R) => TGG (W)	1
Syndiclis_anlungensis_2	cox1	746	249	250	CCC (P) => CTC (L)	1
Syndiclis_anlungensis_2	cox1	752	251	252	CCG (P) => CTG (L)	1
Syndiclis_anlungensis_2	cox1	761	254	255	TCC (S) => TTC (F)	1
Syndiclis_anlungensis_2	cox1	854	285	286	CCT (P) => CTT (L)	1
Syndiclis_anlungensis_2	cox1	860	287	288	TCT (S) => TTT (F)	1
Syndiclis_anlungensis_2	cox1	868	290	291	CGG (R) => TGG (W)	1
Syndiclis_anlungensis_2	cox1	1037	346	347	TCC (S) => TTC (F)	1
Syndiclis_anlungensis_2	cox1	1079	360	361	CCG (P) => CTG (L)	1
Syndiclis_anlungensis_2	cox1	1124	375	376	GCG (A) => GTG (V)	1
Syndiclis_anlungensis_2	cox1	1165	389	390	CTT (L) => TTT (F)	1
Syndiclis_anlungensis_2	cox1	1186	396	397	CAC (H) => TAC (Y)	1
Syndiclis_anlungensis_2	cox1	1259	420	421	TCT (S) => TTT (F)	1
Syndiclis_anlungensis_2	cox1	1274	425	426	CCG (P) => CTG (L)	0.89
Syndiclis_anlungensis_2	cox1	1279	427	428	CTC (L) => TTC (F)	1
Syndiclis_anlungensis_2	cox1	1373	458	459	TCT (S) => TTT (F)	0.89
Syndiclis_anlungensis_2	cox1	1378	460	461	CCT (P) => TCT (S)	1
Syndiclis_anlungensis_2	cox1	1402	468	469	CGT (R) => TGT (C)	0.67
Syndiclis_anlungensis_2	cox1	1405	469	470	CGT (R) => TGT (C)	0.78
Syndiclis_anlungensis_2	cox1	1433	478	479	TCA (S) => TTA (L)	1
Syndiclis_anlungensis_2	cox1	1489	497	498	CCA (P) => TCA (S)	1
Syndiclis_anlungensis_2	cox1	1499	500	501	CCG (P) => CTG (L)	1
Syndiclis_anlungensis_2	rps2	179	60	65	CCC (P) => CTC (L)	0.43
Syndiclis_anlungensis_2	rps2	200	67	72	TCC (S) => TTC (F)	0.57
Syndiclis_anlungensis_2	rps2	251	84	92	GCG (A) => GTG (V)	0.43
Syndiclis_anlungensis_2	rps2	362	121	171	TCG (S) => TTG (L)	0.57
Syndiclis_anlungensis_2	rps2	452	151	201	GCA (A) => GTA (V)	0.71
Syndiclis_anlungensis_2	rps2	458	153	203	TCA (S) => TTA (L)	1
Syndiclis_anlungensis_2	rps2	523	175	226	CCT (P) => TCT (S)	1
Syndiclis_anlungensis_2	rps2	547	183	235	CGT (R) => TGT (C)	1
Syndiclis_anlungensis_2	rps2	554	185	237	TCG (S) => TTG (L)	1
